# Supplementary material for: Prevalence of mutations associated with artemisinin partial resistance and sulfadoxine–pyrimethamine resistance in 13 regions in Tanzania in 2021: a cross-sectional survey
Source: PubMed Central journal article supplement (PMC11464622; doi:10.1016/s2666-5247(24)00160-5), 2024-10
Supplement: mmc1.pdf [file mmc1.pdf]

# THE LANCET Microbe

## Supplementary appendix

This appendix formed part of the original submission and has been peer reviewed.  
We post it as supplied by the authors.

Supplement to: Juliano JJ, Giesbrecht DJ, Simkin A, et al. Prevalence of mutations associated with artemisinin partial resistance and sulfadoxine–pyrimethamine resistance in 13 regions in Tanzania in 2021: a cross-sectional survey. *Lancet Microbe* 2024. [https://doi.org/10.1016/S2666-5247\(24\)00160-5](https://doi.org/10.1016/S2666-5247(24)00160-5)

## SUPPLEMENTAL APPENDIX

### Prevalence of mutations associated with artemisinin partial resistance and sulfadoxine-pyrimethamine resistance in 13 regions in Tanzania in 2021: a cross-sectional survey

#### Table of Contents

|                        |    |
|------------------------|----|
| Supplemental Text..... | 2  |
| Table S1.....          | 4  |
| Table S2.....          | 5  |
| Table S3.....          | 7  |
| Table S4.....          | 9  |
| Figure S1.....         | 33 |
| Figure S2.....         | 34 |
| Figure S3.....         | 35 |
| Figure S4.....         | 36 |
| Figure S5.....         | 37 |
| References.....        | 38 |

## SUPPLEMENTAL TEXT

### **Study Design**

Cross-sectional sampling from 100 health facilities was undertaken according to the WHO protocol for surveillance of *Plasmodium falciparum* histidine rich proteins 2 and 3 (*pfhrp* 2/3) deletions.<sup>1,2</sup> Ten health facilities in each of the following regions were used: Dar es salaam, Dodoma, Kagera, Kilimanjaro, Manyara, Mara, Mtwara, Njombe, Songwe and Tabora. Patients that presented with symptoms compatible with uncomplicated malaria were approached and enrolled in the study. Written informed consent was provided by adult patients or parents/guardians for their children. Children aged 7 - 17 years also provided an assent. Enrollment criteria included being 6 months of age or older, meeting the case definition for uncomplicated malaria and residing in the study area. All clinic attendees who were enrolled in the study were provided with two types of malaria rapid diagnostic tests (mRDT), the standard histidine rich protein 2 (HRP2)/pan lactate dehydrogenase (LDH) mRDT used by the national health system and a *P. falciparum* LDH test [#C14RHG25, RapiGEN Inc. BIOCREDIT Malaria Ag Pf (Pf-pLDH), Republic of Korea], according to the WHO protocol and as described by Rogier et al.<sup>2</sup> Any patient with positive results by either of the two mRDTs was treated per national guidelines. In addition to mRDTs, all participants provided dried blood spots (DBS). These DBS were used to test for malaria using qPCR and sequencing. Participants who were mRDT were sequenced. In addition, a subset of qPCR positive mRDT negative were included in the study for sequencing.

In addition to health facility sampling, three cross-sectional community surveys were conducted in regions of Tanzania.<sup>3</sup> Malaria epidemiology in these regions has also been previously studied by the National Institute for Medical Research (NIMR).<sup>4,5</sup> Community samples were collected from 3 regions: Kigoma, Ruvuma, and Tanga. In these regions, asymptomatic community members or their guardians provided written consent (assent procedures were done as described above), were tested by an mRDT, and then provided DBS if positive for molecular analysis, including MIP sequencing.<sup>3</sup>

Participant characteristics are shown in **Table S2 p.5**. Age strata were designated based on previous reports.<sup>1</sup>

### **Molecular Inversion Probes**

Molecular surveillance of mutations that impact antimalarial resistance (**Table S1 p. 4**) should rely on platforms that can broadly detect different resistance mutations. Highly multiplex amplicon deep sequencing is one approach that has shown promise. Another approach is molecular inversion probes (MIPs), which have now been used extensively to characterize drug resistance and population structure in parasites in Africa.<sup>5-7</sup> The ability to create and combine different highly multiplexed panels for antimalarial resistance mutations, copy number variation, gene deletions and other genome wide polymorphisms to study complexity of infection, parasite relatedness or population structure makes the MIP platform a highly flexible and cost-effective means of conducting malaria molecular surveillance (MMS). The methods used to produce the parasite genotyping reported in this study are summarized as follows (**Figure S2, p.34**): 1.) Chelex purified DNA template was hybridized to long oligos approximately 100 base pairs long, with each oligo containing complementary arms to the targeted capture region, as well as universal primer sequences and a unique molecular identifier (UMI). 2.) Following hybridization, a circularization step was performed using T4 ligase, then non circularized DNA was digested using exonucleases I and III. 3.) The pool of circularized capture sequence was then PCR amplified using universal primers containing illumina adapters to produce an amplicon that can be sequenced on the Illumina NextSeq500 platform (Illumina, San Diego, CA).

Amplicons from each sample contained a dual index that was demultiplexed using Illumina's built-in `bcl2fastq2` software (Illumina, San Diego, CA). Resulting fastq data was further processed in `MIPtools` and variants were called using `freebayes` (<https://github.com/freebayes/freebayes>). Downstream filtering exploited the UMI clustering to enable high-confidence calls. Samples with less than 10X coverage at K13 R561H, were rebalanced by re-pooling amplified products to increase the ratio of samples with low coverage and resequenced.

For the MSMT programme, we recognized that the high priority regions neighboring Rwanda needed additional sequencing effort. After an initial pass with all of the MIP probes included in each capture reaction, we found that sample missingness was relatively high. This led to a second round of MIP capture with a greatly reduced probe set designed to capture only key gene fragments associated with well described drug resistance phenotypes (**Table S1, p.4**).

### **Specific Whole Genome Amplification**

Specific whole genome amplification (sWGA) is a technique that uses primers that more commonly or specifically bind to the pathogen of interest than to DNA in the background (e.g. human DNA). This method has been extensively used in malaria genomics to enrich parasite DNA from clinical samples to allow for whole genome sequencing. The sWGA reaction was carried out as previously described.<sup>8</sup> However, each sample was amplified in triplicate and the sWGA reactions pooled together prior to library preparation for whole genome sequencing.

### **Genomic architecture of artemisinin resistance polymorphisms from Southeast Asia**

To investigate associations with mutations previously found to occur in drug resistant parasites in Southeast Asia in combination with K13 mutations, we used the MIP panel genotypes and quantified mutations occurring in the same isolates.<sup>9</sup> None of the following mutations were seen in K13 561H isolates:

- *Plasmodium falciparum* chloroquine resistance transporter (CRT) 326S and 356T
- *Plasmodium falciparum* multidrug resistance protein 2 (MDR2) 484I
- *Plasmodium falciparum* protein phosphatase (PPH) 1157L
- putative phosphoinositide-binding protein (PIB7) 1484F

However, ferredoxin (FD) 193Y polymorphisms were found in 13 K13 561H isolates in Kagera (**Table S4, p.9**).

**Table S1. Antimalarial resistance polymorphisms for partner and chemoprevention agents reported (Adapted from <sup>10-12</sup>)**

| <b>Protein</b>                           | <b>Mutation/Haplotype</b>                                                                                                                                                                | <b>Drug</b>                 | <b>Impact</b>                                                                                                                                                                                                         |
|------------------------------------------|------------------------------------------------------------------------------------------------------------------------------------------------------------------------------------------|-----------------------------|-----------------------------------------------------------------------------------------------------------------------------------------------------------------------------------------------------------------------|
| Chloroquine resistance transporter (CRT) | 76T                                                                                                                                                                                      | Chloroquine and Amodiaquine | Heme detoxification in digestive vacuole                                                                                                                                                                              |
| Multidrug resistance protein 1 (MDR1)    | N86-184F-D1246 Haplotype                                                                                                                                                                 | Lumefantrine                | Potentially the inhibition of hemoglobin import and/or heme detoxification                                                                                                                                            |
| Dihydropteroate synthase (DHPS)          | 437G, 540E, 581G                                                                                                                                                                         | Sulfadoxine                 | Enzyme kinetics of folate biosynthesis in the parasite cytosol                                                                                                                                                        |
| Dihydrofolate reductase (DHFR)           | 51I, 59R, 108N, 164L                                                                                                                                                                     | Pyrimethamine               | Enzyme kinetics of folate biosynthesis in the parasite cytosol                                                                                                                                                        |
| Kelch 13 (K13)                           | WHO validated/candidate mutations <sup>13</sup><br><br>[446I, 553L, 441L, 537I/D, 458Y, 561H, 449A, 538V, 476I, 574L, 469F/, 568G, 493H, 580Y, 481V, 622I, 539T, 515K, 675V, 543T, 527H] | Artemisinin derivatives     | Alter ubiquitination patterns and help parasites to resist accumulation of polyubiquitinated proteins and decrease hemoglobin uptake at the cytosome, leading to decreased artemisinin activation in the food vacuole |

**Table S2. Participant characteristics.**

| Variable                                 |                        | Attempted Parasitemias<br>(n= 7,782) | Successful Parasitemias<br>(n=6,855) |
|------------------------------------------|------------------------|--------------------------------------|--------------------------------------|
| Gender, n (%)                            | Female                 | 3,600 (46.3%)                        | 3,175 (46.3%)                        |
|                                          | Male                   | 3,149 (40.5%)                        | 2,771 (40.4%)                        |
|                                          | Unknown                | 1033 (13.3%)                         | 909 (13.3%)                          |
| Age, years (SD)                          |                        | 15.8 (16.5)                          | 15.7 (16.3)                          |
| Age Distribution, n (%)*                 | Adult                  | 2,544 (32.7%)                        | 2,247 (32.8%)                        |
|                                          | School Children        | 1,683 (21.6%)                        | 1533 (22.4%)                         |
|                                          | Young Children         | 2,498 (32.1%)                        | 2,147 (31.3%)                        |
|                                          | Unknown                | 1,057 (13.6%)                        | 928 (13.5%)                          |
| Fever in Last 48 hours, n (%)            | Yes                    | 6,257 (80.4%)                        | 5496 (80.2%)                         |
|                                          | No                     | 435 (5.6%)                           | 398 (5.8%)                           |
|                                          | Unknown                | 1090 (14.0%)                         | 961 (14.0%)                          |
| Malaria Test in Last 14 Days, n (%)      | Yes                    | 238 (3.1%)                           | 193 (2.8%)                           |
|                                          | No                     | 6,490 (83.4%)                        | 5,734 (83.6%)                        |
|                                          | Unknown                | 1054 (13.5%)                         | 928 (13.5%)                          |
| Malaria Treatment in Last 14 Days, n (%) | Yes                    | 253 (3.3%)                           | 203 (3.0%)                           |
|                                          | No                     | 6461 (83.0%)                         | 5,711 (83.3%)                        |
|                                          | Unknown                | 1068 (13.7%)                         | 941 (13.7%)                          |
| RDT Result, n (%)                        | Positive               | 7,727 (99.3%)                        | 6,830 (99.6%)                        |
|                                          | Negative               | 55 (0.7%)                            | 25 (0.4%)                            |
| Region, n (%)                            | Kigoma (Community)     | 166 (2.1%)                           | 163 (2.4%)                           |
|                                          | Ruvuma (Community)     | 202 (2.6%)                           | 198 (2.9%)                           |
|                                          | Tanga (Community)      | 265 (3.4%)                           | 215 (3.1%)                           |
|                                          | Dar Es Salaam (Clinic) | 570 (7.3%)                           | 477 (7.0%)                           |
|                                          | Dodoma (Clinic)        | 594 (7.6%)                           | 528 (7.7%)                           |
|                                          | Kagera (Clinic)        | 988 (12.7%)                          | 941 (13.7%)                          |
|                                          | Kilimanjaro (Clinic)   | 583 (7.5%)                           | 449 (6.6%)                           |
|                                          | Manyara (Clinic)       | 557 (7.2%)                           | 489 (7.1%)                           |
|                                          | Mara (Clinic)          | 918 (11.8%)                          | 791 (11.5%)                          |

|  |                        |                    |                    |
|--|------------------------|--------------------|--------------------|
|  | <b>Mtwara (Clinic)</b> | <b>882 (11.3%)</b> | <b>699 (10.2%)</b> |
|  | <b>Njombe (Clinic)</b> | <b>573 (7.4%)</b>  | <b>548 (8.0%)</b>  |
|  | <b>Songwe (Clinic)</b> | <b>620 (8.0%)</b>  | <b>581 (8.5%)</b>  |
|  | <b>Tabora (Clinic)</b> | <b>864 (11.1%)</b> | <b>776 (11.3%)</b> |

\* Age Distributions: Young Children <5 years of age; School Children 5-16 years of age; Adults >16 years of age<sup>1</sup>

**Table S3. Public genomes used in the analysis.**

| <b>Southeast Asia Samples</b> | <b>Rwanda Samples</b> |
|-------------------------------|-----------------------|
| PD0068-C                      | ERX4235773            |
| PD0079-C                      | ERX4235772            |
| PD0126-C                      | ERX4235771            |
| PD0481-C                      | ERX4235770            |
| PD0495-C                      | ERX4235769            |
| PD0562-C                      | ERX4235768            |
| PD0565-C                      | ERX4235767            |
| PD0799-C                      | ERX4235766            |
| PD0800-C                      | ERX4235765            |
| PD0819-C                      | ERX4235764            |
| PD0822-C                      | ERX4235763            |
| PD0823-C                      | ERX4235762            |
| PD0824-C                      | ERX4235761            |
| PD0826-C                      | ERX4235760            |
| PD0828-C                      | ERX4235759            |
| PD0832-C                      | ERX4235758            |
| PD0876-C                      | ERX4235757            |
| PD0877-C                      | ERX4235756            |
| QC0184-C                      | ERX4235755            |
| QC0185-C                      | ERX4235754            |
| QC0250-C                      | ERX4235753            |
| RCN03272                      | ERX4235752            |
| RCN03319                      | ERX4235751            |
| RCN03339                      | ERX4235750            |
| RCN03348                      | ERX4235749            |
| RCN03388                      |                       |
| RCN03502                      |                       |
| RCN03510                      |                       |
| RCN03535                      |                       |
| RCN09301                      |                       |
| RCN09302                      |                       |
| RCN09312                      |                       |
| RCN09313                      |                       |
| RCN09314                      |                       |
| RCN09316                      |                       |
| RCN09317                      |                       |
| RCN09319                      |                       |



|          |  |
|----------|--|
| RCN09326 |  |
| RCN09329 |  |
| RCN09340 |  |
| RCN09399 |  |
| RCN09402 |  |
| RCN09466 |  |
| RCN09486 |  |
| RCN09489 |  |
| RCN09503 |  |
| RCN09544 |  |
| RCN09571 |  |
| RCN09580 |  |
| RCN09592 |  |
| RCN09602 |  |
| RCN09658 |  |
| RCN09677 |  |
| RCN09694 |  |
| RCN09716 |  |
| RCN09812 |  |
| RCN09828 |  |
| RCN09832 |  |
| RCN09845 |  |
| RCN09935 |  |
| RCN09954 |  |
| RCN09963 |  |
| RCN09964 |  |
| RCN09979 |  |
| RCN09989 |  |
| RCN10002 |  |
| RCN10007 |  |
| RCN10008 |  |
| RCN10009 |  |
| RCN10019 |  |
| RCN12401 |  |
| RCN12402 |  |
| RCN12403 |  |
| RCN12404 |  |

**Table S4. Mutations in antimalarial resistance genes.** Only mutations with a UMI coverage of 10, a UMI alternate count of 3, and presence in at least three samples are represented here. The first row for each mutation is a prevalence fraction showing the number of samples with alternate UMIs above the alternate UMI threshold (numerator), and the total number of samples with a coverage above the coverage UMI threshold (denominator). The second row is a percentage representation of the fraction from the first row. The third row is a 90% confidence interval for the percentages of the second row.

| Mutation         | Dar Es Salaam | Dodoma      | Kagera      | Kigoma       | Kilimanjaro | Manyara     | Mara        | Mtwara      | Njombe      | Ruvuma        | Songwe      | Tabora      | Tanga       | Overall     |
|------------------|---------------|-------------|-------------|--------------|-------------|-------------|-------------|-------------|-------------|---------------|-------------|-------------|-------------|-------------|
| PI4K-Asn957His   | 38/43         | 82/88       | 345/399     | 9/11         | 130/141     | 75/83       | 129/151     | 71/76       | 185/205     | 30/30         | 176/202     | 36/43       | 19/23       | 1325/1495   |
|                  | 88.4%         | 93.2%       | 86.5%       | 81.8%        | 92.2%       | 90.4%       | 85.4%       | 93.4%       | 90.2%       | 100.0%        | 87.1%       | 83.7%       | 82.6%       | 88.6%       |
|                  | 80.3%-96.4%   | 88.8%-97.6% | 83.6%-89.3% | 62.7%-100.0% | 88.5%-95.9% | 85.0%-95.7% | 80.7%-90.2% | 88.7%-98.1% | 86.8%-93.7% | 100.0%-100.0% | 83.3%-91.0% | 74.5%-93.0% | 69.6%-95.6% | 87.3%-90.0% |
| PI4K-Asn968Lys   | 0/43          | 0/88        | 1/399       | 0/11         | 0/141       | 0/83        | 0/151       | 0/76        | 1/205       | 0/30          | 0/202       | 1/43        | 0/23        | 3/1495      |
|                  | 0.0%          | 0.0%        | 0.3%        | 0.0%         | 0.0%        | 0.0%        | 0.0%        | 0.0%        | 0.5%        | 0.0%          | 0.0%        | 2.3%        | 0.0%        | 0.2%        |
|                  | 0.0%-0.0%     | 0.0%-0.0%   | 0.0%-0.7%   | 0.0%-0.0%    | 0.0%-0.0%   | 0.0%-0.0%   | 0.0%-0.0%   | 0.0%-0.0%   | 0.0%-1.3%   | 0.0%-0.0%     | 0.0%-0.0%   | 0.0%-6.1%   | 0.0%-0.0%   | 0.0%-0.4%   |
| PI4K-Asp954Asn   | 0/43          | 1/88        | 0/399       | 0/11         | 0/141       | 0/83        | 0/151       | 0/76        | 1/205       | 0/30          | 1/202       | 0/43        | 0/23        | 3/1495      |
|                  | 0.0%          | 1.1%        | 0.0%        | 0.0%         | 0.0%        | 0.0%        | 0.0%        | 0.0%        | 0.5%        | 0.0%          | 0.5%        | 0.0%        | 0.0%        | 0.2%        |
|                  | 0.0%-0.0%     | 0.0%-3.0%   | 0.0%-0.0%   | 0.0%-0.0%    | 0.0%-0.0%   | 0.0%-0.0%   | 0.0%-0.0%   | 0.0%-0.0%   | 0.0%-1.3%   | 0.0%-0.0%     | 0.0%-1.3%   | 0.0%-0.0%   | 0.0%-0.0%   | 0.0%-0.4%   |
| PI4K-Ile876Val   | 3/6           | 37/64       | 149/248     | 0/1          | 82/122      | 26/53       | 77/118      | 9/23        | 69/122      | 12/15         | 34/77       | 10/19       | 2/5         | 510/873     |
|                  | 50.0%         | 57.8%       | 60.1%       | 0.0%         | 67.2%       | 49.1%       | 65.3%       | 39.1%       | 56.6%       | 80.0%         | 44.2%       | 52.6%       | 40.0%       | 58.4%       |
|                  | 16.4%-83.6%   | 47.7%-68.0% | 55.0%-65.2% | 0.0%-0.0%    | 60.2%-74.2% | 37.8%-60.4% | 58.0%-72.5% | 22.4%-55.9% | 49.2%-63.9% | 63.0%-97.0%   | 34.8%-53.5% | 33.8%-71.5% | 4.0%-76.0%  | 55.7%-61.2% |
| PI4K-Lys905Asn   | 0/6           | 0/64        | 0/248       | 0/1          | 2/122       | 1/53        | 0/118       | 1/23        | 4/122       | 0/15          | 0/77        | 0/19        | 0/5         | 8/873       |
|                  | 0.0%          | 0.0%        | 0.0%        | 0.0%         | 1.6%        | 1.9%        | 0.0%        | 4.3%        | 3.3%        | 0.0%          | 0.0%        | 0.0%        | 0.0%        | 0.9%        |
|                  | 0.0%-0.0%     | 0.0%-0.0%   | 0.0%-0.0%   | 0.0%-0.0%    | 0.0%-3.5%   | 0.0%-5.0%   | 0.0%-0.0%   | 0.0%-11.3%  | 0.6%-5.9%   | 0.0%-0.0%     | 0.0%-0.0%   | 0.0%-0.0%   | 0.0%-0.0%   | 0.4%-1.4%   |
| PI4K-Lys927Thr   | 1/60          | 0/104       | 1/430       | 0/12         | 1/154       | 0/95        | 1/165       | 2/88        | 1/231       | 0/35          | 0/232       | 0/51        | 0/28        | 7/1685      |
|                  | 1.7%          | 0.0%        | 0.2%        | 0.0%         | 0.6%        | 0.0%        | 0.6%        | 2.3%        | 0.4%        | 0.0%          | 0.0%        | 0.0%        | 0.0%        | 0.4%        |
|                  | 0.0%-4.4%     | 0.0%-0.0%   | 0.0%-0.6%   | 0.0%-0.0%    | 0.0%-1.7%   | 0.0%-0.0%   | 0.0%-1.6%   | 0.0%-4.9%   | 0.0%-1.1%   | 0.0%-0.0%     | 0.0%-0.0%   | 0.0%-0.0%   | 0.0%-0.0%   | 0.2%-0.7%   |
| PI4K-Ser936Asn   | 1/60          | 2/104       | 1/430       | 0/12         | 1/154       | 1/95        | 0/165       | 0/88        | 0/231       | 0/35          | 0/232       | 0/51        | 0/28        | 6/1685      |
|                  | 1.7%          | 1.9%        | 0.2%        | 0.0%         | 0.6%        | 1.1%        | 0.0%        | 0.0%        | 0.0%        | 0.0%          | 0.0%        | 0.0%        | 0.0%        | 0.4%        |
|                  | 0.0%-4.4%     | 0.0%-4.1%   | 0.0%-0.6%   | 0.0%-0.0%    | 0.0%-1.7%   | 0.0%-2.8%   | 0.0%-0.0%   | 0.0%-0.0%   | 0.0%-0.0%   | 0.0%-0.0%     | 0.0%-0.0%   | 0.0%-0.0%   | 0.0%-0.0%   | 0.1%-0.6%   |
| PI4K-Tyr883His   | 2/6           | 38/64       | 139/248     | 0/1          | 76/122      | 28/53       | 68/118      | 10/23       | 70/122      | 10/15         | 39/77       | 8/19        | 2/5         | 490/873     |
|                  | 33.3%         | 59.4%       | 56.0%       | 0.0%         | 62.3%       | 52.8%       | 57.6%       | 43.5%       | 57.4%       | 66.7%         | 50.6%       | 42.1%       | 40.0%       | 56.1%       |
|                  | 1.7%-65.0%    | 49.3%-69.5% | 50.9%-61.2% | 0.0%-0.0%    | 55.1%-69.5% | 41.6%-64.1% | 50.1%-65.1% | 26.5%-60.5% | 50.0%-64.7% | 46.6%-86.7%   | 41.3%-60.0% | 23.5%-60.7% | 4.0%-76.0%  | 53.4%-58.9% |
| PI4K-Val951Gly   | 0/43          | 0/88        | 4/399       | 0/11         | 0/141       | 0/83        | 0/151       | 0/76        | 0/205       | 0/30          | 0/202       | 0/43        | 0/23        | 4/1495      |
|                  | 0.0%          | 0.0%        | 1.0%        | 0.0%         | 0.0%        | 0.0%        | 0.0%        | 0.0%        | 0.0%        | 0.0%          | 0.0%        | 0.0%        | 0.0%        | 0.3%        |
|                  | 0.0%-0.0%     | 0.0%-0.0%   | 0.2%-1.8%   | 0.0%-0.0%    | 0.0%-0.0%   | 0.0%-0.0%   | 0.0%-0.0%   | 0.0%-0.0%   | 0.0%-0.0%   | 0.0%-0.0%     | 0.0%-0.0%   | 0.0%-0.0%   | 0.0%-0.0%   | 0.0%-0.5%   |
| PI4K-Val972Met   | 0/43          | 2/88        | 3/399       | 0/11         | 0/141       | 0/83        | 1/151       | 1/76        | 1/205       | 0/30          | 1/202       | 2/43        | 0/23        | 11/1495     |
|                  | 0.0%          | 2.3%        | 0.8%        | 0.0%         | 0.0%        | 0.0%        | 0.7%        | 1.3%        | 0.5%        | 0.0%          | 0.5%        | 4.7%        | 0.0%        | 0.7%        |
|                  | 0.0%-0.0%     | 0.0%-4.9%   | 0.0%-1.5%   | 0.0%-0.0%    | 0.0%-0.0%   | 0.0%-0.0%   | 0.0%-1.7%   | 0.0%-3.5%   | 0.0%-1.3%   | 0.0%-0.0%     | 0.0%-1.3%   | 0.0%-9.9%   | 0.0%-0.0%   | 0.4%-1.1%   |
| Pfp2mu-Ala236Thr | 1/39          | 3/74        | 17/326      | 0/10         | 11/141      | 2/67        | 4/138       | 1/85        | 9/172       | 0/26          | 1/147       | 1/27        | 2/23        | 52/1275     |
|                  | 2.6%          | 4.1%        | 5.2%        | 0.0%         | 7.8%        | 3.0%        | 2.9%        | 1.2%        | 5.2%        | 0.0%          | 0.7%        | 3.7%        | 8.7%        | 4.1%        |
|                  | 0.0%-6.7%     | 0.3%-7.8%   | 3.2%-7.2%   | 0.0%-0.0%    | 4.1%-11.5%  | 0.0%-6.4%   | 0.5%-5.2%   | 0.0%-3.1%   | 2.4%-8.0%   | 0.0%-0.0%     | 0.0%-1.8%   | 0.0%-9.7%   | 0.0%-18.4%  | 3.2%-5.0%   |
| Pfp2mu-Ala337Ser | 1/67          | 0/96        | 1/403       | 0/8          | 1/137       | 0/88        | 1/141       | 0/90        | 0/199       | 0/27          | 1/208       | 0/50        | 0/16        | 5/1530      |
|                  | 1.5%          | 0.0%        | 0.2%        | 0.0%         | 0.7%        | 0.0%        | 0.7%        | 0.0%        | 0.0%        | 0.0%          | 0.5%        | 0.0%        | 0.0%        | 0.3%        |
|                  | 0.0%-3.9%     | 0.0%-0.0%   | 0.0%-0.7%   | 0.0%-0.0%    | 0.0%-1.9%   | 0.0%-0.0%   | 0.0%-1.9%   | 0.0%-0.0%   | 0.0%-0.0%   | 0.0%-0.0%     | 0.0%-1.3%   | 0.0%-0.0%   | 0.0%-0.0%   | 0.1%-0.6%   |

|                    |             |             |             |             |             |            |            |            |             |            |             |            |            |             |
|--------------------|-------------|-------------|-------------|-------------|-------------|------------|------------|------------|-------------|------------|-------------|------------|------------|-------------|
| Pfp2mu-Ala337Thr   | 2/67        | 0/96        | 0/403       | 0/8         | 0/137       | 0/88       | 1/141      | 0/90       | 0/199       | 0/27       | 0/208       | 0/50       | 0/16       | 3/1530      |
|                    | 3.0%        | 0.0%        | 0.0%        | 0.0%        | 0.0%        | 0.0%       | 0.7%       | 0.0%       | 0.0%        | 0.0%       | 0.0%        | 0.0%       | 0.0%       | 0.2%        |
|                    | 0.0%-6.4%   | 0.0%-0.0%   | 0.0%-0.0%   | 0.0%-0.0%   | 0.0%-0.0%   | 0.0%-0.0%  | 0.0%-1.9%  | 0.0%-0.0%  | 0.0%-0.0%   | 0.0%-0.0%  | 0.0%-0.0%   | 0.0%-0.0%  | 0.0%-0.0%  | 0.0%-0.4%   |
| Pfp2mu-Arg146Lys   | 0/51        | 1/72        | 10/344      | 0/4         | 1/113       | 4/63       | 3/113      | 1/73       | 0/152       | 0/17       | 2/162       | 2/24       | 0/11       | 24/1199     |
|                    | 0.0%        | 1.4%        | 2.9%        | 0.0%        | 0.9%        | 6.3%       | 2.7%       | 1.4%       | 0.0%        | 0.0%       | 1.2%        | 8.3%       | 0.0%       | 2.0%        |
|                    | 0.0%-0.0%   | 0.0%-3.7%   | 1.4%-4.4%   | 0.0%-0.0%   | 0.0%-2.3%   | 1.3%-11.4% | 0.2%-5.1%  | 0.0%-3.6%  | 0.0%-0.0%   | 0.0%-0.0%  | 0.0%-2.7%   | 0.0%-17.6% | 0.0%-0.0%  | 1.3%-2.7%   |
| Pfp2mu-Asn200Tyr   | 3/31        | 2/68        | 2/298       | 1/4         | 1/128       | 0/58       | 3/131      | 2/76       | 1/132       | 0/20       | 0/122       | 0/21       | 0/14       | 15/1103     |
|                    | 9.7%        | 2.9%        | 0.7%        | 25.0%       | 0.8%        | 0.0%       | 2.3%       | 2.6%       | 0.8%        | 0.0%       | 0.0%        | 0.0%       | 0.0%       | 1.4%        |
|                    | 0.9%-18.4%  | 0.0%-6.3%   | 0.0%-1.4%   | 0.0%-60.6%  | 0.0%-2.1%   | 0.0%-0.0%  | 0.1%-4.4%  | 0.0%-5.7%  | 0.0%-2.0%   | 0.0%-0.0%  | 0.0%-0.0%   | 0.0%-0.0%  | 0.0%-0.0%  | 0.8%-1.9%   |
| Pfp2mu-Asn233Lys   | 1/39        | 1/74        | 2/326       | 0/10        | 2/141       | 0/67       | 0/138      | 0/85       | 0/172       | 0/26       | 3/146       | 0/27       | 0/23       | 9/1274      |
|                    | 2.6%        | 1.4%        | 0.6%        | 0.0%        | 1.4%        | 0.0%       | 0.0%       | 0.0%       | 0.0%        | 0.0%       | 2.1%        | 0.0%       | 0.0%       | 0.7%        |
|                    | 0.0%-6.7%   | 0.0%-3.6%   | 0.0%-1.3%   | 0.0%-0.0%   | 0.0%-3.1%   | 0.0%-0.0%  | 0.0%-0.0%  | 0.0%-0.0%  | 0.0%-0.0%   | 0.0%-0.0%  | 0.1%-4.0%   | 0.0%-0.0%  | 0.0%-0.0%  | 0.3%-1.1%   |
| Pfp2mu-Gly315Ser   | 0/41        | 0/75        | 1/348       | 0/3         | 1/117       | 0/65       | 2/119      | 1/79       | 0/151       | 0/20       | 0/153       | 2/34       | 0/7        | 7/1212      |
|                    | 0.0%        | 0.0%        | 0.3%        | 0.0%        | 0.9%        | 0.0%       | 1.7%       | 1.3%       | 0.0%        | 0.0%       | 0.0%        | 5.9%       | 0.0%       | 0.6%        |
|                    | 0.0%-0.0%   | 0.0%-0.0%   | 0.0%-0.8%   | 0.0%-0.0%   | 0.0%-2.3%   | 0.0%-0.0%  | 0.0%-3.6%  | 0.0%-3.3%  | 0.0%-0.0%   | 0.0%-0.0%  | 0.0%-0.0%   | 0.0%-12.5% | 0.0%-0.0%  | 0.2%-0.9%   |
| Pfp2mu-Lys199Thr   | 8/31        | 12/68       | 29/298      | 0/4         | 18/128      | 6/58       | 14/131     | 3/76       | 29/132      | 2/20       | 20/122      | 2/21       | 4/14       | 147/1103    |
|                    | 25.8%       | 17.6%       | 9.7%        | 0.0%        | 14.1%       | 10.3%      | 10.7%      | 3.9%       | 22.0%       | 10.0%      | 16.4%       | 9.5%       | 28.6%      | 13.3%       |
|                    | 12.9%-38.7% | 10.0%-25.3% | 6.9%-12.6%  | 0.0%-0.0%   | 9.0%-19.1%  | 3.8%-16.9% | 6.2%-15.1% | 0.3%-7.6%  | 16.0%-27.9% | 0.0%-21.0% | 10.9%-21.9% | 0.0%-20.1% | 8.7%-48.4% | 11.6%-15.0% |
| Pfp2mu-Phe437Leu   | 0/1         | 2/70        | 5/271       | 0/2         | 4/134       | 2/54       | 1/123      | 0/30       | 0/128       | 0/25       | 2/104       | 0/20       | 2/15       | 18/977      |
|                    | 0.0%        | 2.9%        | 1.8%        | 0.0%        | 3.0%        | 3.7%       | 0.8%       | 0.0%       | 0.0%        | 0.0%       | 1.9%        | 0.0%       | 13.3%      | 1.8%        |
|                    | 0.0%-0.0%   | 0.0%-6.1%   | 0.5%-3.2%   | 0.0%-0.0%   | 0.6%-5.4%   | 0.0%-7.9%  | 0.0%-2.1%  | 0.0%-0.0%  | 0.0%-0.0%   | 0.0%-0.0%  | 0.0%-4.1%   | 0.0%-0.0%  | 0.0%-27.8% | 1.1%-2.6%   |
| Pfp2mu-Ser160Asn   | 6/51        | 6/72        | 67/344      | 0/4         | 22/113      | 7/63       | 16/113     | 8/72       | 32/152      | 1/17       | 18/162      | 5/24       | 3/11       | 191/1198    |
|                    | 11.8%       | 8.3%        | 19.5%       | 0.0%        | 19.5%       | 11.1%      | 14.2%      | 11.1%      | 21.1%       | 5.9%       | 11.1%       | 20.8%      | 27.3%      | 15.9%       |
|                    | 4.3%-19.2%  | 3.0%-13.7%  | 16.0%-23.0% | 0.0%-0.0%   | 13.3%-25.6% | 4.6%-17.6% | 8.8%-19.6% | 5.0%-17.2% | 15.6%-26.5% | 0.0%-15.3% | 7.0%-15.2%  | 7.2%-34.5% | 5.2%-49.4% | 14.2%-17.7% |
| Pfp2mu-Ser160Thr   | 0/51        | 0/72        | 3/344       | 0/4         | 0/113       | 0/63       | 9/113      | 2/72       | 0/152       | 0/17       | 3/162       | 1/24       | 0/11       | 18/1198     |
|                    | 0.0%        | 0.0%        | 0.9%        | 0.0%        | 0.0%        | 0.0%       | 8.0%       | 2.8%       | 0.0%        | 0.0%       | 1.9%        | 4.2%       | 0.0%       | 1.5%        |
|                    | 0.0%-0.0%   | 0.0%-0.0%   | 0.0%-1.7%   | 0.0%-0.0%   | 0.0%-0.0%   | 0.0%-0.0%  | 3.8%-12.2% | 0.0%-6.0%  | 0.0%-0.0%   | 0.0%-0.0%  | 0.1%-3.6%   | 0.0%-10.9% | 0.0%-0.0%  | 0.9%-2.1%   |
| Pfp2mu-Ser326Cys   | 1/41        | 0/75        | 0/348       | 0/3         | 1/117       | 0/65       | 0/119      | 0/79       | 0/151       | 1/20       | 0/153       | 0/34       | 0/7        | 3/1212      |
|                    | 2.4%        | 0.0%        | 0.0%        | 0.0%        | 0.9%        | 0.0%       | 0.0%       | 0.0%       | 0.0%        | 5.0%       | 0.0%        | 0.0%       | 0.0%       | 0.2%        |
|                    | 0.0%-6.4%   | 0.0%-0.0%   | 0.0%-0.0%   | 0.0%-0.0%   | 0.0%-2.3%   | 0.0%-0.0%  | 0.0%-0.0%  | 0.0%-0.0%  | 0.0%-0.0%   | 0.0%-13.0% | 0.0%-0.0%   | 0.0%-0.0%  | 0.0%-0.0%  | 0.0%-0.5%   |
| Pfp2mu-Ser476Ala   | 0/40        | 0/77        | 1/390       | 0/9         | 1/136       | 0/61       | 5/146      | 0/81       | 1/185       | 0/29       | 2/193       | 0/39       | 0/20       | 10/1406     |
|                    | 0.0%        | 0.0%        | 0.3%        | 0.0%        | 0.7%        | 0.0%       | 3.4%       | 0.0%       | 0.5%        | 0.0%       | 1.0%        | 0.0%       | 0.0%       | 0.7%        |
|                    | 0.0%-0.0%   | 0.0%-0.0%   | 0.0%-0.7%   | 0.0%-0.0%   | 0.0%-1.9%   | 0.0%-0.0%  | 0.9%-5.9%  | 0.0%-0.0%  | 0.0%-1.4%   | 0.0%-0.0%  | 0.0%-2.2%   | 0.0%-0.0%  | 0.0%-0.0%  | 0.3%-1.1%   |
| Pfp2mu-Ser508Cys   | 0/33        | 0/66        | 3/346       | 0/6         | 0/114       | 0/56       | 0/127      | 0/71       | 1/165       | 0/21       | 0/163       | 0/34       | 0/10       | 4/1212      |
|                    | 0.0%        | 0.0%        | 0.9%        | 0.0%        | 0.0%        | 0.0%       | 0.0%       | 0.0%       | 0.6%        | 0.0%       | 0.0%        | 0.0%       | 0.0%       | 0.3%        |
|                    | 0.0%-0.0%   | 0.0%-0.0%   | 0.0%-1.7%   | 0.0%-0.0%   | 0.0%-0.0%   | 0.0%-0.0%  | 0.0%-0.0%  | 0.0%-0.0%  | 0.0%-1.6%   | 0.0%-0.0%  | 0.0%-0.0%   | 0.0%-0.0%  | 0.0%-0.0%  | 0.1%-0.6%   |
| Pfpubp1-Ala1084Thr | 0/30        | 0/72        | 1/311       | 0/4         | 1/128       | 0/57       | 0/127      | 0/76       | 0/137       | 1/22       | 0/117       | 0/22       | 0/13       | 3/1116      |
|                    | 0.0%        | 0.0%        | 0.3%        | 0.0%        | 0.8%        | 0.0%       | 0.0%       | 0.0%       | 0.0%        | 4.5%       | 0.0%        | 0.0%       | 0.0%       | 0.3%        |
|                    | 0.0%-0.0%   | 0.0%-0.0%   | 0.0%-0.8%   | 0.0%-0.0%   | 0.0%-2.1%   | 0.0%-0.0%  | 0.0%-0.0%  | 0.0%-0.0%  | 0.0%-0.0%   | 0.0%-11.9% | 0.0%-0.0%   | 0.0%-0.0%  | 0.0%-0.0%  | 0.0%-0.5%   |
| Pfpubp1-Ala1883Thr | 2/251       | 0/278       | 3/629       | 0/39        | 0/234       | 0/291      | 0/350      | 0/302      | 0/343       | 0/63       | 0/395       | 1/407      | 0/68       | 6/3650      |
|                    | 0.8%        | 0.0%        | 0.5%        | 0.0%        | 0.0%        | 0.0%       | 0.0%       | 0.0%       | 0.0%        | 0.0%       | 0.0%        | 0.2%       | 0.0%       | 0.2%        |
|                    | 0.0%-1.7%   | 0.0%-0.0%   | 0.0%-0.9%   | 0.0%-0.0%   | 0.0%-0.0%   | 0.0%-0.0%  | 0.0%-0.0%  | 0.0%-0.0%  | 0.0%-0.0%   | 0.0%-0.0%  | 0.0%-0.0%   | 0.0%-0.6%  | 0.0%-0.0%  | 0.1%-0.3%   |
| Pfpubp1-Arg1133Ser | 14/25       | 34/61       | 218/334     | no coverage | 65/105      | 25/49      | 76/111     | 40/60      | 102/149     | 15/20      | 94/151      | 11/18      | 1/2        | 695/1085    |
|                    | 56.0%       | 55.7%       | 65.3%       | no coverage | 61.9%       | 51.0%      | 68.5%      | 66.7%      | 68.5%       | 75.0%      | 62.3%       | 61.1%      | 50.0%      | 64.1%       |

|                   |              |             |             |              |             |              |             |             |             |               |             |              |              |             |
|-------------------|--------------|-------------|-------------|--------------|-------------|--------------|-------------|-------------|-------------|---------------|-------------|--------------|--------------|-------------|
|                   | 39.7%-72.3%  | 45.3%-66.2% | 61.0%-69.6% | no coverage  | 54.1%-69.7% | 39.3%-62.8%  | 61.2%-75.7% | 56.7%-76.7% | 62.2%-74.7% | 59.1%-90.9%   | 55.8%-68.7% | 42.2%-80.0%  | 0.0%-100.0%  | 61.7%-66.5% |
| Pfubp1-Arg1205Cys | 0/130        | 0/144       | 1/515       | 0/11         | 0/149       | 0/162        | 3/162       | 0/125       | 0/252       | 0/30          | 0/287       | 0/136        | 0/16         | 4/2119      |
|                   | 0.0%         | 0.0%        | 0.2%        | 0.0%         | 0.0%        | 0.0%         | 1.9%        | 0.0%        | 0.0%        | 0.0%          | 0.0%        | 0.0%         | 0.0%         | 0.2%        |
|                   | 0.0%-0.0%    | 0.0%-0.0%   | 0.0%-0.5%   | 0.0%-0.0%    | 0.0%-0.0%   | 0.0%-0.0%    | 0.1%-3.6%   | 0.0%-0.0%   | 0.0%-0.0%   | 0.0%-0.0%     | 0.0%-0.0%   | 0.0%-0.0%    | 0.0%-0.0%    | 0.0%-0.3%   |
| Pfubp1-Arg1205His | 4/161        | 0/171       | 0/562       | 0/17         | 0/183       | 0/185        | 0/209       | 0/149       | 0/299       | 0/41          | 0/343       | 0/174        | 0/38         | 4/2532      |
|                   | 2.5%         | 0.0%        | 0.0%        | 0.0%         | 0.0%        | 0.0%         | 0.0%        | 0.0%        | 0.0%        | 0.0%          | 0.0%        | 0.0%         | 0.0%         | 0.2%        |
|                   | 0.5%-4.5%    | 0.0%-0.0%   | 0.0%-0.0%   | 0.0%-0.0%    | 0.0%-0.0%   | 0.0%-0.0%    | 0.0%-0.0%   | 0.0%-0.0%   | 0.0%-0.0%   | 0.0%-0.0%     | 0.0%-0.0%   | 0.0%-0.0%    | 0.0%-0.0%    | 0.0%-0.3%   |
| Pfubp1-Arg2226Lys | 0/1          | 0/62        | 1/221       | no coverage  | 2/111       | 0/47         | 3/104       | no coverage | 0/87        | 0/17          | 0/65        | 0/17         | 0/1          | 6/733       |
|                   | 0.0%         | 0.0%        | 0.5%        | no coverage  | 1.8%        | 0.0%         | 2.9%        | no coverage | 0.0%        | 0.0%          | 0.0%        | 0.0%         | 0.0%         | 0.8%        |
|                   | 0.0%-0.0%    | 0.0%-0.0%   | 0.0%-1.2%   | no coverage  | 0.0%-3.9%   | 0.0%-0.0%    | 0.2%-5.6%   | no coverage | 0.0%-0.0%   | 0.0%-0.0%     | 0.0%-0.0%   | 0.0%-0.0%    | 0.0%-0.0%    | 0.3%-1.4%   |
| Pfubp1-Arg2238Lys | 83/85        | 111/114     | 479/488     | 11/12        | 154/157     | 108/109      | 154/164     | 103/106     | 235/238     | 38/38         | 225/233     | 57/58        | 31/31        | 1789/1833   |
|                   | 97.6%        | 97.4%       | 98.2%       | 91.7%        | 98.1%       | 99.1%        | 93.9%       | 97.2%       | 98.7%       | 100.0%        | 96.6%       | 98.3%        | 100.0%       | 97.6%       |
|                   | 94.9%-100.0% | 94.9%-99.8% | 97.2%-99.2% | 78.5%-100.0% | 96.3%-99.9% | 97.6%-100.0% | 90.8%-97.0% | 94.5%-99.8% | 97.6%-99.9% | 100.0%-100.0% | 94.6%-98.5% | 95.5%-100.0% | 00.0%-100.0% | 97.0%-98.2% |
| Pfubp1-Arg2385Thr | 0/19         | 0/77        | 3/331       | 0/7          | 0/146       | 0/68         | 0/137       | 0/28        | 0/196       | 0/37          | 0/153       | 0/22         | 0/13         | 3/1234      |
|                   | 0.0%         | 0.0%        | 0.9%        | 0.0%         | 0.0%        | 0.0%         | 0.0%        | 0.0%        | 0.0%        | 0.0%          | 0.0%        | 0.0%         | 0.0%         | 0.2%        |
|                   | 0.0%-0.0%    | 0.0%-0.0%   | 0.0%-1.8%   | 0.0%-0.0%    | 0.0%-0.0%   | 0.0%-0.0%    | 0.0%-0.0%   | 0.0%-0.0%   | 0.0%-0.0%   | 0.0%-0.0%     | 0.0%-0.0%   | 0.0%-0.0%    | 0.0%-0.0%    | 0.0%-0.5%   |
| Pfubp1-Arg2445Lys | no coverage  | 3/45        | 0/179       | no coverage  | 0/69        | 0/27         | 0/101       | 0/1         | 0/55        | 0/8           | 0/38        | 0/8          | 0/1          | 3/532       |
|                   | no coverage  | 6.7%        | 0.0%        | no coverage  | 0.0%        | 0.0%         | 0.0%        | 0.0%        | 0.0%        | 0.0%          | 0.0%        | 0.0%         | 0.0%         | 0.6%        |
|                   | no coverage  | 0.6%-12.8%  | 0.0%-0.0%   | no coverage  | 0.0%-0.0%   | 0.0%-0.0%    | 0.0%-0.0%   | 0.0%-0.0%   | 0.0%-0.0%   | 0.0%-0.0%     | 0.0%-0.0%   | 0.0%-0.0%    | 0.0%-0.0%    | 0.0%-1.1%   |
| Pfubp1-Asn101Ile  | 0/29         | 0/51        | 0/295       | no coverage  | 0/82        | 0/35         | 5/111       | 0/60        | 0/125       | 0/22          | 0/125       | 0/14         | 0/2          | 5/951       |
|                   | 0.0%         | 0.0%        | 0.0%        | no coverage  | 0.0%        | 0.0%         | 4.5%        | 0.0%        | 0.0%        | 0.0%          | 0.0%        | 0.0%         | 0.0%         | 0.5%        |
|                   | 0.0%-0.0%    | 0.0%-0.0%   | 0.0%-0.0%   | no coverage  | 0.0%-0.0%   | 0.0%-0.0%    | 1.3%-7.7%   | 0.0%-0.0%   | 0.0%-0.0%   | 0.0%-0.0%     | 0.0%-0.0%   | 0.0%-0.0%    | 0.0%-0.0%    | 0.1%-0.9%   |
| Pfubp1-Asn157Lys  | 50/192       | 51/194      | 165/560     | 6/18         | 49/181      | 72/207       | 71/229      | 50/185      | 76/294      | 11/41         | 79/352      | 55/211       | 11/40        | 746/2704    |
|                   | 26.0%        | 26.3%       | 29.5%       | 33.3%        | 27.1%       | 34.8%        | 31.0%       | 27.0%       | 25.9%       | 26.8%         | 22.4%       | 26.1%        | 27.5%        | 27.6%       |
|                   | 20.8%-31.3%  | 21.1%-31.5% | 26.3%-32.6% | 15.1%-51.6%  | 21.6%-32.5% | 29.3%-40.2%  | 26.0%-36.0% | 21.7%-32.4% | 21.7%-30.1% | 15.4%-38.2%   | 18.8%-26.1% | 21.1%-31.0%  | 15.9%-39.1%  | 26.2%-29.0% |
| Pfubp1-Asn1704Lys | 0/103        | 1/110       | 4/455       | 0/5          | 0/139       | 1/113        | 1/149       | 0/104       | 1/204       | 0/29          | 0/239       | 0/97         | 0/15         | 8/1762      |
|                   | 0.0%         | 0.9%        | 0.9%        | 0.0%         | 0.0%        | 0.9%         | 0.7%        | 0.0%        | 0.5%        | 0.0%          | 0.0%        | 0.0%         | 0.0%         | 0.5%        |
|                   | 0.0%-0.0%    | 0.0%-2.4%   | 0.2%-1.6%   | 0.0%-0.0%    | 0.0%-0.0%   | 0.0%-2.3%    | 0.0%-1.8%   | 0.0%-0.0%   | 0.0%-1.3%   | 0.0%-0.0%     | 0.0%-0.0%   | 0.0%-0.0%    | 0.0%-0.0%    | 0.2%-0.7%   |
| Pfubp1-Asn1706Lys | 3/103        | 0/110       | 0/455       | 0/5          | 1/139       | 0/113        | 1/149       | 0/104       | 0/204       | 0/29          | 0/239       | 0/97         | 0/15         | 5/1762      |
|                   | 2.9%         | 0.0%        | 0.0%        | 0.0%         | 0.7%        | 0.0%         | 0.7%        | 0.0%        | 0.0%        | 0.0%          | 0.0%        | 0.0%         | 0.0%         | 0.3%        |
|                   | 0.2%-5.6%    | 0.0%-0.0%   | 0.0%-0.0%   | 0.0%-0.0%    | 0.0%-1.9%   | 0.0%-0.0%    | 0.0%-1.8%   | 0.0%-0.0%   | 0.0%-0.0%   | 0.0%-0.0%     | 0.0%-0.0%   | 0.0%-0.0%    | 0.0%-0.0%    | 0.1%-0.5%   |
| Pfubp1-Asn1710Ser | 3/103        | 3/110       | 11/455      | 1/5          | 1/139       | 3/113        | 7/149       | 3/104       | 2/204       | 0/29          | 3/239       | 9/97         | 4/15         | 50/1762     |
|                   | 2.9%         | 2.7%        | 2.4%        | 20.0%        | 0.7%        | 2.7%         | 4.7%        | 2.9%        | 1.0%        | 0.0%          | 1.3%        | 9.3%         | 26.7%        | 2.8%        |
|                   | 0.2%-5.6%    | 0.2%-5.3%   | 1.2%-3.6%   | 0.0%-49.4%   | 0.0%-1.9%   | 0.2%-5.1%    | 1.8%-7.5%   | 0.2%-5.6%   | 0.0%-2.1%   | 0.0%-0.0%     | 0.1%-2.4%   | 4.4%-14.1%   | 7.9%-45.4%   | 2.2%-3.5%   |
| Pfubp1-Asn1712Lys | 0/103        | 0/110       | 0/455       | 0/5          | 0/139       | 0/113        | 3/149       | 0/104       | 0/204       | 0/29          | 0/239       | 0/97         | 0/15         | 3/1762      |
|                   | 0.0%         | 0.0%        | 0.0%        | 0.0%         | 0.0%        | 0.0%         | 2.0%        | 0.0%        | 0.0%        | 0.0%          | 0.0%        | 0.0%         | 0.0%         | 0.2%        |
|                   | 0.0%-0.0%    | 0.0%-0.0%   | 0.0%-0.0%   | 0.0%-0.0%    | 0.0%-0.0%   | 0.0%-0.0%    | 0.1%-3.9%   | 0.0%-0.0%   | 0.0%-0.0%   | 0.0%-0.0%     | 0.0%-0.0%   | 0.0%-0.0%    | 0.0%-0.0%    | 0.0%-0.3%   |
| Pfubp1-Asn189Lys  | 0/195        | 0/196       | 2/576       | 0/22         | 0/194       | 1/216        | 3/251       | 0/212       | 0/295       | 0/41          | 1/335       | 0/230        | 0/49         | 7/2812      |
|                   | 0.0%         | 0.0%        | 0.3%        | 0.0%         | 0.0%        | 0.5%         | 1.2%        | 0.0%        | 0.0%        | 0.0%          | 0.3%        | 0.0%         | 0.0%         | 0.2%        |
|                   | 0.0%-0.0%    | 0.0%-0.0%   | 0.0%-0.8%   | 0.0%-0.0%    | 0.0%-0.0%   | 0.0%-1.2%    | 0.1%-2.3%   | 0.0%-0.0%   | 0.0%-0.0%   | 0.0%-0.0%     | 0.0%-0.8%   | 0.0%-0.0%    | 0.0%-0.0%    | 0.1%-0.4%   |
| Pfubp1-Asn1901Tyr | 0/243        | 0/273       | 0/622       | 0/34         | 0/227       | 3/277        | 0/337       | 2/291       | 0/330       | 0/59          | 0/390       | 0/388        | 0/63         | 5/3534      |
|                   | 0.0%         | 0.0%        | 0.0%        | 0.0%         | 0.0%        | 1.1%         | 0.0%        | 0.7%        | 0.0%        | 0.0%          | 0.0%        | 0.0%         | 0.0%         | 0.1%        |
|                   | 0.0%-0.0%    | 0.0%-0.0%   | 0.0%-0.0%   | 0.0%-0.0%    | 0.0%-0.0%   | 0.1%-2.1%    | 0.0%-0.0%   | 0.0%-1.5%   | 0.0%-0.0%   | 0.0%-0.0%     | 0.0%-0.0%   | 0.0%-0.0%    | 0.0%-0.0%    | 0.0%-0.2%   |
| Pfubp1-Asn1935Lys | 1/1          | 1/2         | 11/29       | no coverage  | 0/1         | 1/2          | 8/23        | 9/13        | 1/2         | 0/1           | 5/6         | 1/1          | 1/1          | 39/82       |

|                   |               |             |             |             |            |             |             |             |             |            |              |               |              |             |
|-------------------|---------------|-------------|-------------|-------------|------------|-------------|-------------|-------------|-------------|------------|--------------|---------------|--------------|-------------|
|                   | 100.0%        | 50.0%       | 37.9%       | no coverage | 0.0%       | 50.0%       | 34.8%       | 69.2%       | 50.0%       | 0.0%       | 83.3%        | 100.0%        | 100.0%       | 47.6%       |
|                   | 100.0%-100.0% | 0.0%-100.0% | 23.1%-52.8% | no coverage | 0.0%-0.0%  | 0.0%-100.0% | 18.4%-51.1% | 48.2%-90.3% | 0.0%-100.0% | 0.0%-0.0%  | 58.3%-100.0% | 100.0%-100.0% | 00.0%-100.0% | 38.5%-56.6% |
| Pfubp1-Asn1942Lys | 1/4           | 2/29        | 27/111      | no coverage | 2/20       | 2/12        | 8/26        | 3/7         | 8/47        | 2/6        | 8/30         | 0/5           | 1/1          | 64/298      |
|                   | 25.0%         | 6.9%        | 24.3%       | no coverage | 10.0%      | 16.7%       | 30.8%       | 42.9%       | 17.0%       | 33.3%      | 26.7%        | 0.0%          | 100.0%       | 21.5%       |
|                   | 0.0%-60.6%    | 0.0%-14.6%  | 17.6%-31.0% | no coverage | 0.0%-21.0% | 0.0%-34.4%  | 15.9%-45.7% | 12.1%-73.6% | 8.0%-26.0%  | 1.7%-65.0% | 13.4%-39.9%  | 0.0%-0.0%     | 00.0%-100.0% | 17.6%-25.4% |
| Pfubp1-Asn1944Ser | 0/4           | 0/29        | 2/111       | no coverage | 0/20       | 0/12        | 0/26        | 0/7         | 0/47        | 0/6        | 1/30         | 0/5           | 0/1          | 3/298       |
|                   | 0.0%          | 0.0%        | 1.8%        | no coverage | 0.0%       | 0.0%        | 0.0%        | 0.0%        | 0.0%        | 0.0%       | 3.3%         | 0.0%          | 0.0%         | 1.0%        |
|                   | 0.0%-0.0%     | 0.0%-0.0%   | 0.0%-3.9%   | no coverage | 0.0%-0.0%  | 0.0%-0.0%   | 0.0%-0.0%   | 0.0%-0.0%   | 0.0%-0.0%   | 0.0%-0.0%  | 0.0%-8.7%    | 0.0%-0.0%     | 0.0%-0.0%    | 0.1%-2.0%   |
| Pfubp1-Asn1963Lys | 0/87          | 1/112       | 5/472       | 0/8         | 0/87       | 1/102       | 1/144       | 3/92        | 5/212       | 0/29       | 1/241        | 1/86          | 0/11         | 18/1683     |
|                   | 0.0%          | 0.9%        | 1.1%        | 0.0%        | 0.0%       | 1.0%        | 0.7%        | 3.3%        | 2.4%        | 0.0%       | 0.4%         | 1.2%          | 0.0%         | 1.1%        |
|                   | 0.0%-0.0%     | 0.0%-2.4%   | 0.3%-1.8%   | 0.0%-0.0%   | 0.0%-0.0%  | 0.0%-2.6%   | 0.0%-1.8%   | 0.2%-6.3%   | 0.6%-4.1%   | 0.0%-0.0%  | 0.0%-1.1%    | 0.0%-3.1%     | 0.0%-0.0%    | 0.7%-1.5%   |
| Pfubp1-Asn2524Ile | 0/68          | 0/97        | 2/430       | 0/9         | 1/134      | 1/94        | 0/135       | 0/85        | 0/218       | 0/26       | 1/225        | 0/57          | 0/17         | 5/1595      |
|                   | 0.0%          | 0.0%        | 0.5%        | 0.0%        | 0.7%       | 1.1%        | 0.0%        | 0.0%        | 0.0%        | 0.0%       | 0.4%         | 0.0%          | 0.0%         | 0.3%        |
|                   | 0.0%-0.0%     | 0.0%-0.0%   | 0.0%-1.0%   | 0.0%-0.0%   | 0.0%-2.0%  | 0.0%-2.8%   | 0.0%-0.0%   | 0.0%-0.0%   | 0.0%-0.0%   | 0.0%-0.0%  | 0.0%-1.2%    | 0.0%-0.0%     | 0.0%-0.0%    | 0.1%-0.5%   |
| Pfubp1-Asn274Lys  | 0/19          | 0/58        | 0/254       | 0/3         | 0/109      | 0/48        | 5/117       | 0/22        | 5/137       | 1/31       | 1/100        | 0/12          | 0/5          | 12/915      |
|                   | 0.0%          | 0.0%        | 0.0%        | 0.0%        | 0.0%       | 0.0%        | 4.3%        | 0.0%        | 3.6%        | 3.2%       | 1.0%         | 0.0%          | 0.0%         | 1.3%        |
|                   | 0.0%-0.0%     | 0.0%-0.0%   | 0.0%-0.0%   | 0.0%-0.0%   | 0.0%-0.0%  | 0.0%-0.0%   | 1.2%-7.3%   | 0.0%-0.0%   | 1.0%-6.3%   | 0.0%-8.4%  | 0.0%-2.6%    | 0.0%-0.0%     | 0.0%-0.0%    | 0.7%-1.9%   |
| Pfubp1-Asn2813Lys | 4/167         | 1/165       | 29/558      | 2/19        | 4/179      | 6/183       | 17/215      | 7/169       | 15/271      | 0/49       | 21/285       | 6/181         | 2/38         | 114/2479    |
|                   | 2.4%          | 0.6%        | 5.2%        | 10.5%       | 2.2%       | 3.3%        | 7.9%        | 4.1%        | 5.5%        | 0.0%       | 7.4%         | 3.3%          | 5.3%         | 4.6%        |
|                   | 0.4%-4.3%     | 0.0%-1.6%   | 3.7%-6.7%   | 0.0%-22.1%  | 0.4%-4.1%  | 1.1%-5.4%   | 4.9%-10.9%  | 1.6%-6.7%   | 3.3%-7.8%   | 0.0%-0.0%  | 4.8%-9.9%    | 1.1%-5.5%     | 0.0%-11.2%   | 3.9%-5.3%   |
| Pfubp1-Asn2838Ser | 0/166         | 0/164       | 4/557       | 0/18        | 0/178      | 0/182       | 1/214       | 0/169       | 0/270       | 0/48       | 0/284        | 0/181         | 0/37         | 5/2468      |
|                   | 0.0%          | 0.0%        | 0.7%        | 0.0%        | 0.0%       | 0.0%        | 0.5%        | 0.0%        | 0.0%        | 0.0%       | 0.0%         | 0.0%          | 0.0%         | 0.2%        |
|                   | 0.0%-0.0%     | 0.0%-0.0%   | 0.1%-1.3%   | 0.0%-0.0%   | 0.0%-0.0%  | 0.0%-0.0%   | 0.0%-1.2%   | 0.0%-0.0%   | 0.0%-0.0%   | 0.0%-0.0%  | 0.0%-0.0%    | 0.0%-0.0%     | 0.0%-0.0%    | 0.1%-0.4%   |
| Pfubp1-Asn2969Lys | 0/91          | 0/111       | 3/480       | 0/7         | 0/135      | 0/102       | 0/151       | 0/102       | 0/227       | 0/26       | 0/232        | 0/67          | 0/10         | 3/1741      |
|                   | 0.0%          | 0.0%        | 0.6%        | 0.0%        | 0.0%       | 0.0%        | 0.0%        | 0.0%        | 0.0%        | 0.0%       | 0.0%         | 0.0%          | 0.0%         | 0.2%        |
|                   | 0.0%-0.0%     | 0.0%-0.0%   | 0.0%-1.2%   | 0.0%-0.0%   | 0.0%-0.0%  | 0.0%-0.0%   | 0.0%-0.0%   | 0.0%-0.0%   | 0.0%-0.0%   | 0.0%-0.0%  | 0.0%-0.0%    | 0.0%-0.0%     | 0.0%-0.0%    | 0.0%-0.3%   |
| Pfubp1-Asn3054Lys | 0/132         | 0/173       | 0/552       | 0/14        | 0/169      | 0/160       | 2/196       | 0/136       | 0/275       | 0/39       | 0/331        | 1/147         | 0/25         | 3/2349      |
|                   | 0.0%          | 0.0%        | 0.0%        | 0.0%        | 0.0%       | 0.0%        | 1.0%        | 0.0%        | 0.0%        | 0.0%       | 0.0%         | 0.7%          | 0.0%         | 0.1%        |
|                   | 0.0%-0.0%     | 0.0%-0.0%   | 0.0%-0.0%   | 0.0%-0.0%   | 0.0%-0.0%  | 0.0%-0.0%   | 0.0%-2.2%   | 0.0%-0.0%   | 0.0%-0.0%   | 0.0%-0.0%  | 0.0%-0.0%    | 0.0%-1.8%     | 0.0%-0.0%    | 0.0%-0.2%   |
| Pfubp1-Asn3133Ser | 0/121         | 0/139       | 0/472       | 0/3         | 1/138      | 1/143       | 0/166       | 0/135       | 1/246       | 0/24       | 0/219        | 1/160         | 0/14         | 4/1980      |
|                   | 0.0%          | 0.0%        | 0.0%        | 0.0%        | 0.7%       | 0.7%        | 0.0%        | 0.0%        | 0.4%        | 0.0%       | 0.0%         | 0.6%          | 0.0%         | 0.2%        |
|                   | 0.0%-0.0%     | 0.0%-0.0%   | 0.0%-0.0%   | 0.0%-0.0%   | 0.0%-1.9%  | 0.0%-1.8%   | 0.0%-0.0%   | 0.0%-0.0%   | 0.0%-1.1%   | 0.0%-0.0%  | 0.0%-0.0%    | 0.0%-1.6%     | 0.0%-0.0%    | 0.0%-0.4%   |
| Pfubp1-Asn640Lys  | 2/34          | 2/72        | 7/345       | 0/12        | 3/134      | 2/60        | 10/140      | 2/70        | 0/193       | 0/29       | 4/177        | 1/28          | 0/18         | 33/1312     |
|                   | 5.9%          | 2.8%        | 2.0%        | 0.0%        | 2.2%       | 3.3%        | 7.1%        | 2.9%        | 0.0%        | 0.0%       | 2.3%         | 3.6%          | 0.0%         | 2.5%        |
|                   | 0.0%-12.5%    | 0.0%-6.0%   | 0.8%-3.3%   | 0.0%-0.0%   | 0.1%-4.3%  | 0.0%-7.1%   | 3.6%-10.7%  | 0.0%-6.1%   | 0.0%-0.0%   | 0.0%-0.0%  | 0.4%-4.1%    | 0.0%-9.3%     | 0.0%-0.0%    | 1.8%-3.2%   |
| Pfubp1-Asn749Lys  | 0/159         | 0/162       | 0/480       | 0/18        | 0/153      | 0/161       | 0/213       | 3/186       | 0/250       | 0/43       | 0/285        | 0/220         | 0/25         | 3/2355      |
|                   | 0.0%          | 0.0%        | 0.0%        | 0.0%        | 0.0%       | 0.0%        | 0.0%        | 1.6%        | 0.0%        | 0.0%       | 0.0%         | 0.0%          | 0.0%         | 0.1%        |
|                   | 0.0%-0.0%     | 0.0%-0.0%   | 0.0%-0.0%   | 0.0%-0.0%   | 0.0%-0.0%  | 0.0%-0.0%   | 0.0%-0.0%   | 0.1%-3.1%   | 0.0%-0.0%   | 0.0%-0.0%  | 0.0%-0.0%    | 0.0%-0.0%     | 0.0%-0.0%    | 0.0%-0.2%   |
| Pfubp1-Asn784Lys  | 6/112         | 8/95        | 7/346       | 0/5         | 5/83       | 11/92       | 4/133       | 5/125       | 19/179      | 0/14       | 2/204        | 6/136         | 0/4          | 73/1528     |
|                   | 5.4%          | 8.4%        | 2.0%        | 0.0%        | 6.0%       | 12.0%       | 3.0%        | 4.0%        | 10.6%       | 0.0%       | 1.0%         | 4.4%          | 0.0%         | 4.8%        |
|                   | 1.9%-8.9%     | 3.7%-13.1%  | 0.8%-3.3%   | 0.0%-0.0%   | 1.7%-10.3% | 6.4%-17.5%  | 0.6%-5.4%   | 1.1%-6.9%   | 6.8%-14.4%  | 0.0%-0.0%  | 0.0%-2.1%    | 1.5%-7.3%     | 0.0%-0.0%    | 3.9%-5.7%   |
| Pfubp1-Asn789Asp  | 0/112         | 0/95        | 13/346      | 0/5         | 0/83       | 0/92        | 1/133       | 1/125       | 1/179       | 0/14       | 2/204        | 3/136         | 0/4          | 21/1528     |
|                   | 0.0%          | 0.0%        | 3.8%        | 0.0%        | 0.0%       | 0.0%        | 0.8%        | 0.8%        | 0.6%        | 0.0%       | 1.0%         | 2.2%          | 0.0%         | 1.4%        |
|                   | 0.0%-0.0%     | 0.0%-0.0%   | 2.1%-5.4%   | 0.0%-0.0%   | 0.0%-0.0%  | 0.0%-0.0%   | 0.0%-2.0%   | 0.0%-2.1%   | 0.0%-1.5%   | 0.0%-0.0%  | 0.0%-2.1%    | 0.1%-4.3%     | 0.0%-0.0%    | 0.9%-1.9%   |

|                   |             |             |            |             |            |             |           |             |            |            |             |             |             |           |
|-------------------|-------------|-------------|------------|-------------|------------|-------------|-----------|-------------|------------|------------|-------------|-------------|-------------|-----------|
| Pfubp1-Asn798Asp  | 6/112       | 8/95        | 19/346     | 0/5         | 5/83       | 11/92       | 5/133     | 6/125       | 20/179     | 0/14       | 3/204       | 9/136       | 0/4         | 92/1528   |
|                   | 5.4%        | 8.4%        | 5.5%       | 0.0%        | 6.0%       | 12.0%       | 3.8%      | 4.8%        | 11.2%      | 0.0%       | 1.5%        | 6.6%        | 0.0%        | 6.0%      |
|                   | 1.9%-8.9%   | 3.7%-13.1%  | 3.5%-7.5%  | 0.0%-0.0%   | 1.7%-10.3% | 6.4%-17.5%  | 1.0%-6.5% | 1.7%-7.9%   | 7.3%-15.0% | 0.0%-0.0%  | 0.1%-2.9%   | 3.1%-10.1%  | 0.0%-0.0%   | 5.0%-7.0% |
| Pfubp1-Asn917Lys  | 0/15        | 0/65        | 0/219      | 0/2         | 0/79       | 1/54        | 2/103     | 0/20        | 0/98       | 1/21       | 2/76        | 0/17        | 0/4         | 6/773     |
|                   | 0.0%        | 0.0%        | 0.0%       | 0.0%        | 0.0%       | 1.9%        | 1.9%      | 0.0%        | 0.0%       | 4.8%       | 2.6%        | 0.0%        | 0.0%        | 0.8%      |
|                   | 0.0%-0.0%   | 0.0%-0.0%   | 0.0%-0.0%  | 0.0%-0.0%   | 0.0%-0.0%  | 0.0%-4.9%   | 0.0%-4.2% | 0.0%-0.0%   | 0.0%-0.0%  | 0.0%-12.4% | 0.0%-5.7%   | 0.0%-0.0%   | 0.0%-0.0%   | 0.3%-1.3% |
| Pfubp1-Asn920Asp  | 0/14        | 1/71        | 4/221      | 0/2         | 0/92       | 1/60        | 0/104     | 1/19        | 0/100      | 0/21       | 1/76        | 0/17        | 0/4         | 8/801     |
|                   | 0.0%        | 1.4%        | 1.8%       | 0.0%        | 0.0%       | 1.7%        | 0.0%      | 5.3%        | 0.0%       | 0.0%       | 1.3%        | 0.0%        | 0.0%        | 1.0%      |
|                   | 0.0%-0.0%   | 0.0%-3.7%   | 0.3%-3.3%  | 0.0%-0.0%   | 0.0%-0.0%  | 0.0%-4.4%   | 0.0%-0.0% | 0.0%-13.7%  | 0.0%-0.0%  | 0.0%-0.0%  | 0.0%-3.5%   | 0.0%-0.0%   | 0.0%-0.0%   | 0.4%-1.6% |
| Pfubp1-Asn943Asp  | no coverage | no coverage | 3/43       | no coverage | 0/1        | no coverage | 1/30      | no coverage | 0/16       | 0/2        | no coverage | no coverage | no coverage | 4/92      |
|                   | no coverage | no coverage | 7.0%       | no coverage | 0.0%       | no coverage | 3.3%      | no coverage | 0.0%       | 0.0%       | no coverage | no coverage | no coverage | 4.3%      |
|                   | no coverage | no coverage | 0.6%-13.4% | no coverage | 0.0%-0.0%  | no coverage | 0.0%-8.7% | no coverage | 0.0%-0.0%  | 0.0%-0.0%  | no coverage | no coverage | no coverage | 0.9%-7.8% |
| Pfubp1-Asn964Lys  | no coverage | 0/16        | 2/119      | no coverage | 0/28       | 0/5         | 1/73      | no coverage | 2/26       | 0/3        | 0/5         | 0/1         | no coverage | 5/276     |
|                   | no coverage | 0.0%        | 1.7%       | no coverage | 0.0%       | 0.0%        | 1.4%      | no coverage | 7.7%       | 0.0%       | 0.0%        | 0.0%        | no coverage | 1.8%      |
|                   | no coverage | 0.0%-0.0%   | 0.0%-3.6%  | no coverage | 0.0%-0.0%  | 0.0%-0.0%   | 0.0%-3.6% | no coverage | 0.0%-16.3% | 0.0%-0.0%  | 0.0%-0.0%   | 0.0%-0.0%   | no coverage | 0.5%-3.1% |
| Pfubp1-Asn965Lys  | no coverage | 0/16        | 2/119      | no coverage | 0/28       | 0/5         | 1/73      | no coverage | 2/26       | 0/3        | 0/5         | 0/1         | no coverage | 5/276     |
|                   | no coverage | 0.0%        | 1.7%       | no coverage | 0.0%       | 0.0%        | 1.4%      | no coverage | 7.7%       | 0.0%       | 0.0%        | 0.0%        | no coverage | 1.8%      |
|                   | no coverage | 0.0%-0.0%   | 0.0%-3.6%  | no coverage | 0.0%-0.0%  | 0.0%-0.0%   | 0.0%-3.6% | no coverage | 0.0%-16.3% | 0.0%-0.0%  | 0.0%-0.0%   | 0.0%-0.0%   | no coverage | 0.5%-3.1% |
| Pfubp1-Asn966Lys  | no coverage | 0/16        | 2/119      | no coverage | 0/28       | 0/5         | 1/73      | no coverage | 1/26       | 0/3        | 0/5         | 0/1         | no coverage | 4/276     |
|                   | no coverage | 0.0%        | 1.7%       | no coverage | 0.0%       | 0.0%        | 1.4%      | no coverage | 3.8%       | 0.0%       | 0.0%        | 0.0%        | no coverage | 1.4%      |
|                   | no coverage | 0.0%-0.0%   | 0.0%-3.6%  | no coverage | 0.0%-0.0%  | 0.0%-0.0%   | 0.0%-3.6% | no coverage | 0.0%-10.0% | 0.0%-0.0%  | 0.0%-0.0%   | 0.0%-0.0%   | no coverage | 0.3%-2.6% |
| Pfubp1-Asp146Tyr  | 0/192       | 0/194       | 1/560      | 0/18        | 0/181      | 0/207       | 0/229     | 1/185       | 0/294      | 0/41       | 1/352       | 0/211       | 0/40        | 3/2704    |
|                   | 0.0%        | 0.0%        | 0.2%       | 0.0%        | 0.0%       | 0.0%        | 0.0%      | 0.5%        | 0.0%       | 0.0%       | 0.3%        | 0.0%        | 0.0%        | 0.1%      |
|                   | 0.0%-0.0%   | 0.0%-0.0%   | 0.0%-0.5%  | 0.0%-0.0%   | 0.0%-0.0%  | 0.0%-0.0%   | 0.0%-0.0% | 0.0%-1.4%   | 0.0%-0.0%  | 0.0%-0.0%  | 0.0%-0.8%   | 0.0%-0.0%   | 0.0%-0.0%   | 0.0%-0.2% |
| Pfubp1-Asp158Asn  | 0/192       | 4/194       | 18/560     | 0/18        | 4/181      | 2/207       | 3/229     | 1/185       | 0/294      | 0/41       | 1/352       | 6/211       | 0/40        | 39/2704   |
|                   | 0.0%        | 2.1%        | 3.2%       | 0.0%        | 2.2%       | 1.0%        | 1.3%      | 0.5%        | 0.0%       | 0.0%       | 0.3%        | 2.8%        | 0.0%        | 1.4%      |
|                   | 0.0%-0.0%   | 0.4%-3.7%   | 2.0%-4.4%  | 0.0%-0.0%   | 0.4%-4.0%  | 0.0%-2.1%   | 0.1%-2.5% | 0.0%-1.4%   | 0.0%-0.0%  | 0.0%-0.0%  | 0.0%-0.8%   | 1.0%-4.7%   | 0.0%-0.0%   | 1.1%-1.8% |
| Pfubp1-Asp180Tyr  | 0/169       | 0/173       | 0/542      | 0/17        | 0/171      | 0/186       | 2/208     | 0/170       | 3/258      | 0/32       | 0/282       | 0/178       | 0/34        | 5/2420    |
|                   | 0.0%        | 0.0%        | 0.0%       | 0.0%        | 0.0%       | 0.0%        | 1.0%      | 0.0%        | 1.2%       | 0.0%       | 0.0%        | 0.0%        | 0.0%        | 0.2%      |
|                   | 0.0%-0.0%   | 0.0%-0.0%   | 0.0%-0.0%  | 0.0%-0.0%   | 0.0%-0.0%  | 0.0%-0.0%   | 0.0%-2.1% | 0.0%-0.0%   | 0.1%-2.3%  | 0.0%-0.0%  | 0.0%-0.0%   | 0.0%-0.0%   | 0.0%-0.0%   | 0.1%-0.4% |
| Pfubp1-Asp1878Glu | 1/251       | 0/278       | 26/629     | 1/39        | 2/234      | 1/291       | 12/350    | 7/302       | 3/343      | 3/63       | 4/395       | 10/407      | 0/68        | 70/3650   |
|                   | 0.4%        | 0.0%        | 4.1%       | 2.6%        | 0.9%       | 0.3%        | 3.4%      | 2.3%        | 0.9%       | 4.8%       | 1.0%        | 2.5%        | 0.0%        | 1.9%      |
|                   | 0.0%-1.1%   | 0.0%-0.0%   | 2.8%-5.4%  | 0.0%-6.7%   | 0.0%-1.8%  | 0.0%-0.9%   | 1.8%-5.0% | 0.9%-3.7%   | 0.0%-1.7%  | 0.3%-9.2%  | 0.2%-1.8%   | 1.2%-3.7%   | 0.0%-0.0%   | 1.5%-2.3% |
| Pfubp1-Asp1934His | 0/47        | 1/69        | 1/267      | 0/9         | 1/69       | 0/52        | 0/114     | 3/72        | 1/91       | 0/12       | 0/126       | 0/58        | 0/4         | 7/990     |
|                   | 0.0%        | 1.4%        | 0.4%       | 0.0%        | 1.4%       | 0.0%        | 0.0%      | 4.2%        | 1.1%       | 0.0%       | 0.0%        | 0.0%        | 0.0%        | 0.7%      |
|                   | 0.0%-0.0%   | 0.0%-3.8%   | 0.0%-1.0%  | 0.0%-0.0%   | 0.0%-3.8%  | 0.0%-0.0%   | 0.0%-0.0% | 0.3%-8.0%   | 0.0%-2.9%  | 0.0%-0.0%  | 0.0%-0.0%   | 0.0%-0.0%   | 0.0%-0.0%   | 0.3%-1.1% |
| Pfubp1-Asp267Glu  | 0/19        | 0/58        | 0/254      | 0/3         | 0/109      | 0/48        | 1/117     | 0/22        | 1/137      | 1/31       | 0/100       | 0/12        | 0/5         | 3/915     |
|                   | 0.0%        | 0.0%        | 0.0%       | 0.0%        | 0.0%       | 0.0%        | 0.9%      | 0.0%        | 0.7%       | 3.2%       | 0.0%        | 0.0%        | 0.0%        | 0.3%      |
|                   | 0.0%-0.0%   | 0.0%-0.0%   | 0.0%-0.0%  | 0.0%-0.0%   | 0.0%-0.0%  | 0.0%-0.0%   | 0.0%-2.3% | 0.0%-0.0%   | 0.0%-1.9%  | 0.0%-8.4%  | 0.0%-0.0%   | 0.0%-0.0%   | 0.0%-0.0%   | 0.0%-0.6% |
| Pfubp1-Asp2756Gly | 0/36        | 0/76        | 2/319      | 0/16        | 0/142      | 1/67        | 0/139     | 0/58        | 0/169      | 0/27       | 1/144       | 0/26        | 0/27        | 4/1246    |
|                   | 0.0%        | 0.0%        | 0.6%       | 0.0%        | 0.0%       | 1.5%        | 0.0%      | 0.0%        | 0.0%       | 0.0%       | 0.7%        | 0.0%        | 0.0%        | 0.3%      |
|                   | 0.0%-0.0%   | 0.0%-0.0%   | 0.0%-1.4%  | 0.0%-0.0%   | 0.0%-0.0%  | 0.0%-3.9%   | 0.0%-0.0% | 0.0%-0.0%   | 0.0%-0.0%  | 0.0%-0.0%  | 0.0%-1.8%   | 0.0%-0.0%   | 0.0%-0.0%   | 0.1%-0.6% |
| Pfubp1-Asp280Ala  | 0/19        | 14/58       | 50/254     | 2/3         | 23/109     | 6/48        | 15/117    | 0/22        | 13/137     | 1/31       | 3/100       | 2/12        | 2/5         | 131/915   |
|                   | 0.0%        | 24.1%       | 19.7%      | 66.7%       | 21.1%      | 12.5%       | 12.8%     | 0.0%        | 9.5%       | 3.2%       | 3.0%        | 16.7%       | 40.0%       | 14.3%     |

|                   |           |             |             |              |             |            |            |           |            |           |            |            |            |             |
|-------------------|-----------|-------------|-------------|--------------|-------------|------------|------------|-----------|------------|-----------|------------|------------|------------|-------------|
|                   | 0.0%-0.0% | 14.9%-33.4% | 15.6%-23.8% | 21.9%-100.0% | 14.7%-27.5% | 4.6%-20.4% | 7.7%-17.9% | 0.0%-0.0% | 5.4%-13.6% | 0.0%-8.4% | 0.2%-5.8%  | 0.0%-34.4% | 4.0%-76.0% | 12.4%-16.2% |
| Pfpup1-Asp2876Ala | 0/3       | 0/55        | 5/252       | 0/1          | 0/106       | 0/51       | 0/113      | 0/21      | 1/122      | 0/23      | 0/90       | 0/15       | 0/2        | 6/854       |
|                   | 0.0%      | 0.0%        | 2.0%        | 0.0%         | 0.0%        | 0.0%       | 0.0%       | 0.0%      | 0.8%       | 0.0%      | 0.0%       | 0.0%       | 0.0%       | 0.7%        |
|                   | 0.0%-0.0% | 0.0%-0.0%   | 0.5%-3.4%   | 0.0%-0.0%    | 0.0%-0.0%   | 0.0%-0.0%  | 0.0%-0.0%  | 0.0%-0.0% | 0.0%-2.2%  | 0.0%-0.0% | 0.0%-0.0%  | 0.0%-0.0%  | 0.0%-0.0%  | 0.2%-1.2%   |
| Pfpup1-Asp287Asn  | 0/19      | 1/58        | 5/254       | 0/3          | 2/109       | 0/48       | 0/118      | 0/22      | 5/137      | 1/31      | 2/101      | 0/12       | 0/5        | 16/917      |
|                   | 0.0%      | 1.7%        | 2.0%        | 0.0%         | 1.8%        | 0.0%       | 0.0%       | 0.0%      | 3.6%       | 3.2%      | 2.0%       | 0.0%       | 0.0%       | 1.7%        |
|                   | 0.0%-0.0% | 0.0%-4.5%   | 0.5%-3.4%   | 0.0%-0.0%    | 0.0%-3.9%   | 0.0%-0.0%  | 0.0%-0.0%  | 0.0%-0.0% | 1.0%-6.3%  | 0.0%-8.4% | 0.0%-4.3%  | 0.0%-0.0%  | 0.0%-0.0%  | 1.0%-2.5%   |
| Pfpup1-Asp2947Tyr | 0/170     | 0/165       | 1/575       | 0/24         | 0/189       | 0/176      | 0/224      | 0/188     | 0/299      | 0/52      | 0/327      | 0/162      | 2/44       | 3/2595      |
|                   | 0.0%      | 0.0%        | 0.2%        | 0.0%         | 0.0%        | 0.0%       | 0.0%       | 0.0%      | 0.0%       | 0.0%      | 0.0%       | 0.0%       | 4.5%       | 0.1%        |
|                   | 0.0%-0.0% | 0.0%-0.0%   | 0.0%-0.5%   | 0.0%-0.0%    | 0.0%-0.0%   | 0.0%-0.0%  | 0.0%-0.0%  | 0.0%-0.0% | 0.0%-0.0%  | 0.0%-0.0% | 0.0%-0.0%  | 0.0%-0.0%  | 0.0%-9.7%  | 0.0%-0.2%   |
| Pfpup1-Asp3136Asn | 0/126     | 0/164       | 2/530       | 0/12         | 0/171       | 0/159      | 0/188      | 0/144     | 1/277      | 0/33      | 0/267      | 0/173      | 0/25       | 3/2269      |
|                   | 0.0%      | 0.0%        | 0.4%        | 0.0%         | 0.0%        | 0.0%       | 0.0%       | 0.0%      | 0.4%       | 0.0%      | 0.0%       | 0.0%       | 0.0%       | 0.1%        |
|                   | 0.0%-0.0% | 0.0%-0.0%   | 0.0%-0.8%   | 0.0%-0.0%    | 0.0%-0.0%   | 0.0%-0.0%  | 0.0%-0.0%  | 0.0%-0.0% | 0.0%-1.0%  | 0.0%-0.0% | 0.0%-0.0%  | 0.0%-0.0%  | 0.0%-0.0%  | 0.0%-0.3%   |
| Pfpup1-Asp360Asn  | 0/5       | 0/14        | 3/116       | no coverage  | 1/10        | 0/11       | 2/49       | 0/9       | 1/59       | 0/4       | 3/40       | 0/8        | 0/1        | 10/326      |
|                   | 0.0%      | 0.0%        | 2.6%        | no coverage  | 10.0%       | 0.0%       | 4.1%       | 0.0%      | 1.7%       | 0.0%      | 7.5%       | 0.0%       | 0.0%       | 3.1%        |
|                   | 0.0%-0.0% | 0.0%-0.0%   | 0.2%-5.0%   | no coverage  | 0.0%-25.6%  | 0.0%-0.0%  | 0.0%-8.7%  | 0.0%-0.0% | 0.0%-4.5%  | 0.0%-0.0% | 0.6%-14.4% | 0.0%-0.0%  | 0.0%-0.0%  | 1.5%-4.6%   |
| Pfpup1-Asp734Val  | 0/180     | 0/197       | 0/566       | 0/27         | 0/202       | 0/190      | 0/252      | 1/216     | 2/301      | 0/55      | 0/348      | 0/248      | 0/44       | 3/2826      |
|                   | 0.0%      | 0.0%        | 0.0%        | 0.0%         | 0.0%        | 0.0%       | 0.0%       | 0.5%      | 0.7%       | 0.0%      | 0.0%       | 0.0%       | 0.0%       | 0.1%        |
|                   | 0.0%-0.0% | 0.0%-0.0%   | 0.0%-0.0%   | 0.0%-0.0%    | 0.0%-0.0%   | 0.0%-0.0%  | 0.0%-0.0%  | 0.0%-1.2% | 0.0%-1.4%  | 0.0%-0.0% | 0.0%-0.0%  | 0.0%-0.0%  | 0.0%-0.0%  | 0.0%-0.2%   |
| Pfpup1-Asp777Gly  | 6/112     | 8/95        | 7/346       | 0/5          | 5/83        | 11/92      | 4/133      | 5/125     | 19/179     | 0/14      | 3/204      | 6/136      | 0/4        | 74/1528     |
|                   | 5.4%      | 8.4%        | 2.0%        | 0.0%         | 6.0%        | 12.0%      | 3.0%       | 4.0%      | 10.6%      | 0.0%      | 1.5%       | 4.4%       | 0.0%       | 4.8%        |
|                   | 1.9%-8.9% | 3.7%-13.1%  | 0.8%-3.3%   | 0.0%-0.0%    | 1.7%-10.3%  | 6.4%-17.5% | 0.6%-5.4%  | 1.1%-6.9% | 6.8%-14.4% | 0.0%-0.0% | 0.1%-2.9%  | 1.5%-7.3%  | 0.0%-0.0%  | 3.9%-5.7%   |
| Pfpup1-Asp782Gly  | 6/112     | 8/95        | 7/346       | 0/5          | 5/83        | 11/92      | 4/133      | 5/125     | 19/179     | 0/14      | 2/204      | 6/136      | 0/4        | 73/1528     |
|                   | 5.4%      | 8.4%        | 2.0%        | 0.0%         | 6.0%        | 12.0%      | 3.0%       | 4.0%      | 10.6%      | 0.0%      | 1.0%       | 4.4%       | 0.0%       | 4.8%        |
|                   | 1.9%-8.9% | 3.7%-13.1%  | 0.8%-3.3%   | 0.0%-0.0%    | 1.7%-10.3%  | 6.4%-17.5% | 0.6%-5.4%  | 1.1%-6.9% | 6.8%-14.4% | 0.0%-0.0% | 0.0%-2.1%  | 1.5%-7.3%  | 0.0%-0.0%  | 3.9%-5.7%   |
| Pfpup1-Asp786Gly  | 6/112     | 8/95        | 7/346       | 0/5          | 5/83        | 11/92      | 4/133      | 5/125     | 19/179     | 0/14      | 2/204      | 6/136      | 0/4        | 73/1528     |
|                   | 5.4%      | 8.4%        | 2.0%        | 0.0%         | 6.0%        | 12.0%      | 3.0%       | 4.0%      | 10.6%      | 0.0%      | 1.0%       | 4.4%       | 0.0%       | 4.8%        |
|                   | 1.9%-8.9% | 3.7%-13.1%  | 0.8%-3.3%   | 0.0%-0.0%    | 1.7%-10.3%  | 6.4%-17.5% | 0.6%-5.4%  | 1.1%-6.9% | 6.8%-14.4% | 0.0%-0.0% | 0.0%-2.1%  | 1.5%-7.3%  | 0.0%-0.0%  | 3.9%-5.7%   |
| Pfpup1-Asp790Lys  | 6/112     | 8/95        | 7/346       | 0/5          | 5/83        | 11/92      | 4/133      | 5/125     | 19/179     | 0/14      | 2/204      | 6/136      | 0/4        | 73/1528     |
|                   | 5.4%      | 8.4%        | 2.0%        | 0.0%         | 6.0%        | 12.0%      | 3.0%       | 4.0%      | 10.6%      | 0.0%      | 1.0%       | 4.4%       | 0.0%       | 4.8%        |
|                   | 1.9%-8.9% | 3.7%-13.1%  | 0.8%-3.3%   | 0.0%-0.0%    | 1.7%-10.3%  | 6.4%-17.5% | 0.6%-5.4%  | 1.1%-6.9% | 6.8%-14.4% | 0.0%-0.0% | 0.0%-2.1%  | 1.5%-7.3%  | 0.0%-0.0%  | 3.9%-5.7%   |
| Pfpup1-Asp791Asn  | 0/112     | 0/95        | 12/346      | 0/5          | 0/83        | 0/92       | 0/133      | 0/125     | 1/179      | 0/14      | 1/204      | 3/136      | 0/4        | 17/1528     |
|                   | 0.0%      | 0.0%        | 3.5%        | 0.0%         | 0.0%        | 0.0%       | 0.0%       | 0.0%      | 0.6%       | 0.0%      | 0.5%       | 2.2%       | 0.0%       | 1.1%        |
|                   | 0.0%-0.0% | 0.0%-0.0%   | 1.9%-5.1%   | 0.0%-0.0%    | 0.0%-0.0%   | 0.0%-0.0%  | 0.0%-0.0%  | 0.0%-0.0% | 0.0%-1.5%  | 0.0%-0.0% | 0.0%-1.3%  | 0.1%-4.3%  | 0.0%-0.0%  | 0.7%-1.6%   |
| Pfpup1-Asp796Asn  | 6/112     | 8/95        | 7/346       | 0/5          | 5/83        | 11/92      | 4/133      | 5/125     | 15/179     | 0/14      | 2/204      | 6/136      | 0/4        | 69/1528     |
|                   | 5.4%      | 8.4%        | 2.0%        | 0.0%         | 6.0%        | 12.0%      | 3.0%       | 4.0%      | 8.4%       | 0.0%      | 1.0%       | 4.4%       | 0.0%       | 4.5%        |
|                   | 1.9%-8.9% | 3.7%-13.1%  | 0.8%-3.3%   | 0.0%-0.0%    | 1.7%-10.3%  | 6.4%-17.5% | 0.6%-5.4%  | 1.1%-6.9% | 5.0%-11.8% | 0.0%-0.0% | 0.0%-2.1%  | 1.5%-7.3%  | 0.0%-0.0%  | 3.6%-5.4%   |
| Pfpup1-Asp800Asn  | 0/112     | 0/95        | 12/346      | 0/5          | 0/83        | 0/92       | 1/133      | 0/125     | 5/179      | 0/14      | 1/204      | 3/136      | 0/4        | 22/1528     |
|                   | 0.0%      | 0.0%        | 3.5%        | 0.0%         | 0.0%        | 0.0%       | 0.8%       | 0.0%      | 2.8%       | 0.0%      | 0.5%       | 2.2%       | 0.0%       | 1.4%        |
|                   | 0.0%-0.0% | 0.0%-0.0%   | 1.9%-5.1%   | 0.0%-0.0%    | 0.0%-0.0%   | 0.0%-0.0%  | 0.0%-2.0%  | 0.0%-0.0% | 0.8%-4.8%  | 0.0%-0.0% | 0.0%-1.3%  | 0.1%-4.3%  | 0.0%-0.0%  | 0.9%-1.9%   |
| Pfpup1-Cys2818Gly | 4/167     | 0/165       | 18/558      | 1/19         | 5/179       | 3/183      | 12/215     | 4/169     | 0/271      | 2/49      | 8/285      | 4/181      | 1/38       | 62/2479     |
|                   | 2.4%      | 0.0%        | 3.2%        | 5.3%         | 2.8%        | 1.6%       | 5.6%       | 2.4%      | 0.0%       | 4.1%      | 2.8%       | 2.2%       | 2.6%       | 2.5%        |
|                   | 0.4%-4.3% | 0.0%-0.0%   | 2.0%-4.5%   | 0.0%-13.7%   | 0.8%-4.8%   | 0.1%-3.2%  | 3.0%-8.2%  | 0.4%-4.3% | 0.0%-0.0%  | 0.0%-8.7% | 1.2%-4.4%  | 0.4%-4.0%  | 0.0%-6.9%  | 2.0%-3.0%   |
| Pfpup1-Cys2818Tyr | 1/167     | 3/165       | 23/558      | 2/19         | 7/179       | 8/183      | 5/215      | 6/169     | 18/271     | 0/49      | 17/285     | 5/181      | 6/38       | 101/2479    |

|                   |             |             |             |               |              |             |             |              |             |              |             |              |              |             |
|-------------------|-------------|-------------|-------------|---------------|--------------|-------------|-------------|--------------|-------------|--------------|-------------|--------------|--------------|-------------|
|                   | 0.6%        | 1.8%        | 4.1%        | 10.5%         | 3.9%         | 4.4%        | 2.3%        | 3.6%         | 6.6%        | 0.0%         | 6.0%        | 2.8%         | 15.8%        | 4.1%        |
|                   | 0.0%-1.6%   | 0.1%-3.5%   | 2.7%-5.5%   | 0.0%-22.1%    | 1.5%-6.3%    | 1.9%-6.9%   | 0.6%-4.0%   | 1.2%-5.9%    | 4.2%-9.1%   | 0.0%-0.0%    | 3.7%-8.3%   | 0.8%-4.8%    | 6.1%-25.5%   | 3.4%-4.7%   |
| Pfubp1-Gln1330Leu | 0/60        | 0/76        | 7/362       | 0/8           | 0/128        | 0/65        | 3/130       | 0/85         | 2/155       | 0/27         | 0/172       | 0/43         | 0/12         | 12/1323     |
|                   | 0.0%        | 0.0%        | 1.9%        | 0.0%          | 0.0%         | 0.0%        | 2.3%        | 0.0%         | 1.3%        | 0.0%         | 0.0%        | 0.0%         | 0.0%         | 0.9%        |
|                   | 0.0%-0.0%   | 0.0%-0.0%   | 0.7%-3.1%   | 0.0%-0.0%     | 0.0%-0.0%    | 0.0%-0.0%   | 0.1%-4.5%   | 0.0%-0.0%    | 0.0%-2.8%   | 0.0%-0.0%    | 0.0%-0.0%   | 0.0%-0.0%    | 0.0%-0.0%    | 0.5%-1.3%   |
| Pfubp1-Gln1885Pro | 0/243       | 0/273       | 0/622       | 0/34          | 0/227        | 1/277       | 1/337       | 0/291        | 0/330       | 2/59         | 0/390       | 1/388        | 0/63         | 5/3534      |
|                   | 0.0%        | 0.0%        | 0.0%        | 0.0%          | 0.0%         | 0.4%        | 0.3%        | 0.0%         | 0.0%        | 3.4%         | 0.0%        | 0.3%         | 0.0%         | 0.1%        |
|                   | 0.0%-0.0%   | 0.0%-0.0%   | 0.0%-0.0%   | 0.0%-0.0%     | 0.0%-0.0%    | 0.0%-1.0%   | 0.0%-0.8%   | 0.0%-0.0%    | 0.0%-0.0%   | 0.0%-7.3%    | 0.0%-0.0%   | 0.0%-0.7%    | 0.0%-0.0%    | 0.0%-0.2%   |
| Pfubp1-Gln2914Arg | 0/123       | 6/140       | 1/521       | 0/23          | 0/172        | 0/148       | 0/201       | 0/156        | 1/255       | 0/48         | 0/273       | 0/122        | 0/38         | 8/2220      |
|                   | 0.0%        | 4.3%        | 0.2%        | 0.0%          | 0.0%         | 0.0%        | 0.0%        | 0.0%         | 0.4%        | 0.0%         | 0.0%        | 0.0%         | 0.0%         | 0.4%        |
|                   | 0.0%-0.0%   | 1.5%-7.1%   | 0.0%-0.5%   | 0.0%-0.0%     | 0.0%-0.0%    | 0.0%-0.0%   | 0.0%-0.0%   | 0.0%-0.0%    | 0.0%-1.0%   | 0.0%-0.0%    | 0.0%-0.0%   | 0.0%-0.0%    | 0.0%-0.0%    | 0.2%-0.6%   |
| Pfubp1-Gln740Arg  | 3/180       | 0/197       | 1/566       | 0/27          | 3/202        | 0/190       | 7/252       | 0/216        | 0/301       | 1/55         | 6/348       | 1/248        | 0/44         | 22/2826     |
|                   | 1.7%        | 0.0%        | 0.2%        | 0.0%          | 1.5%         | 0.0%        | 2.8%        | 0.0%         | 0.0%        | 1.8%         | 1.7%        | 0.4%         | 0.0%         | 0.8%        |
|                   | 0.1%-3.2%   | 0.0%-0.0%   | 0.0%-0.5%   | 0.0%-0.0%     | 0.1%-2.9%    | 0.0%-0.0%   | 1.1%-4.5%   | 0.0%-0.0%    | 0.0%-0.0%   | 0.0%-4.8%    | 0.6%-2.9%   | 0.0%-1.1%    | 0.0%-0.0%    | 0.5%-1.1%   |
| Pfubp1-Gln740Lys  | 0/180       | 0/197       | 1/566       | 0/27          | 0/202        | 0/190       | 2/252       | 1/216        | 0/301       | 0/55         | 0/348       | 0/248        | 0/44         | 4/2826      |
|                   | 0.0%        | 0.0%        | 0.2%        | 0.0%          | 0.0%         | 0.0%        | 0.8%        | 0.5%         | 0.0%        | 0.0%         | 0.0%        | 0.0%         | 0.0%         | 0.1%        |
|                   | 0.0%-0.0%   | 0.0%-0.0%   | 0.0%-0.5%   | 0.0%-0.0%     | 0.0%-0.0%    | 0.0%-0.0%   | 0.0%-1.7%   | 0.0%-1.2%    | 0.0%-0.0%   | 0.0%-0.0%    | 0.0%-0.0%   | 0.0%-0.0%    | 0.0%-0.0%    | 0.0%-0.3%   |
| Pfubp1-Glu1011Lys | 0/8         | 0/66        | 5/259       | 0/2           | 0/123        | 0/54        | 2/118       | 0/39         | 1/138       | 0/19         | 2/106       | 1/16         | 0/12         | 11/960      |
|                   | 0.0%        | 0.0%        | 1.9%        | 0.0%          | 0.0%         | 0.0%        | 1.7%        | 0.0%         | 0.7%        | 0.0%         | 1.9%        | 6.2%         | 0.0%         | 1.1%        |
|                   | 0.0%-0.0%   | 0.0%-0.0%   | 0.5%-3.3%   | 0.0%-0.0%     | 0.0%-0.0%    | 0.0%-0.0%   | 0.0%-3.6%   | 0.0%-0.0%    | 0.0%-1.9%   | 0.0%-0.0%    | 0.0%-4.1%   | 0.0%-16.2%   | 0.0%-0.0%    | 0.6%-1.7%   |
| Pfubp1-Glu1085Lys | 0/30        | 0/72        | 3/311       | 0/4           | 0/128        | 0/57        | 0/127       | 0/76         | 0/137       | 0/22         | 0/117       | 0/22         | 0/13         | 3/1116      |
|                   | 0.0%        | 0.0%        | 1.0%        | 0.0%          | 0.0%         | 0.0%        | 0.0%        | 0.0%         | 0.0%        | 0.0%         | 0.0%        | 0.0%         | 0.0%         | 0.3%        |
|                   | 0.0%-0.0%   | 0.0%-0.0%   | 0.1%-1.9%   | 0.0%-0.0%     | 0.0%-0.0%    | 0.0%-0.0%   | 0.0%-0.0%   | 0.0%-0.0%    | 0.0%-0.0%   | 0.0%-0.0%    | 0.0%-0.0%   | 0.0%-0.0%    | 0.0%-0.0%    | 0.0%-0.5%   |
| Pfubp1-Glu111Asp  | 2/95        | 0/102       | 2/481       | 0/1           | 1/116        | 0/106       | 0/135       | 0/101        | 1/243       | 0/28         | 0/284       | 0/66         | 0/3          | 6/1761      |
|                   | 2.1%        | 0.0%        | 0.4%        | 0.0%          | 0.9%         | 0.0%        | 0.0%        | 0.0%         | 0.4%        | 0.0%         | 0.0%        | 0.0%         | 0.0%         | 0.3%        |
|                   | 0.0%-4.5%   | 0.0%-0.0%   | 0.0%-0.9%   | 0.0%-0.0%     | 0.0%-2.3%    | 0.0%-0.0%   | 0.0%-0.0%   | 0.0%-0.0%    | 0.0%-1.1%   | 0.0%-0.0%    | 0.0%-0.0%   | 0.0%-0.0%    | 0.0%-0.0%    | 0.1%-0.6%   |
| Pfubp1-Glu1613Asp | 0/3         | 1/65        | 1/222       | 0/1           | 0/111        | 1/51        | 0/115       | 0/29         | 0/80        | 0/10         | 0/61        | 0/18         | 0/9          | 3/775       |
|                   | 0.0%        | 1.5%        | 0.5%        | 0.0%          | 0.0%         | 2.0%        | 0.0%        | 0.0%         | 0.0%        | 0.0%         | 0.0%        | 0.0%         | 0.0%         | 0.4%        |
|                   | 0.0%-0.0%   | 0.0%-4.0%   | 0.0%-1.2%   | 0.0%-0.0%     | 0.0%-0.0%    | 0.0%-5.2%   | 0.0%-0.0%   | 0.0%-0.0%    | 0.0%-0.0%   | 0.0%-0.0%    | 0.0%-0.0%   | 0.0%-0.0%    | 0.0%-0.0%    | 0.0%-0.8%   |
| Pfubp1-Glu1877Lys | 0/251       | 0/278       | 0/629       | 0/39          | 0/234        | 0/291       | 0/350       | 3/302        | 0/343       | 1/63         | 2/395       | 0/407        | 0/68         | 6/3650      |
|                   | 0.0%        | 0.0%        | 0.0%        | 0.0%          | 0.0%         | 0.0%        | 0.0%        | 1.0%         | 0.0%        | 1.6%         | 0.5%        | 0.0%         | 0.0%         | 0.2%        |
|                   | 0.0%-0.0%   | 0.0%-0.0%   | 0.0%-0.0%   | 0.0%-0.0%     | 0.0%-0.0%    | 0.0%-0.0%   | 0.0%-0.0%   | 0.1%-1.9%    | 0.0%-0.0%   | 0.0%-4.2%    | 0.0%-1.1%   | 0.0%-0.0%    | 0.0%-0.0%    | 0.1%-0.3%   |
| Pfubp1-Glu1915Lys | 173/176     | 187/194     | 527/533     | 19/19         | 186/187      | 195/200     | 219/227     | 184/186      | 262/268     | 36/38        | 292/296     | 220/222      | 33/33        | 2533/2579   |
|                   | 98.3%       | 96.4%       | 98.9%       | 100.0%        | 99.5%        | 97.5%       | 96.5%       | 98.9%        | 97.8%       | 94.7%        | 98.6%       | 99.1%        | 100.0%       | 98.2%       |
|                   | 96.7%-99.9% | 94.2%-98.6% | 98.1%-99.6% | 100.0%-100.0% | 98.6%-100.0% | 95.7%-99.3% | 94.5%-98.5% | 97.7%-100.0% | 96.3%-99.2% | 88.8%-100.0% | 97.5%-99.8% | 98.1%-100.0% | 00.0%-100.0% | 97.8%-98.6% |
| Pfubp1-Glu1922Lys | 53/171      | 39/182      | 205/520     | 11/18         | 62/180       | 44/185      | 79/211      | 36/181       | 85/256      | 6/33         | 99/287      | 64/199       | 4/32         | 787/2455    |
|                   | 31.0%       | 21.4%       | 39.4%       | 61.1%         | 34.4%        | 23.8%       | 37.4%       | 19.9%        | 33.2%       | 18.2%        | 34.5%       | 32.2%        | 12.5%        | 32.1%       |
|                   | 25.2%-36.8% | 16.4%-26.4% | 35.9%-42.9% | 42.2%-80.0%   | 28.6%-40.3%  | 18.6%-28.9% | 32.0%-42.9% | 15.0%-24.8%  | 28.4%-38.0% | 7.1%-29.2%   | 29.9%-39.1% | 26.7%-37.6%  | 2.9%-22.1%   | 30.5%-33.6% |
| Pfubp1-Glu1929Lys | 3/47        | 8/69        | 27/265      | 1/9           | 2/69         | 2/52        | 11/114      | 7/72         | 17/91       | 1/12         | 16/126      | 2/58         | 1/4          | 98/988      |
|                   | 6.4%        | 11.6%       | 10.2%       | 11.1%         | 2.9%         | 3.8%        | 9.6%        | 9.7%         | 18.7%       | 8.3%         | 12.7%       | 3.4%         | 25.0%        | 9.9%        |
|                   | 0.5%-12.2%  | 5.3%-17.9%  | 7.1%-13.2%  | 0.0%-28.3%    | 0.0%-6.2%    | 0.0%-8.2%   | 5.1%-14.2%  | 4.0%-15.5%   | 12.0%-25.4% | 0.0%-21.5%   | 7.8%-17.6%  | 0.0%-7.4%    | 0.0%-60.6%   | 8.4%-11.5%  |
| Pfubp1-Glu277Gln  | 0/19        | 0/58        | 0/254       | 0/3           | 0/109        | 0/48        | 4/117       | 0/22         | 3/137       | 0/31         | 0/100       | 0/12         | 0/5          | 7/915       |
|                   | 0.0%        | 0.0%        | 0.0%        | 0.0%          | 0.0%         | 0.0%        | 3.4%        | 0.0%         | 2.2%        | 0.0%         | 0.0%        | 0.0%         | 0.0%         | 0.8%        |
|                   | 0.0%-0.0%   | 0.0%-0.0%   | 0.0%-0.0%   | 0.0%-0.0%     | 0.0%-0.0%    | 0.0%-0.0%   | 0.7%-6.2%   | 0.0%-0.0%    | 0.1%-4.2%   | 0.0%-0.0%    | 0.0%-0.0%   | 0.0%-0.0%    | 0.0%-0.0%    | 0.3%-1.2%   |



|                    |           |           |           |           |           |           |           |           |           |           |           |           |            |           |
|--------------------|-----------|-----------|-----------|-----------|-----------|-----------|-----------|-----------|-----------|-----------|-----------|-----------|------------|-----------|
| Pfulbp1-Glu2860Val | 0/169     | 0/168     | 1/571     | 0/19      | 0/187     | 1/191     | 2/223     | 0/169     | 1/288     | 0/50      | 2/304     | 0/186     | 0/40       | 7/2565    |
|                    | 0.0%      | 0.0%      | 0.2%      | 0.0%      | 0.0%      | 0.5%      | 0.9%      | 0.0%      | 0.3%      | 0.0%      | 0.7%      | 0.0%      | 0.0%       | 0.3%      |
|                    | 0.0%-0.0% | 0.0%-0.0% | 0.0%-0.5% | 0.0%-0.0% | 0.0%-0.0% | 0.0%-1.4% | 0.0%-1.9% | 0.0%-0.0% | 0.0%-0.9% | 0.0%-0.0% | 0.0%-1.4% | 0.0%-0.0% | 0.0%-0.0%  | 0.1%-0.4% |
| Pfulbp1-Glu317Val  | 1/100     | 2/137     | 18/475    | 0/13      | 4/161     | 0/141     | 3/170     | 2/123     | 1/226     | 1/42      | 7/251     | 0/99      | 0/20       | 39/1958   |
|                    | 1.0%      | 1.5%      | 3.8%      | 0.0%      | 2.5%      | 0.0%      | 1.8%      | 1.6%      | 0.4%      | 2.4%      | 2.8%      | 0.0%      | 0.0%       | 2.0%      |
|                    | 0.0%-2.6% | 0.0%-3.1% | 2.3%-5.2% | 0.0%-0.0% | 0.5%-4.5% | 0.0%-0.0% | 0.1%-3.4% | 0.0%-3.5% | 0.0%-1.2% | 0.0%-6.3% | 1.1%-4.5% | 0.0%-0.0% | 0.0%-0.0%  | 1.5%-2.5% |
| Pfulbp1-Glu737Val  | 0/180     | 1/197     | 0/566     | 0/27      | 1/202     | 0/190     | 0/252     | 0/216     | 0/301     | 0/55      | 2/348     | 1/248     | 0/44       | 5/2826    |
|                    | 0.0%      | 0.5%      | 0.0%      | 0.0%      | 0.5%      | 0.0%      | 0.0%      | 0.0%      | 0.0%      | 0.0%      | 0.6%      | 0.4%      | 0.0%       | 0.2%      |
|                    | 0.0%-0.0% | 0.0%-1.3% | 0.0%-0.0% | 0.0%-0.0% | 0.0%-1.3% | 0.0%-0.0% | 0.0%-0.0% | 0.0%-0.0% | 0.0%-0.0% | 0.0%-0.0% | 0.0%-1.2% | 0.0%-1.1% | 0.0%-0.0%  | 0.0%-0.3% |
| Pfulbp1-Glu805Lys  | 0/187     | 0/177     | 0/503     | 0/15      | 0/145     | 0/189     | 3/209     | 0/215     | 0/247     | 0/30      | 0/300     | 0/269     | 0/18       | 3/2504    |
|                    | 0.0%      | 0.0%      | 0.0%      | 0.0%      | 0.0%      | 0.0%      | 1.4%      | 0.0%      | 0.0%      | 0.0%      | 0.0%      | 0.0%      | 0.0%       | 0.1%      |
|                    | 0.0%-0.0% | 0.0%-0.0% | 0.0%-0.0% | 0.0%-0.0% | 0.0%-0.0% | 0.0%-0.0% | 0.1%-2.8% | 0.0%-0.0% | 0.0%-0.0% | 0.0%-0.0% | 0.0%-0.0% | 0.0%-0.0% | 0.0%-0.0%  | 0.0%-0.2% |
| Pfulbp1-Gly1009Ala | 0/8       | 0/66      | 0/259     | 0/2       | 0/123     | 0/54      | 5/118     | 0/39      | 0/138     | 0/19      | 0/106     | 0/16      | 0/12       | 5/960     |
|                    | 0.0%      | 0.0%      | 0.0%      | 0.0%      | 0.0%      | 0.0%      | 4.2%      | 0.0%      | 0.0%      | 0.0%      | 0.0%      | 0.0%      | 0.0%       | 0.5%      |
|                    | 0.0%-0.0% | 0.0%-0.0% | 0.0%-0.0% | 0.0%-0.0% | 0.0%-0.0% | 0.0%-0.0% | 1.2%-7.3% | 0.0%-0.0% | 0.0%-0.0% | 0.0%-0.0% | 0.0%-0.0% | 0.0%-0.0% | 0.0%-0.0%  | 0.1%-0.9% |
| Pfulbp1-Gly1697Asp | 0/103     | 0/110     | 0/455     | 0/5       | 1/139     | 0/113     | 2/149     | 0/104     | 0/204     | 0/29      | 0/239     | 0/97      | 0/15       | 3/1762    |
|                    | 0.0%      | 0.0%      | 0.0%      | 0.0%      | 0.7%      | 0.0%      | 1.3%      | 0.0%      | 0.0%      | 0.0%      | 0.0%      | 0.0%      | 0.0%       | 0.2%      |
|                    | 0.0%-0.0% | 0.0%-0.0% | 0.0%-0.0% | 0.0%-0.0% | 0.0%-1.9% | 0.0%-0.0% | 0.0%-2.9% | 0.0%-0.0% | 0.0%-0.0% | 0.0%-0.0% | 0.0%-0.0% | 0.0%-0.0% | 0.0%-0.0%  | 0.0%-0.3% |
| Pfulbp1-Gly170Ala  | 5/192     | 4/194     | 11/561    | 0/18      | 2/182     | 1/207     | 2/229     | 3/185     | 5/295     | 0/41      | 2/352     | 1/211     | 0/40       | 36/2707   |
|                    | 2.6%      | 2.1%      | 2.0%      | 0.0%      | 1.1%      | 0.5%      | 0.9%      | 1.6%      | 1.7%      | 0.0%      | 0.6%      | 0.5%      | 0.0%       | 1.3%      |
|                    | 0.7%-4.5% | 0.4%-3.7% | 1.0%-2.9% | 0.0%-0.0% | 0.0%-2.4% | 0.0%-1.3% | 0.0%-1.9% | 0.1%-3.1% | 0.5%-2.9% | 0.0%-0.0% | 0.0%-1.2% | 0.0%-1.3% | 0.0%-0.0%  | 1.0%-1.7% |
| Pfulbp1-Gly1900Arg | 2/243     | 1/273     | 0/622     | 0/34      | 0/227     | 0/277     | 1/336     | 0/291     | 0/330     | 0/59      | 0/390     | 2/388     | 0/63       | 6/3533    |
|                    | 0.8%      | 0.4%      | 0.0%      | 0.0%      | 0.0%      | 0.0%      | 0.3%      | 0.0%      | 0.0%      | 0.0%      | 0.0%      | 0.5%      | 0.0%       | 0.2%      |
|                    | 0.0%-1.8% | 0.0%-1.0% | 0.0%-0.0% | 0.0%-0.0% | 0.0%-0.0% | 0.0%-0.0% | 0.0%-0.8% | 0.0%-0.0% | 0.0%-0.0% | 0.0%-0.0% | 0.0%-0.0% | 0.0%-1.1% | 0.0%-0.0%  | 0.1%-0.3% |
| Pfulbp1-Gly2010Asp | 0/118     | 0/133     | 0/521     | 0/16      | 0/166     | 0/144     | 0/182     | 0/126     | 3/269     | 0/45      | 0/289     | 0/96      | 0/33       | 3/2138    |
|                    | 0.0%      | 0.0%      | 0.0%      | 0.0%      | 0.0%      | 0.0%      | 0.0%      | 0.0%      | 1.1%      | 0.0%      | 0.0%      | 0.0%      | 0.0%       | 0.1%      |
|                    | 0.0%-0.0% | 0.0%-0.0% | 0.0%-0.0% | 0.0%-0.0% | 0.0%-0.0% | 0.0%-0.0% | 0.0%-0.0% | 0.0%-0.0% | 0.1%-2.2% | 0.0%-0.0% | 0.0%-0.0% | 0.0%-0.0% | 0.0%-0.0%  | 0.0%-0.3% |
| Pfulbp1-Gly2806Cys | 0/65      | 0/93      | 0/395     | 0/15      | 0/155     | 0/84      | 0/167     | 0/90      | 3/199     | 0/36      | 0/203     | 0/46      | 0/31       | 3/1579    |
|                    | 0.0%      | 0.0%      | 0.0%      | 0.0%      | 0.0%      | 0.0%      | 0.0%      | 0.0%      | 1.5%      | 0.0%      | 0.0%      | 0.0%      | 0.0%       | 0.2%      |
|                    | 0.0%-0.0% | 0.0%-0.0% | 0.0%-0.0% | 0.0%-0.0% | 0.0%-0.0% | 0.0%-0.0% | 0.0%-0.0% | 0.0%-0.0% | 0.1%-2.9% | 0.0%-0.0% | 0.0%-0.0% | 0.0%-0.0% | 0.0%-0.0%  | 0.0%-0.4% |
| Pfulbp1-Gly2814Cys | 4/167     | 1/165     | 27/558    | 0/19      | 4/179     | 5/183     | 9/215     | 7/169     | 10/271    | 0/49      | 19/285    | 4/181     | 2/38       | 92/2479   |
|                    | 2.4%      | 0.6%      | 4.8%      | 0.0%      | 2.2%      | 2.7%      | 4.2%      | 4.1%      | 3.7%      | 0.0%      | 6.7%      | 2.2%      | 5.3%       | 3.7%      |
|                    | 0.4%-4.3% | 0.0%-1.6% | 3.3%-6.3% | 0.0%-0.0% | 0.4%-4.1% | 0.8%-4.7% | 1.9%-6.4% | 1.6%-6.7% | 1.8%-5.6% | 0.0%-0.0% | 4.2%-9.1% | 0.4%-4.0% | 0.0%-11.2% | 3.1%-4.3% |
| Pfulbp1-His1107Tyr | 0/76      | 0/97      | 0/420     | 0/8       | 0/145     | 1/88      | 0/147     | 0/95      | 1/207     | 0/31      | 1/222     | 0/39      | 0/21       | 3/1596    |
|                    | 0.0%      | 0.0%      | 0.0%      | 0.0%      | 0.0%      | 1.1%      | 0.0%      | 0.0%      | 0.5%      | 0.0%      | 0.5%      | 0.0%      | 0.0%       | 0.2%      |
|                    | 0.0%-0.0% | 0.0%-0.0% | 0.0%-0.0% | 0.0%-0.0% | 0.0%-0.0% | 0.0%-3.0% | 0.0%-0.0% | 0.0%-0.0% | 0.0%-1.3% | 0.0%-0.0% | 0.0%-1.2% | 0.0%-0.0% | 0.0%-0.0%  | 0.0%-0.4% |
| Pfulbp1-His1203Arg | 0/130     | 0/144     | 0/515     | 0/11      | 0/149     | 0/162     | 0/162     | 0/125     | 3/252     | 0/30      | 0/287     | 0/136     | 0/16       | 3/2119    |
|                    | 0.0%      | 0.0%      | 0.0%      | 0.0%      | 0.0%      | 0.0%      | 0.0%      | 0.0%      | 1.2%      | 0.0%      | 0.0%      | 0.0%      | 0.0%       | 0.1%      |
|                    | 0.0%-0.0% | 0.0%-0.0% | 0.0%-0.0% | 0.0%-0.0% | 0.0%-0.0% | 0.0%-0.0% | 0.0%-0.0% | 0.0%-0.0% | 0.1%-2.3% | 0.0%-0.0% | 0.0%-0.0% | 0.0%-0.0% | 0.0%-0.0%  | 0.0%-0.3% |
| Pfulbp1-His1406Leu | 0/12      | 0/64      | 2/213     | 0/1       | 1/109     | 1/52      | 0/111     | 0/44      | 0/90      | 0/17      | 0/71      | 0/14      | 0/11       | 4/809     |
|                    | 0.0%      | 0.0%      | 0.9%      | 0.0%      | 0.9%      | 1.9%      | 0.0%      | 0.0%      | 0.0%      | 0.0%      | 0.0%      | 0.0%      | 0.0%       | 0.5%      |
|                    | 0.0%-0.0% | 0.0%-0.0% | 0.0%-2.0% | 0.0%-0.0% | 0.0%-2.4% | 0.0%-5.1% | 0.0%-0.0% | 0.0%-0.0% | 0.0%-0.0% | 0.0%-0.0% | 0.0%-0.0% | 0.0%-0.0% | 0.0%-0.0%  | 0.1%-0.9% |
| Pfulbp1-His162Asn  | 0/192     | 7/194     | 73/561    | 0/18      | 6/181     | 9/207     | 42/229    | 0/185     | 11/294    | 0/41      | 6/352     | 3/211     | 0/40       | 157/2705  |
|                    | 0.0%      | 3.6%      | 13.0%     | 0.0%      | 3.3%      | 4.3%      | 18.3%     | 0.0%      | 3.7%      | 0.0%      | 1.7%      | 1.4%      | 0.0%       | 5.8%      |

|                   |            |           |             |           |           |           |             |           |           |            |           |           |           |           |
|-------------------|------------|-----------|-------------|-----------|-----------|-----------|-------------|-----------|-----------|------------|-----------|-----------|-----------|-----------|
|                   | 0.0%-0.0%  | 1.4%-5.8% | 10.7%-15.3% | 0.0%-0.0% | 1.1%-5.5% | 2.0%-6.7% | 14.1%-22.5% | 0.0%-0.0% | 1.9%-5.6% | 0.0%-0.0%  | 0.6%-2.8% | 0.1%-2.8% | 0.0%-0.0% | 5.1%-6.5% |
| Pfübp1-His1990Arg | 0/81       | 0/113     | 5/462       | 0/11      | 0/148     | 0/113     | 0/157       | 0/105     | 0/224     | 0/31       | 0/221     | 0/66      | 0/23      | 5/1755    |
|                   | 0.0%       | 0.0%      | 1.1%        | 0.0%      | 0.0%      | 0.0%      | 0.0%        | 0.0%      | 0.0%      | 0.0%       | 0.0%      | 0.0%      | 0.0%      | 0.3%      |
|                   | 0.0%-0.0%  | 0.0%-0.0% | 0.3%-1.9%   | 0.0%-0.0% | 0.0%-0.0% | 0.0%-0.0% | 0.0%-0.0%   | 0.0%-0.0% | 0.0%-0.0% | 0.0%-0.0%  | 0.0%-0.0% | 0.0%-0.0% | 0.0%-0.0% | 0.1%-0.5% |
| Pfübp1-His2001Pro | 0/81       | 0/113     | 4/462       | 0/11      | 0/148     | 0/113     | 1/157       | 0/105     | 0/224     | 2/31       | 0/221     | 0/66      | 0/23      | 7/1755    |
|                   | 0.0%       | 0.0%      | 0.9%        | 0.0%      | 0.0%      | 0.0%      | 0.6%        | 0.0%      | 0.0%      | 6.5%       | 0.0%      | 0.0%      | 0.0%      | 0.4%      |
|                   | 0.0%-0.0%  | 0.0%-0.0% | 0.2%-1.6%   | 0.0%-0.0% | 0.0%-0.0% | 0.0%-0.0% | 0.0%-1.7%   | 0.0%-0.0% | 0.0%-0.0% | 0.0%-13.7% | 0.0%-0.0% | 0.0%-0.0% | 0.0%-0.0% | 0.2%-0.6% |
| Pfübp1-His224Gln  | 1/86       | 0/86      | 3/411       | 0/6       | 0/131     | 0/102     | 1/133       | 0/92      | 4/187     | 1/22       | 1/186     | 0/53      | 0/18      | 11/1513   |
|                   | 1.2%       | 0.0%      | 0.7%        | 0.0%      | 0.0%      | 0.0%      | 0.8%        | 0.0%      | 2.1%      | 4.5%       | 0.5%      | 0.0%      | 0.0%      | 0.7%      |
|                   | 0.0%-3.1%  | 0.0%-0.0% | 0.0%-1.4%   | 0.0%-0.0% | 0.0%-0.0% | 0.0%-0.0% | 0.0%-2.0%   | 0.0%-0.0% | 0.4%-3.9% | 0.0%-11.9% | 0.0%-1.4% | 0.0%-0.0% | 0.0%-0.0% | 0.4%-1.1% |
| Pfübp1-His2370Tyr | 0/19       | 0/77      | 0/331       | 0/7       | 1/146     | 2/68      | 0/137       | 0/28      | 0/196     | 0/37       | 0/153     | 0/22      | 0/13      | 3/1234    |
|                   | 0.0%       | 0.0%      | 0.0%        | 0.0%      | 0.7%      | 2.9%      | 0.0%        | 0.0%      | 0.0%      | 0.0%       | 0.0%      | 0.0%      | 0.0%      | 0.2%      |
|                   | 0.0%-0.0%  | 0.0%-0.0% | 0.0%-0.0%   | 0.0%-0.0% | 0.0%-1.8% | 0.0%-6.3% | 0.0%-0.0%   | 0.0%-0.0% | 0.0%-0.0% | 0.0%-0.0%  | 0.0%-0.0% | 0.0%-0.0% | 0.0%-0.0% | 0.0%-0.5% |
| Pfübp1-His2552Tyr | 0/70       | 1/101     | 8/459       | 0/10      | 0/145     | 1/107     | 1/156       | 0/88      | 0/243     | 0/32       | 1/250     | 1/60      | 0/24      | 13/1745   |
|                   | 0.0%       | 1.0%      | 1.7%        | 0.0%      | 0.0%      | 0.9%      | 0.6%        | 0.0%      | 0.0%      | 0.0%       | 0.4%      | 1.7%      | 0.0%      | 0.7%      |
|                   | 0.0%-0.0%  | 0.0%-2.6% | 0.7%-2.7%   | 0.0%-0.0% | 0.0%-0.0% | 0.0%-2.5% | 0.0%-1.7%   | 0.0%-0.0% | 0.0%-0.0% | 0.0%-0.0%  | 0.0%-1.1% | 0.0%-4.4% | 0.0%-0.0% | 0.4%-1.1% |
| Pfübp1-His2904Pro | 0/131      | 0/145     | 0/537       | 0/23      | 0/181     | 0/160     | 3/209       | 0/159     | 0/277     | 0/53       | 0/289     | 0/125     | 0/40      | 3/2329    |
|                   | 0.0%       | 0.0%      | 0.0%        | 0.0%      | 0.0%      | 0.0%      | 1.4%        | 0.0%      | 0.0%      | 0.0%       | 0.0%      | 0.0%      | 0.0%      | 0.1%      |
|                   | 0.0%-0.0%  | 0.0%-0.0% | 0.0%-0.0%   | 0.0%-0.0% | 0.0%-0.0% | 0.0%-0.0% | 0.1%-2.8%   | 0.0%-0.0% | 0.0%-0.0% | 0.0%-0.0%  | 0.0%-0.0% | 0.0%-0.0% | 0.0%-0.0% | 0.0%-0.3% |
| Pfübp1-His2940Tyr | 0/123      | 0/140     | 2/521       | 0/23      | 0/172     | 0/148     | 0/201       | 0/156     | 0/255     | 0/48       | 2/273     | 0/122     | 0/38      | 4/2220    |
|                   | 0.0%       | 0.0%      | 0.4%        | 0.0%      | 0.0%      | 0.0%      | 0.0%        | 0.0%      | 0.0%      | 0.0%       | 0.7%      | 0.0%      | 0.0%      | 0.2%      |
|                   | 0.0%-0.0%  | 0.0%-0.0% | 0.0%-0.8%   | 0.0%-0.0% | 0.0%-0.0% | 0.0%-0.0% | 0.0%-0.0%   | 0.0%-0.0% | 0.0%-0.0% | 0.0%-0.0%  | 0.0%-1.6% | 0.0%-0.0% | 0.0%-0.0% | 0.0%-0.3% |
| Pfübp1-His3074Arg | 2/132      | 2/176     | 1/549       | 0/13      | 1/169     | 3/172     | 2/201       | 2/144     | 1/273     | 0/41       | 0/331     | 1/165     | 0/26      | 15/2392   |
|                   | 1.5%       | 1.1%      | 0.2%        | 0.0%      | 0.6%      | 1.7%      | 1.0%        | 1.4%      | 0.4%      | 0.0%       | 0.0%      | 0.6%      | 0.0%      | 0.6%      |
|                   | 0.0%-3.3%  | 0.0%-2.5% | 0.0%-0.5%   | 0.0%-0.0% | 0.0%-1.6% | 0.1%-3.4% | 0.0%-2.1%   | 0.0%-3.0% | 0.0%-1.0% | 0.0%-0.0%  | 0.0%-0.0% | 0.0%-1.6% | 0.0%-0.0% | 0.4%-0.9% |
| Pfübp1-His321Pro  | 0/100      | 3/137     | 1/475       | 0/13      | 0/161     | 0/141     | 2/170       | 0/123     | 0/226     | 0/42       | 0/251     | 0/99      | 0/20      | 6/1958    |
|                   | 0.0%       | 2.2%      | 0.2%        | 0.0%      | 0.0%      | 0.0%      | 1.2%        | 0.0%      | 0.0%      | 0.0%       | 0.0%      | 0.0%      | 0.0%      | 0.3%      |
|                   | 0.0%-0.0%  | 0.1%-4.2% | 0.0%-0.6%   | 0.0%-0.0% | 0.0%-0.0% | 0.0%-0.0% | 0.0%-2.5%   | 0.0%-0.0% | 0.0%-0.0% | 0.0%-0.0%  | 0.0%-0.0% | 0.0%-0.0% | 0.0%-0.0% | 0.1%-0.5% |
| Pfübp1-His504Tyr  | 1/20       | 0/71      | 0/294       | 0/7       | 0/127     | 0/61      | 0/129       | 0/29      | 0/169     | 0/29       | 2/129     | 0/21      | 0/15      | 3/1101    |
|                   | 5.0%       | 0.0%      | 0.0%        | 0.0%      | 0.0%      | 0.0%      | 0.0%        | 0.0%      | 0.0%      | 0.0%       | 1.6%      | 0.0%      | 0.0%      | 0.3%      |
|                   | 0.0%-13.0% | 0.0%-0.0% | 0.0%-0.0%   | 0.0%-0.0% | 0.0%-0.0% | 0.0%-0.0% | 0.0%-0.0%   | 0.0%-0.0% | 0.0%-0.0% | 0.0%-0.0%  | 0.0%-3.3% | 0.0%-0.0% | 0.0%-0.0% | 0.0%-0.5% |
| Pfübp1-Ile1094Leu | 0/30       | 3/72      | 5/311       | 0/4       | 0/128     | 0/57      | 0/127       | 0/76      | 0/137     | 0/22       | 0/117     | 0/22      | 0/13      | 8/1116    |
|                   | 0.0%       | 4.2%      | 1.6%        | 0.0%      | 0.0%      | 0.0%      | 0.0%        | 0.0%      | 0.0%      | 0.0%       | 0.0%      | 0.0%      | 0.0%      | 0.7%      |
|                   | 0.0%-0.0%  | 0.3%-8.0% | 0.4%-2.8%   | 0.0%-0.0% | 0.0%-0.0% | 0.0%-0.0% | 0.0%-0.0%   | 0.0%-0.0% | 0.0%-0.0% | 0.0%-0.0%  | 0.0%-0.0% | 0.0%-0.0% | 0.0%-0.0% | 0.3%-1.1% |
| Pfübp1-Ile1210Asn | 0/161      | 2/171     | 0/562       | 0/17      | 0/183     | 0/185     | 0/209       | 0/149     | 2/299     | 0/41       | 0/343     | 0/174     | 0/38      | 4/2532    |
|                   | 0.0%       | 1.2%      | 0.0%        | 0.0%      | 0.0%      | 0.0%      | 0.0%        | 0.0%      | 0.7%      | 0.0%       | 0.0%      | 0.0%      | 0.0%      | 0.2%      |
|                   | 0.0%-0.0%  | 0.0%-2.5% | 0.0%-0.0%   | 0.0%-0.0% | 0.0%-0.0% | 0.0%-0.0% | 0.0%-0.0%   | 0.0%-0.0% | 0.0%-1.4% | 0.0%-0.0%  | 0.0%-0.0% | 0.0%-0.0% | 0.0%-0.0% | 0.0%-0.3% |
| Pfübp1-Ile1874Val | 0/180      | 0/167     | 2/564       | 0/21      | 0/193     | 0/188     | 0/223       | 1/182     | 0/294     | 0/53       | 0/324     | 0/159     | 0/45      | 3/2593    |
|                   | 0.0%       | 0.0%      | 0.4%        | 0.0%      | 0.0%      | 0.0%      | 0.0%        | 0.5%      | 0.0%      | 0.0%       | 0.0%      | 0.0%      | 0.0%      | 0.1%      |
|                   | 0.0%-0.0%  | 0.0%-0.0% | 0.0%-0.8%   | 0.0%-0.0% | 0.0%-0.0% | 0.0%-0.0% | 0.0%-0.0%   | 0.0%-1.5% | 0.0%-0.0% | 0.0%-0.0%  | 0.0%-0.0% | 0.0%-0.0% | 0.0%-0.0% | 0.0%-0.2% |
| Pfübp1-Ile1980Thr | 0/147      | 0/157     | 0/546       | 0/19      | 0/176     | 2/170     | 2/205       | 0/161     | 0/284     | 0/49       | 1/318     | 3/163     | 0/32      | 8/2427    |
|                   | 0.0%       | 0.0%      | 0.0%        | 0.0%      | 0.0%      | 1.2%      | 1.0%        | 0.0%      | 0.0%      | 0.0%       | 0.3%      | 1.8%      | 0.0%      | 0.3%      |
|                   | 0.0%-0.0%  | 0.0%-0.0% | 0.0%-0.0%   | 0.0%-0.0% | 0.0%-0.0% | 0.0%-2.5% | 0.0%-2.1%   | 0.0%-0.0% | 0.0%-0.0% | 0.0%-0.0%  | 0.0%-0.8% | 0.1%-3.6% | 0.0%-0.0% | 0.1%-0.5% |
| Pfübp1-Ile2287Leu | 0/92       | 0/124     | 1/489       | 0/13      | 0/153     | 0/120     | 3/170       | 0/112     | 3/245     | 0/41       | 0/241     | 0/61      | 0/29      | 7/1890    |

|                   |               |             |             |               |              |             |             |              |             |              |              |               |              |             |
|-------------------|---------------|-------------|-------------|---------------|--------------|-------------|-------------|--------------|-------------|--------------|--------------|---------------|--------------|-------------|
|                   | 0.0%          | 0.0%        | 0.2%        | 0.0%          | 0.0%         | 0.0%        | 1.8%        | 0.0%         | 1.2%        | 0.0%         | 0.0%         | 0.0%          | 0.0%         | 0.4%        |
|                   | 0.0%-0.0%     | 0.0%-0.0%   | 0.0%-0.5%   | 0.0%-0.0%     | 0.0%-0.0%    | 0.0%-0.0%   | 0.1%-3.4%   | 0.0%-0.0%    | 0.1%-2.4%   | 0.0%-0.0%    | 0.0%-0.0%    | 0.0%-0.0%     | 0.0%-0.0%    | 0.1%-0.6%   |
| Pfubp1-Ile3137Val | 0/126         | 0/164       | 0/530       | 0/12          | 0/171        | 0/159       | 0/188       | 15/144       | 0/277       | 0/33         | 0/267        | 0/173         | 0/25         | 15/2269     |
|                   | 0.0%          | 0.0%        | 0.0%        | 0.0%          | 0.0%         | 0.0%        | 0.0%        | 10.4%        | 0.0%        | 0.0%         | 0.0%         | 0.0%          | 0.0%         | 0.7%        |
|                   | 0.0%-0.0%     | 0.0%-0.0%   | 0.0%-0.0%   | 0.0%-0.0%     | 0.0%-0.0%    | 0.0%-0.0%   | 0.0%-0.0%   | 6.2%-14.6%   | 0.0%-0.0%   | 0.0%-0.0%    | 0.0%-0.0%    | 0.0%-0.0%     | 0.0%-0.0%    | 0.4%-0.9%   |
| Pfubp1-Ile47Met   | 0/2           | 0/56        | 0/236       | 0/1           | 0/105        | 0/45        | 3/110       | 0/14         | 0/88        | 0/20         | 0/81         | 0/16          | 0/4          | 3/778       |
|                   | 0.0%          | 0.0%        | 0.0%        | 0.0%          | 0.0%         | 0.0%        | 2.7%        | 0.0%         | 0.0%        | 0.0%         | 0.0%         | 0.0%          | 0.0%         | 0.4%        |
|                   | 0.0%-0.0%     | 0.0%-0.0%   | 0.0%-0.0%   | 0.0%-0.0%     | 0.0%-0.0%    | 0.0%-0.0%   | 0.2%-5.3%   | 0.0%-0.0%    | 0.0%-0.0%   | 0.0%-0.0%    | 0.0%-0.0%    | 0.0%-0.0%     | 0.0%-0.0%    | 0.0%-0.8%   |
| Pfubp1-Leu153Phe  | 1/192         | 0/194       | 0/560       | 0/18          | 1/181        | 1/207       | 0/229       | 0/185        | 0/294       | 0/41         | 0/352        | 0/211         | 0/40         | 3/2704      |
|                   | 0.5%          | 0.0%        | 0.0%        | 0.0%          | 0.6%         | 0.5%        | 0.0%        | 0.0%         | 0.0%        | 0.0%         | 0.0%         | 0.0%          | 0.0%         | 0.1%        |
|                   | 0.0%-1.4%     | 0.0%-0.0%   | 0.0%-0.0%   | 0.0%-0.0%     | 0.0%-1.5%    | 0.0%-1.3%   | 0.0%-0.0%   | 0.0%-0.0%    | 0.0%-0.0%   | 0.0%-0.0%    | 0.0%-0.0%    | 0.0%-0.0%     | 0.0%-0.0%    | 0.0%-0.2%   |
| Pfubp1-Leu2258Ile | 2/82          | 2/111       | 13/461      | 0/11          | 4/147        | 5/106       | 1/158       | 0/102        | 1/216       | 2/35         | 2/219        | 2/53          | 3/22         | 37/1723     |
|                   | 2.4%          | 1.8%        | 2.8%        | 0.0%          | 2.7%         | 4.7%        | 0.6%        | 0.0%         | 0.5%        | 5.7%         | 0.9%         | 3.8%          | 13.6%        | 2.1%        |
|                   | 0.0%-5.2%     | 0.0%-3.9%   | 1.6%-4.1%   | 0.0%-0.0%     | 0.5%-4.9%    | 1.3%-8.1%   | 0.0%-1.7%   | 0.0%-0.0%    | 0.0%-1.2%   | 0.0%-12.2%   | 0.0%-2.0%    | 0.0%-8.1%     | 1.6%-25.7%   | 1.6%-2.7%   |
| Pfubp1-Leu879Phe  | 0/34          | 0/70        | 2/323       | 0/3           | 0/130        | 0/56        | 0/121       | 0/68         | 0/161       | 0/26         | 1/159        | 0/24          | 0/11         | 3/1186      |
|                   | 0.0%          | 0.0%        | 0.6%        | 0.0%          | 0.0%         | 0.0%        | 0.0%        | 0.0%         | 0.0%        | 0.0%         | 0.6%         | 0.0%          | 0.0%         | 0.3%        |
|                   | 0.0%-0.0%     | 0.0%-0.0%   | 0.0%-1.3%   | 0.0%-0.0%     | 0.0%-0.0%    | 0.0%-0.0%   | 0.0%-0.0%   | 0.0%-0.0%    | 0.0%-0.0%   | 0.0%-0.0%    | 0.0%-1.7%    | 0.0%-0.0%     | 0.0%-0.0%    | 0.0%-0.5%   |
| Pfubp1-Lys1193Thr | 1/130         | 6/144       | 37/515      | 0/11          | 7/149        | 7/162       | 12/162      | 5/125        | 11/252      | 0/30         | 2/287        | 7/136         | 0/16         | 95/2119     |
|                   | 0.8%          | 4.2%        | 7.2%        | 0.0%          | 4.7%         | 4.3%        | 7.4%        | 4.0%         | 4.4%        | 0.0%         | 0.7%         | 5.1%          | 0.0%         | 4.5%        |
|                   | 0.0%-2.0%     | 1.4%-6.9%   | 5.3%-9.1%   | 0.0%-0.0%     | 1.8%-7.5%    | 1.7%-6.9%   | 4.0%-10.8%  | 1.1%-6.9%    | 2.2%-6.5%   | 0.0%-0.0%    | 0.0%-1.5%    | 2.0%-8.3%     | 0.0%-0.0%    | 3.7%-5.2%   |
| Pfubp1-Lys147Asn  | 1/192         | 0/194       | 1/560       | 0/18          | 0/181        | 0/207       | 0/229       | 1/185        | 0/294       | 0/41         | 3/352        | 0/211         | 0/40         | 6/2704      |
|                   | 0.5%          | 0.0%        | 0.2%        | 0.0%          | 0.0%         | 0.0%        | 0.0%        | 0.5%         | 0.0%        | 0.0%         | 0.9%         | 0.0%          | 0.0%         | 0.2%        |
|                   | 0.0%-1.4%     | 0.0%-0.0%   | 0.0%-0.5%   | 0.0%-0.0%     | 0.0%-0.0%    | 0.0%-0.0%   | 0.0%-0.0%   | 0.0%-1.4%    | 0.0%-0.0%   | 0.0%-0.0%    | 0.0%-1.7%    | 0.0%-0.0%     | 0.0%-0.0%    | 0.1%-0.4%   |
| Pfubp1-Lys1705Asn | 3/103         | 1/110       | 4/455       | 0/5           | 1/139        | 1/113       | 2/149       | 0/104        | 1/204       | 0/29         | 0/239        | 0/97          | 0/15         | 13/1762     |
|                   | 2.9%          | 0.9%        | 0.9%        | 0.0%          | 0.7%         | 0.9%        | 1.3%        | 0.0%         | 0.5%        | 0.0%         | 0.0%         | 0.0%          | 0.0%         | 0.7%        |
|                   | 0.2%-5.6%     | 0.0%-2.4%   | 0.2%-1.6%   | 0.0%-0.0%     | 0.0%-1.9%    | 0.0%-2.3%   | 0.0%-2.9%   | 0.0%-0.0%    | 0.0%-1.3%   | 0.0%-0.0%    | 0.0%-0.0%    | 0.0%-0.0%     | 0.0%-0.0%    | 0.4%-1.1%   |
| Pfubp1-Lys1780Arg | 0/1           | 0/69        | 0/251       | 0/3           | 0/118        | 0/54        | 4/113       | 0/3          | 0/108       | 0/18         | 0/77         | 0/19          | 0/9          | 4/843       |
|                   | 0.0%          | 0.0%        | 0.0%        | 0.0%          | 0.0%         | 0.0%        | 3.5%        | 0.0%         | 0.0%        | 0.0%         | 0.0%         | 0.0%          | 0.0%         | 0.5%        |
|                   | 0.0%-0.0%     | 0.0%-0.0%   | 0.0%-0.0%   | 0.0%-0.0%     | 0.0%-0.0%    | 0.0%-0.0%   | 0.7%-6.4%   | 0.0%-0.0%    | 0.0%-0.0%   | 0.0%-0.0%    | 0.0%-0.0%    | 0.0%-0.0%     | 0.0%-0.0%    | 0.1%-0.9%   |
| Pfubp1-Lys1914Asn | 173/176       | 187/194     | 527/533     | 19/19         | 186/187      | 195/200     | 219/227     | 184/186      | 262/268     | 36/38        | 292/296      | 220/222       | 33/33        | 2533/2579   |
|                   | 98.3%         | 96.4%       | 98.9%       | 100.0%        | 99.5%        | 97.5%       | 96.5%       | 98.9%        | 97.8%       | 94.7%        | 98.6%        | 99.1%         | 100.0%       | 98.2%       |
|                   | 96.7%-99.9%   | 94.2%-98.6% | 98.1%-99.6% | 100.0%-100.0% | 98.6%-100.0% | 95.7%-99.3% | 94.5%-98.5% | 97.7%-100.0% | 96.3%-99.2% | 88.8%-100.0% | 97.5%-99.8%  | 98.1%-100.0%  | 00.0%-100.0% | 97.8%-98.6% |
| Pfubp1-Lys1921Asn | 55/171        | 39/182      | 205/520     | 11/18         | 62/180       | 44/185      | 79/211      | 37/181       | 86/256      | 6/33         | 99/287       | 64/199        | 4/32         | 791/2455    |
|                   | 32.2%         | 21.4%       | 39.4%       | 61.1%         | 34.4%        | 23.8%       | 37.4%       | 20.4%        | 33.6%       | 18.2%        | 34.5%        | 32.2%         | 12.5%        | 32.2%       |
|                   | 26.3%-38.0%   | 16.4%-26.4% | 35.9%-42.9% | 42.2%-80.0%   | 28.6%-40.3%  | 18.6%-28.9% | 32.0%-42.9% | 15.5%-25.4%  | 28.7%-38.4% | 7.1%-29.2%   | 29.9%-39.1%  | 26.7%-37.6%   | 2.9%-22.1%   | 30.7%-33.8% |
| Pfubp1-Lys1928Asn | 3/47          | 8/69        | 27/265      | 1/9           | 2/69         | 2/52        | 11/114      | 7/72         | 17/91       | 1/12         | 16/126       | 2/58          | 1/4          | 98/988      |
|                   | 6.4%          | 11.6%       | 10.2%       | 11.1%         | 2.9%         | 3.8%        | 9.6%        | 9.7%         | 18.7%       | 8.3%         | 12.7%        | 3.4%          | 25.0%        | 9.9%        |
|                   | 0.5%-12.2%    | 5.3%-17.9%  | 7.1%-13.2%  | 0.0%-28.3%    | 0.0%-6.2%    | 0.0%-8.2%   | 5.1%-14.2%  | 4.0%-15.5%   | 12.0%-25.4% | 0.0%-21.5%   | 7.8%-17.6%   | 0.0%-7.4%     | 0.0%-60.6%   | 8.4%-11.5%  |
| Pfubp1-Lys1936Glu | 1/1           | 1/2         | 11/29       | no coverage   | 0/1          | 1/2         | 8/23        | 9/13         | 1/2         | 0/1          | 5/6          | 1/1           | 1/1          | 39/82       |
|                   | 100.0%        | 50.0%       | 37.9%       | no coverage   | 0.0%         | 50.0%       | 34.8%       | 69.2%        | 50.0%       | 0.0%         | 83.3%        | 100.0%        | 100.0%       | 47.6%       |
|                   | 100.0%-100.0% | 0.0%-100.0% | 23.1%-52.8% | no coverage   | 0.0%-0.0%    | 0.0%-100.0% | 18.4%-51.1% | 48.2%-90.3%  | 0.0%-100.0% | 0.0%-0.0%    | 58.3%-100.0% | 100.0%-100.0% | 00.0%-100.0% | 38.5%-56.6% |
| Pfubp1-Lys1949Asn | 1/28          | 2/75        | 17/399      | 0/3           | 3/60         | 3/61        | 3/105       | 1/50         | 5/162       | 3/25         | 2/175        | 0/38          | 0/6          | 40/1187     |
|                   | 3.6%          | 2.7%        | 4.3%        | 0.0%          | 5.0%         | 4.9%        | 2.9%        | 2.0%         | 3.1%        | 12.0%        | 1.1%         | 0.0%          | 0.0%         | 3.4%        |
|                   | 0.0%-9.3%     | 0.0%-5.7%   | 2.6%-5.9%   | 0.0%-0.0%     | 0.4%-9.6%    | 0.4%-9.5%   | 0.2%-5.5%   | 0.0%-5.3%    | 0.9%-5.3%   | 1.3%-22.7%   | 0.0%-2.5%    | 0.0%-0.0%     | 0.0%-0.0%    | 2.5%-4.2%   |

|                    |             |             |             |             |             |             |             |             |             |             |             |             |              |             |
|--------------------|-------------|-------------|-------------|-------------|-------------|-------------|-------------|-------------|-------------|-------------|-------------|-------------|--------------|-------------|
| Pfulbp1-Lys1950Glu | 0/28        | 1/75        | 0/399       | 0/3         | 0/60        | 1/61        | 0/105       | 0/50        | 0/162       | 0/25        | 0/175       | 1/38        | 0/6          | 3/1187      |
|                    | 0.0%        | 1.3%        | 0.0%        | 0.0%        | 0.0%        | 1.6%        | 0.0%        | 0.0%        | 0.0%        | 0.0%        | 0.0%        | 2.6%        | 0.0%         | 0.3%        |
|                    | 0.0%-0.0%   | 0.0%-3.5%   | 0.0%-0.0%   | 0.0%-0.0%   | 0.0%-0.0%   | 0.0%-4.3%   | 0.0%-0.0%   | 0.0%-0.0%   | 0.0%-0.0%   | 0.0%-0.0%   | 0.0%-0.0%   | 0.0%-6.9%   | 0.0%-0.0%    | 0.0%-0.5%   |
| Pfulbp1-Lys1956Asn | 7/88        | 3/112       | 27/472      | 0/8         | 2/87        | 3/102       | 13/144      | 7/92        | 14/212      | 0/29        | 9/241       | 0/86        | 0/11         | 85/1684     |
|                    | 8.0%        | 2.7%        | 5.7%        | 0.0%        | 2.3%        | 2.9%        | 9.0%        | 7.6%        | 6.6%        | 0.0%        | 3.7%        | 0.0%        | 0.0%         | 5.0%        |
|                    | 3.2%-12.7%  | 0.2%-5.2%   | 4.0%-7.5%   | 0.0%-0.0%   | 0.0%-4.9%   | 0.2%-5.7%   | 5.1%-13.0%  | 3.1%-12.2%  | 3.8%-9.4%   | 0.0%-0.0%   | 1.7%-5.7%   | 0.0%-0.0%   | 0.0%-0.0%    | 4.2%-5.9%   |
| Pfulbp1-Lys1957Glu | 1/88        | 0/112       | 0/472       | 0/8         | 0/87        | 0/102       | 0/144       | 0/92        | 0/212       | 0/29        | 0/241       | 3/86        | 0/11         | 4/1684      |
|                    | 1.1%        | 0.0%        | 0.0%        | 0.0%        | 0.0%        | 0.0%        | 0.0%        | 0.0%        | 0.0%        | 0.0%        | 0.0%        | 3.5%        | 0.0%         | 0.2%        |
|                    | 0.0%-3.0%   | 0.0%-0.0%   | 0.0%-0.0%   | 0.0%-0.0%   | 0.0%-0.0%   | 0.0%-0.0%   | 0.0%-0.0%   | 0.0%-0.0%   | 0.0%-0.0%   | 0.0%-0.0%   | 0.0%-0.0%   | 0.2%-6.7%   | 0.0%-0.0%    | 0.0%-0.4%   |
| Pfulbp1-Lys2809Asn | 0/65        | 0/93        | 1/395       | 0/15        | 2/155       | 0/84        | 2/167       | 0/90        | 4/199       | 0/36        | 3/203       | 0/46        | 0/31         | 12/1579     |
|                    | 0.0%        | 0.0%        | 0.3%        | 0.0%        | 1.3%        | 0.0%        | 1.2%        | 0.0%        | 2.0%        | 0.0%        | 1.5%        | 0.0%        | 0.0%         | 0.8%        |
|                    | 0.0%-0.0%   | 0.0%-0.0%   | 0.0%-0.7%   | 0.0%-0.0%   | 0.0%-2.8%   | 0.0%-0.0%   | 0.0%-2.6%   | 0.0%-0.0%   | 0.4%-3.6%   | 0.0%-0.0%   | 0.1%-2.9%   | 0.0%-0.0%   | 0.0%-0.0%    | 0.4%-1.1%   |
| Pfulbp1-Lys2817Asn | 3/167       | 0/165       | 16/558      | 1/19        | 4/179       | 3/183       | 12/215      | 4/169       | 0/271       | 2/49        | 8/285       | 2/181       | 1/38         | 56/2479     |
|                    | 1.8%        | 0.0%        | 2.9%        | 5.3%        | 2.2%        | 1.6%        | 5.6%        | 2.4%        | 0.0%        | 4.1%        | 2.8%        | 1.1%        | 2.6%         | 2.3%        |
|                    | 0.1%-3.5%   | 0.0%-0.0%   | 1.7%-4.0%   | 0.0%-13.7%  | 0.4%-4.1%   | 0.1%-3.2%   | 3.0%-8.2%   | 0.4%-4.3%   | 0.0%-0.0%   | 0.0%-8.7%   | 1.2%-4.4%   | 0.0%-2.4%   | 0.0%-6.9%    | 1.8%-2.7%   |
| Pfulbp1-Lys2843Asn | 2/166       | 1/164       | 0/557       | 0/18        | 1/178       | 3/182       | 0/214       | 1/169       | 0/270       | 0/48        | 0/284       | 0/181       | 0/37         | 8/2468      |
|                    | 1.2%        | 0.6%        | 0.0%        | 0.0%        | 0.6%        | 1.6%        | 0.0%        | 0.6%        | 0.0%        | 0.0%        | 0.0%        | 0.0%        | 0.0%         | 0.3%        |
|                    | 0.0%-2.6%   | 0.0%-1.6%   | 0.0%-0.0%   | 0.0%-0.0%   | 0.0%-1.5%   | 0.1%-3.2%   | 0.0%-0.0%   | 0.0%-1.6%   | 0.0%-0.0%   | 0.0%-0.0%   | 0.0%-0.0%   | 0.0%-0.0%   | 0.0%-0.0%    | 0.1%-0.5%   |
| Pfulbp1-Lys3209Asn | 0/26        | 0/76        | 0/347       | 0/12        | 0/140       | 3/72        | 0/146       | 0/41        | 0/188       | 0/26        | 0/153       | 0/32        | 0/21         | 3/1280      |
|                    | 0.0%        | 0.0%        | 0.0%        | 0.0%        | 0.0%        | 4.2%        | 0.0%        | 0.0%        | 0.0%        | 0.0%        | 0.0%        | 0.0%        | 0.0%         | 0.2%        |
|                    | 0.0%-0.0%   | 0.0%-0.0%   | 0.0%-0.0%   | 0.0%-0.0%   | 0.0%-0.0%   | 0.3%-8.0%   | 0.0%-0.0%   | 0.0%-0.0%   | 0.0%-0.0%   | 0.0%-0.0%   | 0.0%-0.0%   | 0.0%-0.0%   | 0.0%-0.0%    | 0.0%-0.5%   |
| Pfulbp1-Lys779Asn  | 6/112       | 8/95        | 7/346       | 0/5         | 5/83        | 11/92       | 4/133       | 5/125       | 15/179      | 0/14        | 3/204       | 6/136       | 0/4          | 70/1528     |
|                    | 5.4%        | 8.4%        | 2.0%        | 0.0%        | 6.0%        | 12.0%       | 3.0%        | 4.0%        | 8.4%        | 0.0%        | 1.5%        | 4.4%        | 0.0%         | 4.6%        |
|                    | 1.9%-8.9%   | 3.7%-13.1%  | 0.8%-3.3%   | 0.0%-0.0%   | 1.7%-10.3%  | 6.4%-17.5%  | 0.6%-5.4%   | 1.1%-6.9%   | 5.0%-11.8%  | 0.0%-0.0%   | 0.1%-2.9%   | 1.5%-7.3%   | 0.0%-0.0%    | 3.7%-5.5%   |
| Pfulbp1-Lys877Arg  | 0/34        | 0/70        | 5/323       | 0/3         | 0/130       | 0/56        | 5/121       | 0/68        | 0/161       | 0/26        | 4/159       | 0/24        | 0/11         | 14/1186     |
|                    | 0.0%        | 0.0%        | 1.5%        | 0.0%        | 0.0%        | 0.0%        | 4.1%        | 0.0%        | 0.0%        | 0.0%        | 2.5%        | 0.0%        | 0.0%         | 1.2%        |
|                    | 0.0%-0.0%   | 0.0%-0.0%   | 0.4%-2.7%   | 0.0%-0.0%   | 0.0%-0.0%   | 0.0%-0.0%   | 1.2%-7.1%   | 0.0%-0.0%   | 0.0%-0.0%   | 0.0%-0.0%   | 0.5%-4.6%   | 0.0%-0.0%   | 0.0%-0.0%    | 0.7%-1.7%   |
| Pfulbp1-Lys895Asn  | 0/15        | 1/64        | 6/221       | 0/2         | 0/80        | 0/54        | 4/104       | 0/20        | 1/98        | 0/21        | 0/76        | 0/17        | 0/5          | 12/777      |
|                    | 0.0%        | 1.6%        | 2.7%        | 0.0%        | 0.0%        | 0.0%        | 3.8%        | 0.0%        | 1.0%        | 0.0%        | 0.0%        | 0.0%        | 0.0%         | 1.5%        |
|                    | 0.0%-0.0%   | 0.0%-4.1%   | 0.9%-4.5%   | 0.0%-0.0%   | 0.0%-0.0%   | 0.0%-0.0%   | 0.7%-6.9%   | 0.0%-0.0%   | 0.0%-2.7%   | 0.0%-0.0%   | 0.0%-0.0%   | 0.0%-0.0%   | 0.0%-0.0%    | 0.8%-2.3%   |
| Pfulbp1-Lys906Asn  | 5/15        | 38/65       | 164/219     | 1/2         | 47/79       | 32/54       | 80/103      | 13/20       | 61/98       | 9/21        | 42/76       | 10/17       | 3/4          | 505/773     |
|                    | 33.3%       | 58.5%       | 74.9%       | 50.0%       | 59.5%       | 59.3%       | 77.7%       | 65.0%       | 62.2%       | 42.9%       | 55.3%       | 58.8%       | 75.0%        | 65.3%       |
|                    | 13.3%-53.4% | 48.4%-68.5% | 70.1%-79.7% | 0.0%-100.0% | 50.4%-68.6% | 48.3%-70.3% | 70.9%-84.4% | 47.5%-82.5% | 54.2%-70.3% | 25.1%-60.6% | 45.9%-64.6% | 39.2%-78.5% | 39.4%-100.0% | 62.5%-68.1% |
| Pfulbp1-Met1178Val | 1/130       | 0/144       | 1/515       | 0/11        | 1/149       | 0/162       | 0/162       | 0/125       | 0/252       | 0/30        | 0/287       | 0/136       | 0/16         | 3/2119      |
|                    | 0.8%        | 0.0%        | 0.2%        | 0.0%        | 0.7%        | 0.0%        | 0.0%        | 0.0%        | 0.0%        | 0.0%        | 0.0%        | 0.0%        | 0.0%         | 0.1%        |
|                    | 0.0%-2.0%   | 0.0%-0.0%   | 0.0%-0.5%   | 0.0%-0.0%   | 0.0%-1.8%   | 0.0%-0.0%   | 0.0%-0.0%   | 0.0%-0.0%   | 0.0%-0.0%   | 0.0%-0.0%   | 0.0%-0.0%   | 0.0%-0.0%   | 0.0%-0.0%    | 0.0%-0.3%   |
| Pfulbp1-Met163Ile  | 0/192       | 29/194      | 154/561     | 1/18        | 42/181      | 29/207      | 89/229      | 0/185       | 47/294      | 0/41        | 29/352      | 5/211       | 1/40         | 426/2705    |
|                    | 0.0%        | 14.9%       | 27.5%       | 5.6%        | 23.2%       | 14.0%       | 38.9%       | 0.0%        | 16.0%       | 0.0%        | 8.2%        | 2.4%        | 2.5%         | 15.7%       |
|                    | 0.0%-0.0%   | 10.7%-19.2% | 24.4%-30.6% | 0.0%-14.4%  | 18.0%-28.4% | 10.0%-18.0% | 33.6%-44.2% | 0.0%-0.0%   | 12.5%-19.5% | 0.0%-0.0%   | 5.8%-10.6%  | 0.6%-4.1%   | 0.0%-6.6%    | 14.6%-16.9% |
| Pfulbp1-Met193Leu  | 0/195       | 0/196       | 0/576       | 0/22        | 0/194       | 0/216       | 0/251       | 0/212       | 3/295       | 0/41        | 0/335       | 0/230       | 0/49         | 3/2812      |
|                    | 0.0%        | 0.0%        | 0.0%        | 0.0%        | 0.0%        | 0.0%        | 0.0%        | 0.0%        | 1.0%        | 0.0%        | 0.0%        | 0.0%        | 0.0%         | 0.1%        |
|                    | 0.0%-0.0%   | 0.0%-0.0%   | 0.0%-0.0%   | 0.0%-0.0%   | 0.0%-0.0%   | 0.0%-0.0%   | 0.0%-0.0%   | 0.0%-0.0%   | 0.1%-2.0%   | 0.0%-0.0%   | 0.0%-0.0%   | 0.0%-0.0%   | 0.0%-0.0%    | 0.0%-0.2%   |
| Pfulbp1-Met2618Val | 0/8         | 3/76        | 7/314       | 0/10        | 8/143       | 3/67        | 11/143      | 0/23        | 2/186       | 0/33        | 5/132       | 1/23        | 0/22         | 40/1180     |
|                    | 0.0%        | 3.9%        | 2.2%        | 0.0%        | 5.6%        | 4.5%        | 7.7%        | 0.0%        | 1.1%        | 0.0%        | 3.8%        | 4.3%        | 0.0%         | 3.4%        |

|                   |             |           |           |             |           |           |            |             |            |           |           |            |             |           |
|-------------------|-------------|-----------|-----------|-------------|-----------|-----------|------------|-------------|------------|-----------|-----------|------------|-------------|-----------|
|                   | 0.0%-0.0%   | 0.3%-7.6% | 0.9%-3.6% | 0.0%-0.0%   | 2.4%-8.8% | 0.3%-8.6% | 4.0%-11.4% | 0.0%-0.0%   | 0.0%-2.3%  | 0.0%-0.0% | 1.1%-6.5% | 0.0%-11.3% | 0.0%-0.0%   | 2.5%-4.3% |
| Pfubp1-Met3069Leu | 0/126       | 2/162     | 2/537     | 0/13        | 1/163     | 0/159     | 0/191      | 0/134       | 1/269      | 0/40      | 0/320     | 0/143      | 0/25        | 6/2282    |
|                   | 0.0%        | 1.2%      | 0.4%      | 0.0%        | 0.6%      | 0.0%      | 0.0%       | 0.0%        | 0.4%       | 0.0%      | 0.0%      | 0.0%       | 0.0%        | 0.3%      |
|                   | 0.0%-0.0%   | 0.0%-2.7% | 0.0%-0.8% | 0.0%-0.0%   | 0.0%-1.6% | 0.0%-0.0% | 0.0%-0.0%  | 0.0%-0.0%   | 0.0%-1.0%  | 0.0%-0.0% | 0.0%-0.0% | 0.0%-0.0%  | 0.0%-0.0%   | 0.1%-0.4% |
| Pfubp1-Met3223Ile | 0/48        | 0/90      | 16/435    | 0/15        | 0/161     | 0/92      | 0/167      | 0/75        | 0/242      | 0/36      | 0/236     | 1/45       | 0/37        | 17/1679   |
|                   | 0.0%        | 0.0%      | 3.7%      | 0.0%        | 0.0%      | 0.0%      | 0.0%       | 0.0%        | 0.0%       | 0.0%      | 0.0%      | 2.2%       | 0.0%        | 1.0%      |
|                   | 0.0%-0.0%   | 0.0%-0.0% | 2.2%-5.2% | 0.0%-0.0%   | 0.0%-0.0% | 0.0%-0.0% | 0.0%-0.0%  | 0.0%-0.0%   | 0.0%-0.0%  | 0.0%-0.0% | 0.0%-0.0% | 0.0%-5.8%  | 0.0%-0.0%   | 0.6%-1.4% |
| Pfubp1-Met967Ile  | no coverage | 0/16      | 3/119     | no coverage | 0/28      | 0/5       | 1/73       | no coverage | 2/26       | 0/3       | 0/5       | 0/1        | no coverage | 6/276     |
|                   | no coverage | 0.0%      | 2.5%      | no coverage | 0.0%      | 0.0%      | 1.4%       | no coverage | 7.7%       | 0.0%      | 0.0%      | 0.0%       | no coverage | 2.2%      |
|                   | no coverage | 0.0%-0.0% | 0.2%-4.9% | no coverage | 0.0%-0.0% | 0.0%-0.0% | 0.0%-3.6%  | no coverage | 0.0%-16.3% | 0.0%-0.0% | 0.0%-0.0% | 0.0%-0.0%  | no coverage | 0.7%-3.6% |
| Pfubp1-Phe1407Leu | 0/12        | 0/64      | 2/213     | 0/1         | 1/109     | 1/52      | 0/111      | 0/44        | 0/90       | 0/17      | 0/71      | 0/14       | 0/11        | 4/809     |
|                   | 0.0%        | 0.0%      | 0.9%      | 0.0%        | 0.9%      | 1.9%      | 0.0%       | 0.0%        | 0.0%       | 0.0%      | 0.0%      | 0.0%       | 0.0%        | 0.5%      |
|                   | 0.0%-0.0%   | 0.0%-0.0% | 0.0%-2.0% | 0.0%-0.0%   | 0.0%-2.4% | 0.0%-5.1% | 0.0%-0.0%  | 0.0%-0.0%   | 0.0%-0.0%  | 0.0%-0.0% | 0.0%-0.0% | 0.0%-0.0%  | 0.0%-0.0%   | 0.1%-0.9% |
| Pfubp1-Phe1739Tyr | 0/37        | 0/77      | 3/340     | 0/11        | 1/147     | 1/71      | 0/146      | 1/64        | 3/199      | 0/30      | 1/168     | 0/29       | 1/28        | 11/1347   |
|                   | 0.0%        | 0.0%      | 0.9%      | 0.0%        | 0.7%      | 1.4%      | 0.0%       | 1.6%        | 1.5%       | 0.0%      | 0.6%      | 0.0%       | 3.6%        | 0.8%      |
|                   | 0.0%-0.0%   | 0.0%-0.0% | 0.0%-1.7% | 0.0%-0.0%   | 0.0%-1.8% | 0.0%-3.7% | 0.0%-0.0%  | 0.0%-4.1%   | 0.1%-2.9%  | 0.0%-0.0% | 0.0%-1.6% | 0.0%-0.0%  | 0.0%-9.3%   | 0.4%-1.2% |
| Pfubp1-Phe2333Leu | 0/4         | 0/66      | 3/244     | 0/1         | 0/121     | 0/56      | 2/118      | 0/10        | 1/124      | 0/22      | 1/85      | 0/18       | 0/5         | 7/874     |
|                   | 0.0%        | 0.0%      | 1.2%      | 0.0%        | 0.0%      | 0.0%      | 1.7%       | 0.0%        | 0.8%       | 0.0%      | 1.2%      | 0.0%       | 0.0%        | 0.8%      |
|                   | 0.0%-0.0%   | 0.0%-0.0% | 0.1%-2.4% | 0.0%-0.0%   | 0.0%-0.0% | 0.0%-0.0% | 0.0%-3.6%  | 0.0%-0.0%   | 0.0%-2.1%  | 0.0%-0.0% | 0.0%-3.1% | 0.0%-0.0%  | 0.0%-0.0%   | 0.3%-1.3% |
| Pfubp1-Phe692Leu  | 2/76        | 0/97      | 0/461     | 0/15        | 0/155     | 0/96      | 0/165      | 1/103       | 4/241      | 0/40      | 0/229     | 0/53       | 0/29        | 7/1760    |
|                   | 2.6%        | 0.0%      | 0.0%      | 0.0%        | 0.0%      | 0.0%      | 0.0%       | 1.0%        | 1.7%       | 0.0%      | 0.0%      | 0.0%       | 0.0%        | 0.4%      |
|                   | 0.0%-5.7%   | 0.0%-0.0% | 0.0%-0.0% | 0.0%-0.0%   | 0.0%-0.0% | 0.0%-0.0% | 0.0%-0.0%  | 0.0%-2.6%   | 0.3%-3.0%  | 0.0%-0.0% | 0.0%-0.0% | 0.0%-0.0%  | 0.0%-0.0%   | 0.2%-0.6% |
| Pfubp1-Pro2903Gln | 0/131       | 2/145     | 2/537     | 0/23        | 0/181     | 0/160     | 0/209      | 1/159       | 0/277      | 0/53      | 0/289     | 0/125      | 0/40        | 5/2329    |
|                   | 0.0%        | 1.4%      | 0.4%      | 0.0%        | 0.0%      | 0.0%      | 0.0%       | 0.6%        | 0.0%       | 0.0%      | 0.0%      | 0.0%       | 0.0%        | 0.2%      |
|                   | 0.0%-0.0%   | 0.0%-3.0% | 0.0%-0.8% | 0.0%-0.0%   | 0.0%-0.0% | 0.0%-0.0% | 0.0%-0.0%  | 0.0%-1.7%   | 0.0%-0.0%  | 0.0%-0.0% | 0.0%-0.0% | 0.0%-0.0%  | 0.0%-0.0%   | 0.1%-0.4% |
| Pfubp1-Pro3131Ser | 0/124       | 0/139     | 0/474     | 0/3         | 0/140     | 0/146     | 0/167      | 15/138      | 0/249      | 0/26      | 0/221     | 0/163      | 0/14        | 15/2004   |
|                   | 0.0%        | 0.0%      | 0.0%      | 0.0%        | 0.0%      | 0.0%      | 0.0%       | 10.9%       | 0.0%       | 0.0%      | 0.0%      | 0.0%       | 0.0%        | 0.7%      |
|                   | 0.0%-0.0%   | 0.0%-0.0% | 0.0%-0.0% | 0.0%-0.0%   | 0.0%-0.0% | 0.0%-0.0% | 0.0%-0.0%  | 6.5%-15.2%  | 0.0%-0.0%  | 0.0%-0.0% | 0.0%-0.0% | 0.0%-0.0%  | 0.0%-0.0%   | 0.4%-1.1% |
| Pfubp1-Pro499Ser  | 0/20        | 1/71      | 1/294     | 0/7         | 1/127     | 1/61      | 0/129      | 0/29        | 0/169      | 0/29      | 0/129     | 0/21       | 0/15        | 4/1101    |
|                   | 0.0%        | 1.4%      | 0.3%      | 0.0%        | 0.8%      | 1.6%      | 0.0%       | 0.0%        | 0.0%       | 0.0%      | 0.0%      | 0.0%       | 0.0%        | 0.4%      |
|                   | 0.0%-0.0%   | 0.0%-3.7% | 0.0%-0.9% | 0.0%-0.0%   | 0.0%-2.1% | 0.0%-4.3% | 0.0%-0.0%  | 0.0%-0.0%   | 0.0%-0.0%  | 0.0%-0.0% | 0.0%-0.0% | 0.0%-0.0%  | 0.0%-0.0%   | 0.1%-0.7% |
| Pfubp1-Ser1103Leu | 0/30        | 0/72      | 7/311     | 0/4         | 0/128     | 0/57      | 2/127      | 0/76        | 0/137      | 0/22      | 1/117     | 0/22       | 0/13        | 10/1116   |
|                   | 0.0%        | 0.0%      | 2.3%      | 0.0%        | 0.0%      | 0.0%      | 1.6%       | 0.0%        | 0.0%       | 0.0%      | 0.9%      | 0.0%       | 0.0%        | 0.9%      |
|                   | 0.0%-0.0%   | 0.0%-0.0% | 0.9%-3.6% | 0.0%-0.0%   | 0.0%-0.0% | 0.0%-0.0% | 0.0%-3.4%  | 0.0%-0.0%   | 0.0%-0.0%  | 0.0%-0.0% | 0.0%-2.3% | 0.0%-0.0%  | 0.0%-0.0%   | 0.4%-1.4% |
| Pfubp1-Ser1105Asn | 0/76        | 0/97      | 2/420     | 0/8         | 0/145     | 0/88      | 1/147      | 0/95        | 0/207      | 0/31      | 0/222     | 0/39       | 0/21        | 3/1596    |
|                   | 0.0%        | 0.0%      | 0.5%      | 0.0%        | 0.0%      | 0.0%      | 0.7%       | 0.0%        | 0.0%       | 0.0%      | 0.0%      | 0.0%       | 0.0%        | 0.2%      |
|                   | 0.0%-0.0%   | 0.0%-0.0% | 0.0%-1.0% | 0.0%-0.0%   | 0.0%-0.0% | 0.0%-0.0% | 0.0%-1.8%  | 0.0%-0.0%   | 0.0%-0.0%  | 0.0%-0.0% | 0.0%-0.0% | 0.0%-0.0%  | 0.0%-0.0%   | 0.0%-0.4% |
| Pfubp1-Ser1121Tyr | 0/25        | 0/61      | 2/334     | no coverage | 0/105     | 0/49      | 1/111      | 0/60        | 2/149      | 0/20      | 0/151     | 1/18       | 0/2         | 6/1085    |
|                   | 0.0%        | 0.0%      | 0.6%      | no coverage | 0.0%      | 0.0%      | 0.9%       | 0.0%        | 1.3%       | 0.0%      | 0.0%      | 5.6%       | 0.0%        | 0.6%      |
|                   | 0.0%-0.0%   | 0.0%-0.0% | 0.0%-1.3% | no coverage | 0.0%-0.0% | 0.0%-0.0% | 0.0%-2.4%  | 0.0%-0.0%   | 0.0%-2.9%  | 0.0%-0.0% | 0.0%-0.0% | 0.0%-14.4% | 0.0%-0.0%   | 0.2%-0.9% |
| Pfubp1-Ser1185Thr | 1/130       | 1/144     | 1/515     | 0/11        | 0/149     | 0/162     | 0/162      | 1/125       | 0/252      | 0/30      | 0/287     | 0/136      | 0/16        | 4/2119    |
|                   | 0.8%        | 0.7%      | 0.2%      | 0.0%        | 0.0%      | 0.0%      | 0.0%       | 0.8%        | 0.0%       | 0.0%      | 0.0%      | 0.0%       | 0.0%        | 0.2%      |
|                   | 0.0%-2.0%   | 0.0%-1.8% | 0.0%-0.5% | 0.0%-0.0%   | 0.0%-0.0% | 0.0%-0.0% | 0.0%-0.0%  | 0.0%-2.1%   | 0.0%-0.0%  | 0.0%-0.0% | 0.0%-0.0% | 0.0%-0.0%  | 0.0%-0.0%   | 0.0%-0.3% |
| Pfubp1-Ser1258Pro | 0/53        | 1/88      | 2/450     | 0/4         | 4/133     | 1/82      | 0/141      | 0/81        | 2/213      | 0/28      | 0/219     | 0/39       | 0/9         | 10/1540   |

|                   |             |               |             |               |             |             |             |             |             |             |             |              |              |             |
|-------------------|-------------|---------------|-------------|---------------|-------------|-------------|-------------|-------------|-------------|-------------|-------------|--------------|--------------|-------------|
|                   | 0.0%        | 1.1%          | 0.4%        | 0.0%          | 3.0%        | 1.2%        | 0.0%        | 0.0%        | 0.9%        | 0.0%        | 0.0%        | 0.0%         | 0.0%         | 0.6%        |
|                   | 0.0%-0.0%   | 0.0%-3.0%     | 0.0%-1.0%   | 0.0%-0.0%     | 0.6%-5.4%   | 0.0%-3.2%   | 0.0%-0.0%   | 0.0%-0.0%   | 0.0%-2.0%   | 0.0%-0.0%   | 0.0%-0.0%   | 0.0%-0.0%    | 0.0%-0.0%    | 0.3%-1.0%   |
| Pfubp1-Ser1258Thr | 0/53        | 6/88          | 3/450       | 0/4           | 6/133       | 1/82        | 3/141       | 0/81        | 2/213       | 0/28        | 2/219       | 2/39         | 0/9          | 25/1540     |
|                   | 0.0%        | 6.8%          | 0.7%        | 0.0%          | 4.5%        | 1.2%        | 2.1%        | 0.0%        | 0.9%        | 0.0%        | 0.9%        | 5.1%         | 0.0%         | 1.6%        |
|                   | 0.0%-0.0%   | 2.4%-11.2%    | 0.0%-1.3%   | 0.0%-0.0%     | 1.6%-7.5%   | 0.0%-3.2%   | 0.1%-4.1%   | 0.0%-0.0%   | 0.0%-2.0%   | 0.0%-0.0%   | 0.0%-2.0%   | 0.0%-10.9%   | 0.0%-0.0%    | 1.1%-2.2%   |
| Pfubp1-Ser1472Tyr | 0/86        | 0/102         | 1/454       | 0/9           | 0/136       | 0/107       | 1/134       | 0/98        | 0/196       | 0/31        | 1/229       | 0/67         | 0/12         | 3/1661      |
|                   | 0.0%        | 0.0%          | 0.2%        | 0.0%          | 0.0%        | 0.0%        | 0.7%        | 0.0%        | 0.0%        | 0.0%        | 0.4%        | 0.0%         | 0.0%         | 0.2%        |
|                   | 0.0%-0.0%   | 0.0%-0.0%     | 0.0%-0.6%   | 0.0%-0.0%     | 0.0%-0.0%   | 0.0%-0.0%   | 0.0%-2.0%   | 0.0%-0.0%   | 0.0%-0.0%   | 0.0%-0.0%   | 0.0%-1.2%   | 0.0%-0.0%    | 0.0%-0.0%    | 0.0%-0.4%   |
| Pfubp1-Ser161Tyr  | 0/192       | 0/194         | 3/561       | 0/18          | 0/181       | 1/207       | 0/229       | 0/185       | 0/294       | 0/41        | 0/352       | 0/211        | 0/40         | 4/2705      |
|                   | 0.0%        | 0.0%          | 0.5%        | 0.0%          | 0.0%        | 0.5%        | 0.0%        | 0.0%        | 0.0%        | 0.0%        | 0.0%        | 0.0%         | 0.0%         | 0.1%        |
|                   | 0.0%-0.0%   | 0.0%-0.0%     | 0.0%-1.0%   | 0.0%-0.0%     | 0.0%-0.0%   | 0.0%-1.3%   | 0.0%-0.0%   | 0.0%-0.0%   | 0.0%-0.0%   | 0.0%-0.0%   | 0.0%-0.0%   | 0.0%-0.0%    | 0.0%-0.0%    | 0.0%-0.3%   |
| Pfubp1-Ser2281Pro | 1/92        | 0/124         | 0/489       | 0/13          | 0/153       | 0/120       | 1/170       | 0/112       | 0/245       | 1/41        | 1/241       | 0/61         | 0/29         | 4/1890      |
|                   | 1.1%        | 0.0%          | 0.0%        | 0.0%          | 0.0%        | 0.0%        | 0.6%        | 0.0%        | 0.0%        | 2.4%        | 0.4%        | 0.0%         | 0.0%         | 0.2%        |
|                   | 0.0%-2.9%   | 0.0%-0.0%     | 0.0%-0.0%   | 0.0%-0.0%     | 0.0%-0.0%   | 0.0%-0.0%   | 0.0%-1.6%   | 0.0%-0.0%   | 0.0%-0.0%   | 0.0%-6.4%   | 0.0%-1.1%   | 0.0%-0.0%    | 0.0%-0.0%    | 0.0%-0.4%   |
| Pfubp1-Ser2635Cys | 0/5         | 0/70          | 2/284       | 0/8           | 0/128       | 0/56        | 0/129       | 0/14        | 0/157       | 0/28        | 3/109       | 0/23         | 0/13         | 5/1024      |
|                   | 0.0%        | 0.0%          | 0.7%        | 0.0%          | 0.0%        | 0.0%        | 0.0%        | 0.0%        | 0.0%        | 0.0%        | 2.8%        | 0.0%         | 0.0%         | 0.5%        |
|                   | 0.0%-0.0%   | 0.0%-0.0%     | 0.0%-1.5%   | 0.0%-0.0%     | 0.0%-0.0%   | 0.0%-0.0%   | 0.0%-0.0%   | 0.0%-0.0%   | 0.0%-0.0%   | 0.0%-0.0%   | 0.2%-5.3%   | 0.0%-0.0%    | 0.0%-0.0%    | 0.1%-0.8%   |
| Pfubp1-Ser2729Pro | 0/36        | 0/76          | 5/319       | 0/16          | 0/142       | 0/67        | 0/139       | 0/58        | 0/169       | 0/27        | 0/144       | 0/26         | 0/27         | 5/1246      |
|                   | 0.0%        | 0.0%          | 1.6%        | 0.0%          | 0.0%        | 0.0%        | 0.0%        | 0.0%        | 0.0%        | 0.0%        | 0.0%        | 0.0%         | 0.0%         | 0.4%        |
|                   | 0.0%-0.0%   | 0.0%-0.0%     | 0.4%-2.7%   | 0.0%-0.0%     | 0.0%-0.0%   | 0.0%-0.0%   | 0.0%-0.0%   | 0.0%-0.0%   | 0.0%-0.0%   | 0.0%-0.0%   | 0.0%-0.0%   | 0.0%-0.0%    | 0.0%-0.0%    | 0.1%-0.7%   |
| Pfubp1-Ser281Ala  | 15/19       | 40/58         | 180/254     | 3/3           | 65/109      | 27/48       | 93/117      | 7/22        | 74/137      | 19/31       | 48/100      | 10/12        | 5/5          | 586/915     |
|                   | 78.9%       | 69.0%         | 70.9%       | 100.0%        | 59.6%       | 56.2%       | 79.5%       | 31.8%       | 54.0%       | 61.3%       | 48.0%       | 83.3%        | 100.0%       | 64.0%       |
|                   | 63.6%-94.3% | 59.0%-79.0%   | 66.2%-75.6% | 100.0%-100.0% | 51.9%-67.4% | 44.5%-68.0% | 73.3%-85.6% | 15.5%-48.2% | 47.0%-61.0% | 46.9%-75.7% | 39.8%-56.2% | 65.6%-100.0% | 00.0%-100.0% | 61.4%-66.7% |
| Pfubp1-Ser281Thr  | 1/19        | 0/58          | 3/254       | 0/3           | 0/109       | 0/48        | 0/117       | 1/22        | 2/137       | 0/31        | 0/100       | 0/12         | 0/5          | 7/915       |
|                   | 5.3%        | 0.0%          | 1.2%        | 0.0%          | 0.0%        | 0.0%        | 0.0%        | 4.5%        | 1.5%        | 0.0%        | 0.0%        | 0.0%         | 0.0%         | 0.8%        |
|                   | 0.0%-13.7%  | 0.0%-0.0%     | 0.1%-2.3%   | 0.0%-0.0%     | 0.0%-0.0%   | 0.0%-0.0%   | 0.0%-0.0%   | 0.0%-11.9%  | 0.0%-3.1%   | 0.0%-0.0%   | 0.0%-0.0%   | 0.0%-0.0%    | 0.0%-0.0%    | 0.3%-1.2%   |
| Pfubp1-Ser286Arg  | 0/19        | 0/58          | 2/254       | 0/3           | 0/109       | 0/48        | 1/118       | 0/22        | 0/137       | 0/31        | 0/101       | 0/12         | 0/5          | 3/917       |
|                   | 0.0%        | 0.0%          | 0.8%        | 0.0%          | 0.0%        | 0.0%        | 0.8%        | 0.0%        | 0.0%        | 0.0%        | 0.0%        | 0.0%         | 0.0%         | 0.3%        |
|                   | 0.0%-0.0%   | 0.0%-0.0%     | 0.0%-1.7%   | 0.0%-0.0%     | 0.0%-0.0%   | 0.0%-0.0%   | 0.0%-2.2%   | 0.0%-0.0%   | 0.0%-0.0%   | 0.0%-0.0%   | 0.0%-0.0%   | 0.0%-0.0%    | 0.0%-0.0%    | 0.0%-0.6%   |
| Pfubp1-Ser286Ile  | 1/19        | 0/58          | 3/254       | 0/3           | 0/109       | 0/48        | 1/118       | 0/22        | 1/137       | 0/31        | 0/101       | 0/12         | 0/5          | 6/917       |
|                   | 5.3%        | 0.0%          | 1.2%        | 0.0%          | 0.0%        | 0.0%        | 0.8%        | 0.0%        | 0.7%        | 0.0%        | 0.0%        | 0.0%         | 0.0%         | 0.7%        |
|                   | 0.0%-13.7%  | 0.0%-0.0%     | 0.1%-2.3%   | 0.0%-0.0%     | 0.0%-0.0%   | 0.0%-0.0%   | 0.0%-2.2%   | 0.0%-0.0%   | 0.0%-1.9%   | 0.0%-0.0%   | 0.0%-0.0%   | 0.0%-0.0%    | 0.0%-0.0%    | 0.2%-1.1%   |
| Pfubp1-Ser2946Cys | 14/170      | 1/165         | 9/575       | 0/24          | 4/189       | 1/176       | 1/224       | 5/188       | 10/299      | 0/52        | 3/327       | 2/162        | 0/44         | 50/2595     |
|                   | 8.2%        | 0.6%          | 1.6%        | 0.0%          | 2.1%        | 0.6%        | 0.4%        | 2.7%        | 3.3%        | 0.0%        | 0.9%        | 1.2%         | 0.0%         | 1.9%        |
|                   | 4.8%-11.7%  | 0.0%-1.6%     | 0.7%-2.4%   | 0.0%-0.0%     | 0.4%-3.8%   | 0.0%-1.5%   | 0.0%-1.2%   | 0.7%-4.6%   | 1.6%-5.1%   | 0.0%-0.0%   | 0.1%-1.8%   | 0.0%-2.7%    | 0.0%-0.0%    | 1.5%-2.4%   |
| Pfubp1-Ser3121Asn | 8/140       | 8/148         | 33/484      | 0/3           | 11/146      | 12/167      | 14/175      | 13/152      | 30/261      | 0/27        | 6/238       | 10/187       | 0/14         | 145/2142    |
|                   | 5.7%        | 5.4%          | 6.8%        | 0.0%          | 7.5%        | 7.2%        | 8.0%        | 8.6%        | 11.5%       | 0.0%        | 2.5%        | 5.3%         | 0.0%         | 6.8%        |
|                   | 2.5%-8.9%   | 2.3%-8.5%     | 4.9%-8.7%   | 0.0%-0.0%     | 3.9%-11.1%  | 3.9%-10.5%  | 4.6%-11.4%  | 4.8%-12.3%  | 8.2%-14.7%  | 0.0%-0.0%   | 0.8%-4.2%   | 2.6%-8.1%    | 0.0%-0.0%    | 5.9%-7.7%   |
| Pfubp1-Ser389Asn  | no coverage | 3/3           | 3/5         | no coverage   | 1/2         | 0/2         | 0/1         | 0/3         | 2/4         | no coverage | 0/3         | 3/4          | 0/1          | 12/28       |
|                   | no coverage | 100.0%        | 60.0%       | no coverage   | 50.0%       | 0.0%        | 0.0%        | 0.0%        | 50.0%       | no coverage | 0.0%        | 75.0%        | 0.0%         | 42.9%       |
|                   | no coverage | 100.0%-100.0% | 24.0%-96.0% | no coverage   | 0.0%-100.0% | 0.0%-0.0%   | 0.0%-0.0%   | 0.0%-0.0%   | 8.9%-91.1%  | no coverage | 0.0%-0.0%   | 39.4%-100.0% | 0.0%-0.0%    | 27.5%-58.2% |
| Pfubp1-Ser806Arg  | 0/187       | 0/177         | 0/503       | 0/15          | 0/145       | 0/189       | 1/208       | 3/215       | 0/247       | 0/30        | 1/300       | 2/269        | 0/18         | 7/2503      |
|                   | 0.0%        | 0.0%          | 0.0%        | 0.0%          | 0.0%        | 0.0%        | 0.5%        | 1.4%        | 0.0%        | 0.0%        | 0.3%        | 0.7%         | 0.0%         | 0.3%        |
|                   | 0.0%-0.0%   | 0.0%-0.0%     | 0.0%-0.0%   | 0.0%-0.0%     | 0.0%-0.0%   | 0.0%-0.0%   | 0.0%-1.3%   | 0.1%-2.7%   | 0.0%-0.0%   | 0.0%-0.0%   | 0.0%-0.9%   | 0.0%-1.6%    | 0.0%-0.0%    | 0.1%-0.5%   |

|                   |             |           |           |             |           |           |           |             |            |            |           |           |            |           |
|-------------------|-------------|-----------|-----------|-------------|-----------|-----------|-----------|-------------|------------|------------|-----------|-----------|------------|-----------|
| Pfubp1-Ser806Asn  | 0/187       | 0/177     | 1/503     | 0/15        | 0/145     | 0/189     | 0/208     | 0/215       | 3/247      | 0/30       | 2/300     | 0/269     | 0/18       | 6/2503    |
|                   | 0.0%        | 0.0%      | 0.2%      | 0.0%        | 0.0%      | 0.0%      | 0.0%      | 0.0%        | 1.2%       | 0.0%       | 0.7%      | 0.0%      | 0.0%       | 0.2%      |
|                   | 0.0%-0.0%   | 0.0%-0.0% | 0.0%-0.5% | 0.0%-0.0%   | 0.0%-0.0% | 0.0%-0.0% | 0.0%-0.0% | 0.0%-0.0%   | 0.0%-0.0%  | 0.1%-2.4%  | 0.0%-0.0% | 0.0%-1.4% | 0.0%-0.0%  | 0.0%-0.0% |
| Pfubp1-Thr1500Ala | 0/154       | 0/166     | 0/509     | 0/14        | 1/171     | 1/178     | 0/192     | 1/157       | 0/244      | 0/35       | 0/255     | 0/167     | 0/28       | 3/2270    |
|                   | 0.0%        | 0.0%      | 0.0%      | 0.0%        | 0.6%      | 0.6%      | 0.0%      | 0.6%        | 0.0%       | 0.0%       | 0.0%      | 0.0%      | 0.0%       | 0.1%      |
|                   | 0.0%-0.0%   | 0.0%-0.0% | 0.0%-0.0% | 0.0%-0.0%   | 0.0%-1.5% | 0.0%-1.5% | 0.0%-0.0% | 0.0%-1.7%   | 0.0%-0.0%  | 0.0%-0.0%  | 0.0%-0.0% | 0.0%-0.0% | 0.0%-0.0%  | 0.0%-0.3% |
| Pfubp1-Thr160Lys  | 0/192       | 0/194     | 7/561     | 0/18        | 0/181     | 0/207     | 6/229     | 0/185       | 1/294      | 0/41       | 0/352     | 0/211     | 0/40       | 14/2705   |
|                   | 0.0%        | 0.0%      | 1.2%      | 0.0%        | 0.0%      | 0.0%      | 2.6%      | 0.0%        | 0.3%       | 0.0%       | 0.0%      | 0.0%      | 0.0%       | 0.5%      |
|                   | 0.0%-0.0%   | 0.0%-0.0% | 0.5%-2.0% | 0.0%-0.0%   | 0.0%-0.0% | 0.0%-0.0% | 0.9%-4.4% | 0.0%-0.0%   | 0.0%-0.9%  | 0.0%-0.0%  | 0.0%-0.0% | 0.0%-0.0% | 0.0%-0.0%  | 0.3%-0.7% |
| Pfubp1-Thr1612Ala | 0/3         | 0/65      | 2/222     | 0/1         | 0/111     | 0/51      | 0/115     | 0/29        | 0/80       | 0/10       | 0/61      | 0/18      | 1/9        | 3/775     |
|                   | 0.0%        | 0.0%      | 0.9%      | 0.0%        | 0.0%      | 0.0%      | 0.0%      | 0.0%        | 0.0%       | 0.0%       | 0.0%      | 0.0%      | 11.1%      | 0.4%      |
|                   | 0.0%-0.0%   | 0.0%-0.0% | 0.0%-1.9% | 0.0%-0.0%   | 0.0%-0.0% | 0.0%-0.0% | 0.0%-0.0% | 0.0%-0.0%   | 0.0%-0.0%  | 0.0%-0.0%  | 0.0%-0.0% | 0.0%-0.0% | 0.0%-28.3% | 0.0%-0.8% |
| Pfubp1-Thr1675Ala | 0/114       | 0/122     | 7/488     | 0/10        | 0/163     | 0/130     | 0/169     | 0/109       | 0/233      | 0/35       | 0/277     | 0/114     | 0/22       | 7/1986    |
|                   | 0.0%        | 0.0%      | 1.4%      | 0.0%        | 0.0%      | 0.0%      | 0.0%      | 0.0%        | 0.0%       | 0.0%       | 0.0%      | 0.0%      | 0.0%       | 0.4%      |
|                   | 0.0%-0.0%   | 0.0%-0.0% | 0.5%-2.3% | 0.0%-0.0%   | 0.0%-0.0% | 0.0%-0.0% | 0.0%-0.0% | 0.0%-0.0%   | 0.0%-0.0%  | 0.0%-0.0%  | 0.0%-0.0% | 0.0%-0.0% | 0.0%-0.0%  | 0.1%-0.6% |
| Pfubp1-Thr2369Ala | 0/19        | 0/77      | 0/331     | 0/7         | 0/146     | 0/68      | 0/137     | 0/28        | 3/196      | 0/37       | 0/153     | 0/22      | 0/13       | 3/1234    |
|                   | 0.0%        | 0.0%      | 0.0%      | 0.0%        | 0.0%      | 0.0%      | 0.0%      | 0.0%        | 1.5%       | 0.0%       | 0.0%      | 0.0%      | 0.0%       | 0.2%      |
|                   | 0.0%-0.0%   | 0.0%-0.0% | 0.0%-0.0% | 0.0%-0.0%   | 0.0%-0.0% | 0.0%-0.0% | 0.0%-0.0% | 0.0%-0.0%   | 0.1%-3.0%  | 0.0%-0.0%  | 0.0%-0.0% | 0.0%-0.0% | 0.0%-0.0%  | 0.0%-0.5% |
| Pfubp1-Thr275Lys  | 7/19        | 0/58      | 11/254    | 0/3         | 1/109     | 0/48      | 2/117     | 8/22        | 13/137     | 2/31       | 2/100     | 0/12      | 0/5        | 46/915    |
|                   | 36.8%       | 0.0%      | 4.3%      | 0.0%        | 0.9%      | 0.0%      | 1.7%      | 36.4%       | 9.5%       | 6.5%       | 2.0%      | 0.0%      | 0.0%       | 5.0%      |
|                   | 18.6%-55.0% | 0.0%-0.0% | 2.2%-6.4% | 0.0%-0.0%   | 0.0%-2.4% | 0.0%-0.0% | 0.0%-3.7% | 19.5%-53.2% | 5.4%-13.6% | 0.0%-13.7% | 0.0%-4.3% | 0.0%-0.0% | 0.0%-0.0%  | 3.8%-6.2% |
| Pfubp1-Thr278Lys  | 1/19        | 0/58      | 3/254     | 0/3         | 0/109     | 0/48      | 0/117     | 2/22        | 5/137      | 0/31       | 0/100     | 0/12      | 0/5        | 11/915    |
|                   | 5.3%        | 0.0%      | 1.2%      | 0.0%        | 0.0%      | 0.0%      | 0.0%      | 9.1%        | 3.6%       | 0.0%       | 0.0%      | 0.0%      | 0.0%       | 1.2%      |
|                   | 0.0%-13.7%  | 0.0%-0.0% | 0.1%-2.3% | 0.0%-0.0%   | 0.0%-0.0% | 0.0%-0.0% | 0.0%-0.0% | 0.0%-19.2%  | 1.0%-6.3%  | 0.0%-0.0%  | 0.0%-0.0% | 0.0%-0.0% | 0.0%-0.0%  | 0.6%-1.8% |
| Pfubp1-Thr3018Lys | 0/150       | 0/186     | 0/576     | 0/21        | 0/186     | 0/178     | 0/215     | 0/148       | 3/292      | 0/46       | 0/345     | 0/162     | 0/35       | 3/2540    |
|                   | 0.0%        | 0.0%      | 0.0%      | 0.0%        | 0.0%      | 0.0%      | 0.0%      | 0.0%        | 1.0%       | 0.0%       | 0.0%      | 0.0%      | 0.0%       | 0.1%      |
|                   | 0.0%-0.0%   | 0.0%-0.0% | 0.0%-0.0% | 0.0%-0.0%   | 0.0%-0.0% | 0.0%-0.0% | 0.0%-0.0% | 0.0%-0.0%   | 0.1%-2.0%  | 0.0%-0.0%  | 0.0%-0.0% | 0.0%-0.0% | 0.0%-0.0%  | 0.0%-0.2% |
| Pfubp1-Thr3212Met | 0/48        | 0/90      | 7/435     | 0/15        | 0/161     | 0/92      | 0/167     | 0/75        | 0/242      | 1/36       | 0/236     | 0/45      | 0/37       | 8/1679    |
|                   | 0.0%        | 0.0%      | 1.6%      | 0.0%        | 0.0%      | 0.0%      | 0.0%      | 0.0%        | 0.0%       | 2.8%       | 0.0%      | 0.0%      | 0.0%       | 0.5%      |
|                   | 0.0%-0.0%   | 0.0%-0.0% | 0.6%-2.6% | 0.0%-0.0%   | 0.0%-0.0% | 0.0%-0.0% | 0.0%-0.0% | 0.0%-0.0%   | 0.0%-0.0%  | 0.0%-7.3%  | 0.0%-0.0% | 0.0%-0.0% | 0.0%-0.0%  | 0.2%-0.8% |
| Pfubp1-Thr444Lys  | no coverage | 0/54      | 0/202     | no coverage | 0/90      | 0/32      | 3/103     | 0/3         | 1/76       | 1/18       | 0/64      | 0/13      | 0/1        | 5/656     |
|                   | no coverage | 0.0%      | 0.0%      | no coverage | 0.0%      | 0.0%      | 2.9%      | 0.0%        | 1.3%       | 5.6%       | 0.0%      | 0.0%      | 0.0%       | 0.8%      |
|                   | no coverage | 0.0%-0.0% | 0.0%-0.0% | no coverage | 0.0%-0.0% | 0.0%-0.0% | 0.2%-5.6% | 0.0%-0.0%   | 0.0%-3.5%  | 0.0%-14.4% | 0.0%-0.0% | 0.0%-0.0% | 0.0%-0.0%  | 0.2%-1.3% |
| Pfubp1-Thr870Lys  | 0/34        | 0/70      | 3/323     | 0/3         | 0/130     | 0/56      | 0/121     | 0/68        | 0/161      | 0/26       | 0/159     | 0/24      | 0/11       | 3/1186    |
|                   | 0.0%        | 0.0%      | 0.9%      | 0.0%        | 0.0%      | 0.0%      | 0.0%      | 0.0%        | 0.0%       | 0.0%       | 0.0%      | 0.0%      | 0.0%       | 0.3%      |
|                   | 0.0%-0.0%   | 0.0%-0.0% | 0.1%-1.8% | 0.0%-0.0%   | 0.0%-0.0% | 0.0%-0.0% | 0.0%-0.0% | 0.0%-0.0%   | 0.0%-0.0%  | 0.0%-0.0%  | 0.0%-0.0% | 0.0%-0.0% | 0.0%-0.0%  | 0.0%-0.5% |
| Pfubp1-Tyr1462His | 1/86        | 0/102     | 13/455    | 0/9         | 0/136     | 3/107     | 3/134     | 0/98        | 3/196      | 0/31       | 5/229     | 1/67      | 0/12       | 29/1662   |
|                   | 1.2%        | 0.0%      | 2.9%      | 0.0%        | 0.0%      | 2.8%      | 2.2%      | 0.0%        | 1.5%       | 0.0%       | 2.2%      | 1.5%      | 0.0%       | 1.7%      |
|                   | 0.0%-3.1%   | 0.0%-0.0% | 1.6%-4.1% | 0.0%-0.0%   | 0.0%-0.0% | 0.2%-5.4% | 0.1%-4.3% | 0.0%-0.0%   | 0.1%-3.0%  | 0.0%-0.0%  | 0.6%-3.8% | 0.0%-3.9% | 0.0%-0.0%  | 1.2%-2.3% |
| Pfubp1-Tyr1549Cys | 0/44        | 0/84      | 0/297     | 0/6         | 0/114     | 0/63      | 0/116     | 0/70        | 0/121      | 2/18       | 1/138     | 0/29      | 0/7        | 3/1107    |
|                   | 0.0%        | 0.0%      | 0.0%      | 0.0%        | 0.0%      | 0.0%      | 0.0%      | 0.0%        | 0.0%       | 11.1%      | 0.7%      | 0.0%      | 0.0%       | 0.3%      |
|                   | 0.0%-0.0%   | 0.0%-0.0% | 0.0%-0.0% | 0.0%-0.0%   | 0.0%-0.0% | 0.0%-0.0% | 0.0%-0.0% | 0.0%-0.0%   | 0.0%-0.0%  | 0.0%-23.3% | 0.0%-1.9% | 0.0%-0.0% | 0.0%-0.0%  | 0.0%-0.5% |
| Pfubp1-Tyr1556Cys | 0/46        | 0/90      | 6/336     | 0/8         | 1/133     | 1/72      | 2/131     | 1/77        | 0/140      | 0/21       | 1/168     | 0/34      | 0/14       | 12/1270   |
|                   | 0.0%        | 0.0%      | 1.8%      | 0.0%        | 0.8%      | 1.4%      | 1.5%      | 1.3%        | 0.0%       | 0.0%       | 0.6%      | 0.0%      | 0.0%       | 0.9%      |

|                   |               |               |               |             |               |               |               |               |              |               |               |               |               |              |
|-------------------|---------------|---------------|---------------|-------------|---------------|---------------|---------------|---------------|--------------|---------------|---------------|---------------|---------------|--------------|
|                   | 0.0%-0.0%     | 0.0%-0.0%     | 0.6%-3.0%     | 0.0%-0.0%   | 0.0%-2.0%     | 0.0%-3.7%     | 0.0%-3.3%     | 0.0%-3.4%     | 0.0%-0.0%    | 0.0%-0.0%     | 0.0%-1.6%     | 0.0%-0.0%     | 0.0%-0.0%     | 0.5%-1.4%    |
| Pfubp1-Tyr1896Asp | 0/243         | 2/273         | 0/622         | 0/34        | 0/227         | 0/277         | 0/337         | 0/291         | 1/330        | 0/59          | 0/390         | 0/388         | 0/63          | 3/3534       |
|                   | 0.0%          | 0.7%          | 0.0%          | 0.0%        | 0.0%          | 0.0%          | 0.0%          | 0.0%          | 0.3%         | 0.0%          | 0.0%          | 0.0%          | 0.0%          | 0.1%         |
|                   | 0.0%-0.0%     | 0.0%-1.6%     | 0.0%-0.0%     | 0.0%-0.0%   | 0.0%-0.0%     | 0.0%-0.0%     | 0.0%-0.0%     | 0.0%-0.0%     | 0.0%-0.8%    | 0.0%-0.0%     | 0.0%-0.0%     | 0.0%-0.0%     | 0.0%-0.0%     | 0.0%-0.2%    |
| Pfubp1-Tyr1969Asp | 0/88          | 1/112         | 2/472         | 0/8         | 0/87          | 0/102         | 0/144         | 0/92          | 0/212        | 0/29          | 0/241         | 1/86          | 0/11          | 4/1684       |
|                   | 0.0%          | 0.9%          | 0.4%          | 0.0%        | 0.0%          | 0.0%          | 0.0%          | 0.0%          | 0.0%         | 0.0%          | 0.0%          | 1.2%          | 0.0%          | 0.2%         |
|                   | 0.0%-0.0%     | 0.0%-2.4%     | 0.0%-0.9%     | 0.0%-0.0%   | 0.0%-0.0%     | 0.0%-0.0%     | 0.0%-0.0%     | 0.0%-0.0%     | 0.0%-0.0%    | 0.0%-0.0%     | 0.0%-0.0%     | 0.0%-3.1%     | 0.0%-0.0%     | 0.0%-0.4%    |
| Pfubp1-Tyr279Asn  | 1/19          | 0/58          | 1/254         | 0/3         | 0/109         | 0/48          | 0/117         | 0/22          | 1/137        | 0/31          | 1/100         | 0/12          | 0/5           | 4/915        |
|                   | 5.3%          | 0.0%          | 0.4%          | 0.0%        | 0.0%          | 0.0%          | 0.0%          | 0.0%          | 0.7%         | 0.0%          | 1.0%          | 0.0%          | 0.0%          | 0.4%         |
|                   | 0.0%-13.7%    | 0.0%-0.0%     | 0.0%-1.0%     | 0.0%-0.0%   | 0.0%-0.0%     | 0.0%-0.0%     | 0.0%-0.0%     | 0.0%-0.0%     | 0.0%-1.9%    | 0.0%-0.0%     | 0.0%-2.6%     | 0.0%-0.0%     | 0.0%-0.0%     | 0.1%-0.8%    |
| Pfubp1-Tyr279His  | 0/19          | 0/58          | 0/254         | 0/3         | 0/109         | 0/48          | 4/117         | 0/22          | 3/137        | 0/31          | 0/100         | 0/12          | 0/5           | 7/915        |
|                   | 0.0%          | 0.0%          | 0.0%          | 0.0%        | 0.0%          | 0.0%          | 3.4%          | 0.0%          | 2.2%         | 0.0%          | 0.0%          | 0.0%          | 0.0%          | 0.8%         |
|                   | 0.0%-0.0%     | 0.0%-0.0%     | 0.0%-0.0%     | 0.0%-0.0%   | 0.0%-0.0%     | 0.0%-0.0%     | 0.7%-6.2%     | 0.0%-0.0%     | 0.1%-4.2%    | 0.0%-0.0%     | 0.0%-0.0%     | 0.0%-0.0%     | 0.0%-0.0%     | 0.3%-1.2%    |
| Pfubp1-Tyr279Ser  | 0/19          | 1/58          | 2/254         | 0/3         | 1/109         | 0/48          | 0/117         | 0/22          | 2/137        | 0/31          | 1/100         | 0/12          | 0/5           | 7/915        |
|                   | 0.0%          | 1.7%          | 0.8%          | 0.0%        | 0.9%          | 0.0%          | 0.0%          | 0.0%          | 1.5%         | 0.0%          | 1.0%          | 0.0%          | 0.0%          | 0.8%         |
|                   | 0.0%-0.0%     | 0.0%-4.5%     | 0.0%-1.7%     | 0.0%-0.0%   | 0.0%-2.4%     | 0.0%-0.0%     | 0.0%-0.0%     | 0.0%-0.0%     | 0.0%-3.1%    | 0.0%-0.0%     | 0.0%-2.6%     | 0.0%-0.0%     | 0.0%-0.0%     | 0.3%-1.2%    |
| Pfubp1-Tyr2822Cys | 7/167         | 4/165         | 33/558        | 3/19        | 7/179         | 7/183         | 16/215        | 8/169         | 6/271        | 3/49          | 11/285        | 5/181         | 2/38          | 112/2479     |
|                   | 4.2%          | 2.4%          | 5.9%          | 15.8%       | 3.9%          | 3.8%          | 7.4%          | 4.7%          | 2.2%         | 6.1%          | 3.9%          | 2.8%          | 5.3%          | 4.5%         |
|                   | 1.6%-6.7%     | 0.5%-4.4%     | 4.3%-7.6%     | 2.0%-29.5%  | 1.5%-6.3%     | 1.5%-6.2%     | 4.5%-10.4%    | 2.0%-7.4%     | 0.7%-3.7%    | 0.5%-11.8%    | 2.0%-5.7%     | 0.8%-4.8%     | 0.0%-11.2%    | 3.8%-5.2%    |
| Pfubp1-Tyr3045Cys | 0/150         | 1/186         | 1/576         | 0/21        | 0/186         | 0/178         | 0/215         | 0/148         | 0/292        | 0/46          | 0/345         | 1/162         | 0/35          | 3/2540       |
|                   | 0.0%          | 0.5%          | 0.2%          | 0.0%        | 0.0%          | 0.0%          | 0.0%          | 0.0%          | 0.0%         | 0.0%          | 0.0%          | 0.6%          | 0.0%          | 0.1%         |
|                   | 0.0%-0.0%     | 0.0%-1.4%     | 0.0%-0.5%     | 0.0%-0.0%   | 0.0%-0.0%     | 0.0%-0.0%     | 0.0%-0.0%     | 0.0%-0.0%     | 0.0%-0.0%    | 0.0%-0.0%     | 0.0%-0.0%     | 0.0%-1.6%     | 0.0%-0.0%     | 0.0%-0.2%    |
| Pfubp1-Tyr615His  | 4/4           | 63/63         | 230/230       | no coverage | 101/101       | 47/47         | 104/104       | 24/24         | 125/127      | 16/16         | 92/92         | 17/17         | 4/4           | 827/829      |
|                   | 100.0%        | 100.0%        | 100.0%        | no coverage | 100.0%        | 100.0%        | 100.0%        | 100.0%        | 98.4%        | 100.0%        | 100.0%        | 100.0%        | 100.0%        | 99.8%        |
|                   | 100.0%-100.0% | 100.0%-100.0% | 100.0%-100.0% | no coverage | 100.0%-100.0% | 100.0%-100.0% | 100.0%-100.0% | 100.0%-100.0% | 96.6%-100.0% | 100.0%-100.0% | 100.0%-100.0% | 100.0%-100.0% | 100.0%-100.0% | 99.5%-100.0% |
| Pfubp1-Val1285Met | 0/60          | 1/76          | 0/362         | 0/8         | 0/128         | 0/65          | 0/130         | 0/85          | 6/155        | 0/27          | 0/172         | 0/43          | 0/12          | 7/1323       |
|                   | 0.0%          | 1.3%          | 0.0%          | 0.0%        | 0.0%          | 0.0%          | 0.0%          | 0.0%          | 3.9%         | 0.0%          | 0.0%          | 0.0%          | 0.0%          | 0.5%         |
|                   | 0.0%-0.0%     | 0.0%-3.5%     | 0.0%-0.0%     | 0.0%-0.0%   | 0.0%-0.0%     | 0.0%-0.0%     | 0.0%-0.0%     | 0.0%-0.0%     | 1.3%-6.4%    | 0.0%-0.0%     | 0.0%-0.0%     | 0.0%-0.0%     | 0.0%-0.0%     | 0.2%-0.9%    |
| Pfubp1-Val3063Glu | 0/132         | 0/172         | 1/547         | 0/14        | 0/169         | 0/158         | 1/194         | 0/136         | 0/273        | 0/38          | 1/331         | 0/146         | 0/25          | 3/2335       |
|                   | 0.0%          | 0.0%          | 0.2%          | 0.0%        | 0.0%          | 0.0%          | 0.5%          | 0.0%          | 0.0%         | 0.0%          | 0.3%          | 0.0%          | 0.0%          | 0.1%         |
|                   | 0.0%-0.0%     | 0.0%-0.0%     | 0.0%-0.5%     | 0.0%-0.0%   | 0.0%-0.0%     | 0.0%-0.0%     | 0.0%-1.4%     | 0.0%-0.0%     | 0.0%-0.0%    | 0.0%-0.0%     | 0.0%-0.8%     | 0.0%-0.0%     | 0.0%-0.0%     | 0.0%-0.3%    |
| Pfubp1-Val3072Ala | 0/126         | 0/162         | 1/537         | 0/13        | 4/163         | 2/159         | 0/191         | 0/134         | 0/269        | 0/40          | 0/320         | 0/143         | 0/25          | 7/2282       |
|                   | 0.0%          | 0.0%          | 0.2%          | 0.0%        | 2.5%          | 1.3%          | 0.0%          | 0.0%          | 0.0%         | 0.0%          | 0.0%          | 0.0%          | 0.0%          | 0.3%         |
|                   | 0.0%-0.0%     | 0.0%-0.0%     | 0.0%-0.5%     | 0.0%-0.0%   | 0.5%-4.4%     | 0.0%-2.7%     | 0.0%-0.0%     | 0.0%-0.0%     | 0.0%-0.0%    | 0.0%-0.0%     | 0.0%-0.0%     | 0.0%-0.0%     | 0.0%-0.0%     | 0.1%-0.5%    |
| Pfubp1-Val3120Met | 0/138         | 0/148         | 2/480         | 0/3         | 0/145         | 1/166         | 0/168         | 0/147         | 0/256        | 0/26          | 1/238         | 0/182         | 0/14          | 4/2111       |
|                   | 0.0%          | 0.0%          | 0.4%          | 0.0%        | 0.0%          | 0.6%          | 0.0%          | 0.0%          | 0.0%         | 0.0%          | 0.4%          | 0.0%          | 0.0%          | 0.2%         |
|                   | 0.0%-0.0%     | 0.0%-0.0%     | 0.0%-0.9%     | 0.0%-0.0%   | 0.0%-0.0%     | 0.0%-1.6%     | 0.0%-0.0%     | 0.0%-0.0%     | 0.0%-0.0%    | 0.0%-0.0%     | 0.0%-1.1%     | 0.0%-0.0%     | 0.0%-0.0%     | 0.0%-0.3%    |
| Pfubp1-Val531Ile  | 0/29          | 0/51          | 0/295         | no coverage | 0/82          | 0/35          | 0/111         | 1/60          | 2/125        | 0/22          | 0/125         | 0/14          | 0/2           | 3/951        |
|                   | 0.0%          | 0.0%          | 0.0%          | no coverage | 0.0%          | 0.0%          | 0.0%          | 1.7%          | 1.6%         | 0.0%          | 0.0%          | 0.0%          | 0.0%          | 0.3%         |
|                   | 0.0%-0.0%     | 0.0%-0.0%     | 0.0%-0.0%     | no coverage | 0.0%-0.0%     | 0.0%-0.0%     | 0.0%-0.0%     | 0.0%-4.4%     | 0.0%-3.4%    | 0.0%-0.0%     | 0.0%-0.0%     | 0.0%-0.0%     | 0.0%-0.0%     | 0.0%-0.6%    |
| Pfubp1-Val627Ile  | 0/4           | 1/63          | 2/230         | no coverage | 0/101         | 0/47          | 0/104         | 1/24          | 1/127        | 0/16          | 1/92          | 2/17          | 0/4           | 8/829        |
|                   | 0.0%          | 1.6%          | 0.9%          | no coverage | 0.0%          | 0.0%          | 0.0%          | 4.2%          | 0.8%         | 0.0%          | 1.1%          | 11.8%         | 0.0%          | 1.0%         |
|                   | 0.0%-0.0%     | 0.0%-4.2%     | 0.0%-1.9%     | no coverage | 0.0%-0.0%     | 0.0%-0.0%     | 0.0%-0.0%     | 0.0%-10.9%    | 0.0%-2.1%    | 0.0%-0.0%     | 0.0%-2.9%     | 0.0%-24.6%    | 0.0%-0.0%     | 0.4%-1.5%    |
| Pfubp1-Val708Ile  | 0/52          | 0/83          | 1/397         | 0/12        | 0/142         | 0/77          | 1/141         | 3/64          | 0/202        | 0/31          | 1/186         | 0/33          | 0/20          | 6/1440       |



|                  |             |            |             |            |            |            |             |            |           |            |             |             |            |             |
|------------------|-------------|------------|-------------|------------|------------|------------|-------------|------------|-----------|------------|-------------|-------------|------------|-------------|
|                  | 0.0%        | 0.0%       | 0.3%        | 0.0%       | 0.0%       | 0.0%       | 0.7%        | 4.7%       | 0.0%      | 0.0%       | 0.5%        | 0.0%        | 0.0%       | 0.4%        |
|                  | 0.0%-0.0%   | 0.0%-0.0%  | 0.0%-0.7%   | 0.0%-0.0%  | 0.0%-0.0%  | 0.0%-0.0%  | 0.0%-1.9%   | 0.3%-9.0%  | 0.0%-0.0% | 0.0%-0.0%  | 0.0%-1.4%   | 0.0%-0.0%   | 0.0%-0.0%  | 0.1%-0.7%   |
| Pfubp1-Val739Met | 0/180       | 0/197      | 0/566       | 0/27       | 0/202      | 0/190      | 0/252       | 0/216      | 2/301     | 0/55       | 1/348       | 0/248       | 0/44       | 3/2826      |
|                  | 0.0%        | 0.0%       | 0.0%        | 0.0%       | 0.0%       | 0.0%       | 0.0%        | 0.0%       | 0.7%      | 0.0%       | 0.3%        | 0.0%        | 0.0%       | 0.1%        |
|                  | 0.0%-0.0%   | 0.0%-0.0%  | 0.0%-0.0%   | 0.0%-0.0%  | 0.0%-0.0%  | 0.0%-0.0%  | 0.0%-0.0%   | 0.0%-0.0%  | 0.0%-1.4% | 0.0%-0.0%  | 0.0%-0.8%   | 0.0%-0.0%   | 0.0%-0.0%  | 0.0%-0.2%   |
| Sec14-Asn615Asp  | 13/59       | 4/94       | 62/422      | 1/15       | 20/163     | 8/89       | 21/170      | 9/85       | 13/228    | 4/45       | 47/214      | 11/46       | 6/39       | 219/1669    |
|                  | 22.0%       | 4.3%       | 14.7%       | 6.7%       | 12.3%      | 9.0%       | 12.4%       | 10.6%      | 5.7%      | 8.9%       | 22.0%       | 23.9%       | 15.4%      | 13.1%       |
|                  | 13.2%-30.9% | 0.8%-7.7%  | 11.9%-17.5% | 0.0%-17.3% | 8.0%-16.5% | 4.0%-14.0% | 8.2%-16.5%  | 5.1%-16.1% | 3.2%-8.2% | 1.9%-15.9% | 17.3%-26.6% | 13.6%-34.3% | 5.9%-24.9% | 11.8%-14.5% |
| Sec14-Cys618Ser  | 3/59        | 0/94       | 0/422       | 0/15       | 0/163      | 0/89       | 0/170       | 0/85       | 0/228     | 0/45       | 0/214       | 0/46        | 0/39       | 3/1669      |
|                  | 5.1%        | 0.0%       | 0.0%        | 0.0%       | 0.0%       | 0.0%       | 0.0%        | 0.0%       | 0.0%      | 0.0%       | 0.0%        | 0.0%        | 0.0%       | 0.2%        |
|                  | 0.4%-9.8%   | 0.0%-0.0%  | 0.0%-0.0%   | 0.0%-0.0%  | 0.0%-0.0%  | 0.0%-0.0%  | 0.0%-0.0%   | 0.0%-0.0%  | 0.0%-0.0% | 0.0%-0.0%  | 0.0%-0.0%   | 0.0%-0.0%   | 0.0%-0.0%  | 0.0%-0.4%   |
| Sec14-His638Gln  | 0/59        | 0/94       | 3/422       | 0/15       | 0/163      | 0/89       | 0/170       | 0/85       | 0/228     | 0/45       | 0/214       | 0/46        | 0/39       | 3/1669      |
|                  | 0.0%        | 0.0%       | 0.7%        | 0.0%       | 0.0%       | 0.0%       | 0.0%        | 0.0%       | 0.0%      | 0.0%       | 0.0%        | 0.0%        | 0.0%       | 0.2%        |
|                  | 0.0%-0.0%   | 0.0%-0.0%  | 0.0%-1.4%   | 0.0%-0.0%  | 0.0%-0.0%  | 0.0%-0.0%  | 0.0%-0.0%   | 0.0%-0.0%  | 0.0%-0.0% | 0.0%-0.0%  | 0.0%-0.0%   | 0.0%-0.0%   | 0.0%-0.0%  | 0.0%-0.4%   |
| crt-Ala220Ser    | 0/8         | 1/56       | 16/264      | 4/30       | 2/119      | 1/38       | 5/384       | 0/23       | 4/98      | 0/25       | 1/71        | 3/223       | 0/26       | 37/1365     |
|                  | 0.0%        | 1.8%       | 6.1%        | 13.3%      | 1.7%       | 2.6%       | 1.3%        | 0.0%       | 4.1%      | 0.0%       | 1.4%        | 1.3%        | 0.0%       | 2.7%        |
|                  | 0.0%-0.0%   | 0.0%-4.7%  | 3.6%-8.5%   | 3.1%-23.5% | 0.0%-3.6%  | 0.0%-6.9%  | 0.4%-2.3%   | 0.0%-0.0%  | 0.8%-7.4% | 0.0%-0.0%  | 0.0%-3.7%   | 0.1%-2.6%   | 0.0%-0.0%  | 2.0%-3.4%   |
| crt-Ala355Thr    | 0/30        | 0/69       | 3/390       | 0/49       | 0/132      | 0/63       | 1/471       | 0/47       | 0/150     | 0/25       | 0/133       | 0/278       | 0/16       | 4/1853      |
|                  | 0.0%        | 0.0%       | 0.8%        | 0.0%       | 0.0%       | 0.0%       | 0.2%        | 0.0%       | 0.0%      | 0.0%       | 0.0%        | 0.0%        | 0.0%       | 0.2%        |
|                  | 0.0%-0.0%   | 0.0%-0.0%  | 0.0%-1.5%   | 0.0%-0.0%  | 0.0%-0.0%  | 0.0%-0.0%  | 0.0%-0.6%   | 0.0%-0.0%  | 0.0%-0.0% | 0.0%-0.0%  | 0.0%-0.0%   | 0.0%-0.0%   | 0.0%-0.0%  | 0.0%-0.4%   |
| crt-Arg371Ile    | 1/6         | 4/67       | 25/356      | 4/38       | 4/136      | 0/57       | 9/446       | 0/12       | 5/130     | 1/25       | 1/94        | 4/259       | 0/15       | 58/1641     |
|                  | 16.7%       | 6.0%       | 7.0%        | 10.5%      | 2.9%       | 0.0%       | 2.0%        | 0.0%       | 3.8%      | 4.0%       | 1.1%        | 1.5%        | 0.0%       | 3.5%        |
|                  | 0.0%-41.7%  | 1.2%-10.7% | 4.8%-9.3%   | 2.3%-18.7% | 0.6%-5.3%  | 0.0%-0.0%  | 0.9%-3.1%   | 0.0%-0.0%  | 1.1%-6.6% | 0.0%-10.4% | 0.0%-2.8%   | 0.3%-2.8%   | 0.0%-0.0%  | 2.8%-4.3%   |
| crt-Asn326Ser    | 0/9         | 0/81       | 0/404       | 0/58       | 2/157      | 0/69       | 0/483       | 0/25       | 4/169     | 0/33       | 0/137       | 1/293       | 0/22       | 7/1940      |
|                  | 0.0%        | 0.0%       | 0.0%        | 0.0%       | 1.3%       | 0.0%       | 0.0%        | 0.0%       | 2.4%      | 0.0%       | 0.0%        | 0.3%        | 0.0%       | 0.4%        |
|                  | 0.0%-0.0%   | 0.0%-0.0%  | 0.0%-0.0%   | 0.0%-0.0%  | 0.0%-2.7%  | 0.0%-0.0%  | 0.0%-0.0%   | 0.0%-0.0%  | 0.4%-4.3% | 0.0%-0.0%  | 0.0%-0.0%   | 0.0%-0.9%   | 0.0%-0.0%  | 0.1%-0.6%   |
| crt-Asn75Glu     | 0/5         | 1/71       | 27/406      | 6/52       | 3/140      | 0/62       | 2/485       | 0/19       | 6/177     | 0/30       | 0/134       | 2/292       | 0/18       | 47/1891     |
|                  | 0.0%        | 1.4%       | 6.7%        | 11.5%      | 2.1%       | 0.0%       | 0.4%        | 0.0%       | 3.4%      | 0.0%       | 0.0%        | 0.7%        | 0.0%       | 2.5%        |
|                  | 0.0%-0.0%   | 0.0%-3.7%  | 4.6%-8.7%   | 4.3%-18.8% | 0.1%-4.2%  | 0.0%-0.0%  | 0.0%-0.9%   | 0.0%-0.0%  | 1.2%-5.6% | 0.0%-0.0%  | 0.0%-0.0%   | 0.0%-1.5%   | 0.0%-0.0%  | 1.9%-3.1%   |
| crt-Asp24Tyr     | 1/31        | 7/80       | 52/391      | 2/40       | 10/154     | 12/75      | 56/437      | 8/66       | 9/182     | 0/35       | 11/141      | 22/245      | 4/33       | 194/1910    |
|                  | 3.2%        | 8.8%       | 13.3%       | 5.0%       | 6.5%       | 16.0%      | 12.8%       | 12.1%      | 4.9%      | 0.0%       | 7.8%        | 9.0%        | 12.1%      | 10.2%       |
|                  | 0.0%-8.4%   | 3.6%-13.9% | 10.5%-16.1% | 0.0%-10.7% | 3.2%-9.8%  | 9.0%-23.0% | 10.2%-15.4% | 5.5%-18.7% | 2.3%-7.6% | 0.0%-0.0%  | 4.1%-11.5%  | 6.0%-12.0%  | 2.8%-21.5% | 9.0%-11.3%  |
| crt-Gln271Glu    | 0/10        | 1/51       | 16/279      | 4/31       | 4/111      | 0/42       | 4/410       | 0/26       | 4/101     | 0/25       | 0/61        | 4/237       | 0/7        | 37/1391     |
|                  | 0.0%        | 2.0%       | 5.7%        | 12.9%      | 3.6%       | 0.0%       | 1.0%        | 0.0%       | 4.0%      | 0.0%       | 0.0%        | 1.7%        | 0.0%       | 2.7%        |
|                  | 0.0%-0.0%   | 0.0%-5.2%  | 3.4%-8.0%   | 3.0%-22.8% | 0.7%-6.5%  | 0.0%-0.0%  | 0.2%-1.8%   | 0.0%-0.0%  | 0.8%-7.2% | 0.0%-0.0%  | 0.0%-0.0%   | 0.3%-3.1%   | 0.0%-0.0%  | 2.0%-3.4%   |
| crt-Lys76Thr     | 0/5         | 1/71       | 27/406      | 6/52       | 3/140      | 0/62       | 2/485       | 0/19       | 6/177     | 0/30       | 0/134       | 2/292       | 0/18       | 47/1891     |
|                  | 0.0%        | 1.4%       | 6.7%        | 11.5%      | 2.1%       | 0.0%       | 0.4%        | 0.0%       | 3.4%      | 0.0%       | 0.0%        | 0.7%        | 0.0%       | 2.5%        |
|                  | 0.0%-0.0%   | 0.0%-3.7%  | 4.6%-8.7%   | 4.3%-18.8% | 0.1%-4.2%  | 0.0%-0.0%  | 0.0%-0.9%   | 0.0%-0.0%  | 1.2%-5.6% | 0.0%-0.0%  | 0.0%-0.0%   | 0.0%-1.5%   | 0.0%-0.0%  | 1.9%-3.1%   |
| crt-Met74Ile     | 0/5         | 1/71       | 27/406      | 6/52       | 3/140      | 0/62       | 2/485       | 0/19       | 6/177     | 0/30       | 0/134       | 2/292       | 0/18       | 47/1891     |
|                  | 0.0%        | 1.4%       | 6.7%        | 11.5%      | 2.1%       | 0.0%       | 0.4%        | 0.0%       | 3.4%      | 0.0%       | 0.0%        | 0.7%        | 0.0%       | 2.5%        |
|                  | 0.0%-0.0%   | 0.0%-3.7%  | 4.6%-8.7%   | 4.3%-18.8% | 0.1%-4.2%  | 0.0%-0.0%  | 0.0%-0.9%   | 0.0%-0.0%  | 1.2%-5.6% | 0.0%-0.0%  | 0.0%-0.0%   | 0.0%-1.5%   | 0.0%-0.0%  | 1.9%-3.1%   |
| crt-Val141Leu    | 0/101       | 1/124      | 19/563      | 4/50       | 0/137      | 0/131      | 1/482       | 0/107      | 0/203     | 0/25       | 0/223       | 1/346       | 0/15       | 26/2507     |
|                  | 0.0%        | 0.8%       | 3.4%        | 8.0%       | 0.0%       | 0.0%       | 0.2%        | 0.0%       | 0.0%      | 0.0%       | 0.0%        | 0.3%        | 0.0%       | 1.0%        |
|                  | 0.0%-0.0%   | 0.0%-2.1%  | 2.1%-4.6%   | 1.7%-14.3% | 0.0%-0.0%  | 0.0%-0.0%  | 0.0%-0.5%   | 0.0%-0.0%  | 0.0%-0.0% | 0.0%-0.0%  | 0.0%-0.0%   | 0.0%-0.8%   | 0.0%-0.0%  | 0.7%-1.4%   |

|                   |               |               |               |               |               |               |               |               |               |               |               |               |               |               |
|-------------------|---------------|---------------|---------------|---------------|---------------|---------------|---------------|---------------|---------------|---------------|---------------|---------------|---------------|---------------|
| crt-Val418Ala     | no coverage   | 0/16          | 3/162         | 1/29          | 0/39          | 0/7           | 0/352         | no coverage   | 0/20          | 0/5           | 0/6           | 0/206         | 0/1           | 4/843         |
|                   | no coverage   | 0.0%          | 1.9%          | 3.4%          | 0.0%          | 0.0%          | 0.0%          | no coverage   | 0.0%          | 0.0%          | 0.0%          | 0.0%          | 0.0%          | 0.5%          |
|                   | no coverage   | 0.0%-0.0%     | 0.1%-3.6%     | 0.0%-9.0%     | 0.0%-0.0%     | 0.0%-0.0%     | 0.0%-0.0%     | no coverage   | 0.0%-0.0%     | 0.0%-0.0%     | 0.0%-0.0%     | 0.0%-0.0%     | 0.0%-0.0%     | 0.0%-0.0%     |
| cytb-Arg365Gln    | 0/234         | 0/267         | 0/636         | 0/41          | 3/239         | 0/285         | 0/299         | 0/266         | 0/346         | 0/79          | 0/409         | 0/316         | 0/73          | 3/3490        |
|                   | 0.0%          | 0.0%          | 0.0%          | 0.0%          | 1.3%          | 0.0%          | 0.0%          | 0.0%          | 0.0%          | 0.0%          | 0.0%          | 0.0%          | 0.0%          | 0.1%          |
|                   | 0.0%-0.0%     | 0.0%-0.0%     | 0.0%-0.0%     | 0.0%-0.0%     | 0.1%-2.4%     | 0.0%-0.0%     | 0.0%-0.0%     | 0.0%-0.0%     | 0.0%-0.0%     | 0.0%-0.0%     | 0.0%-0.0%     | 0.0%-0.0%     | 0.0%-0.0%     | 0.0%-0.2%     |
| cytb-Cys354Trp    | 0/234         | 0/267         | 2/636         | 0/41          | 1/239         | 0/285         | 0/299         | 0/266         | 0/346         | 0/79          | 0/409         | 0/316         | 0/73          | 3/3490        |
|                   | 0.0%          | 0.0%          | 0.3%          | 0.0%          | 0.4%          | 0.0%          | 0.0%          | 0.0%          | 0.0%          | 0.0%          | 0.0%          | 0.0%          | 0.0%          | 0.1%          |
|                   | 0.0%-0.0%     | 0.0%-0.0%     | 0.0%-0.7%     | 0.0%-0.0%     | 0.0%-1.1%     | 0.0%-0.0%     | 0.0%-0.0%     | 0.0%-0.0%     | 0.0%-0.0%     | 0.0%-0.0%     | 0.0%-0.0%     | 0.0%-0.0%     | 0.0%-0.0%     | 0.0%-0.2%     |
| cytb-His362Gln    | 0/234         | 0/267         | 1/636         | 0/41          | 0/239         | 3/285         | 0/299         | 0/266         | 0/346         | 0/79          | 3/409         | 2/316         | 1/73          | 10/3490       |
|                   | 0.0%          | 0.0%          | 0.2%          | 0.0%          | 0.0%          | 1.1%          | 0.0%          | 0.0%          | 0.0%          | 0.0%          | 0.7%          | 0.6%          | 1.4%          | 0.3%          |
|                   | 0.0%-0.0%     | 0.0%-0.0%     | 0.0%-0.4%     | 0.0%-0.0%     | 0.0%-0.0%     | 0.1%-2.0%     | 0.0%-0.0%     | 0.0%-0.0%     | 0.0%-0.0%     | 0.0%-0.0%     | 0.0%-1.4%     | 0.0%-1.4%     | 0.0%-3.6%     | 0.1%-0.4%     |
| cytb-Leu206Phe    | 0/102         | 0/148         | 2/585         | 1/26          | 0/196         | 0/152         | 0/267         | 0/103         | 0/314         | 0/73          | 0/351         | 0/181         | 0/45          | 3/2543        |
|                   | 0.0%          | 0.0%          | 0.3%          | 3.8%          | 0.0%          | 0.0%          | 0.0%          | 0.0%          | 0.0%          | 0.0%          | 0.0%          | 0.0%          | 0.0%          | 0.1%          |
|                   | 0.0%-0.0%     | 0.0%-0.0%     | 0.0%-0.7%     | 0.0%-10.0%    | 0.0%-0.0%     | 0.0%-0.0%     | 0.0%-0.0%     | 0.0%-0.0%     | 0.0%-0.0%     | 0.0%-0.0%     | 0.0%-0.0%     | 0.0%-0.0%     | 0.0%-0.0%     | 0.0%-0.2%     |
| cytb-Phe292Tyr    | 0/79          | 0/147         | 0/512         | 0/15          | 0/179         | 0/115         | 0/181         | 0/103         | 10/300        | 0/71          | 0/338         | 0/80          | 0/30          | 10/2150       |
|                   | 0.0%          | 0.0%          | 0.0%          | 0.0%          | 0.0%          | 0.0%          | 0.0%          | 0.0%          | 3.3%          | 0.0%          | 0.0%          | 0.0%          | 0.0%          | 0.5%          |
|                   | 0.0%-0.0%     | 0.0%-0.0%     | 0.0%-0.0%     | 0.0%-0.0%     | 0.0%-0.0%     | 0.0%-0.0%     | 0.0%-0.0%     | 0.0%-0.0%     | 1.6%-5.0%     | 0.0%-0.0%     | 0.0%-0.0%     | 0.0%-0.0%     | 0.0%-0.0%     | 0.2%-0.7%     |
| cytb-Ser355Cys    | 0/234         | 1/267         | 1/636         | 0/41          | 2/239         | 0/285         | 0/299         | 0/266         | 1/346         | 0/79          | 0/409         | 1/316         | 0/73          | 6/3490        |
|                   | 0.0%          | 0.4%          | 0.2%          | 0.0%          | 0.8%          | 0.0%          | 0.0%          | 0.0%          | 0.3%          | 0.0%          | 0.0%          | 0.3%          | 0.0%          | 0.2%          |
|                   | 0.0%-0.0%     | 0.0%-1.0%     | 0.0%-0.4%     | 0.0%-0.0%     | 0.0%-1.8%     | 0.0%-0.0%     | 0.0%-0.0%     | 0.0%-0.0%     | 0.0%-0.8%     | 0.0%-0.0%     | 0.0%-0.0%     | 0.0%-0.8%     | 0.0%-0.0%     | 0.1%-0.3%     |
| cytb-Val9Ile      | 0/56          | 0/176         | 0/488         | 0/21          | 0/198         | 0/199         | 0/205         | 0/92          | 0/275         | 0/76          | 3/297         | 0/51          | 0/38          | 3/2172        |
|                   | 0.0%          | 0.0%          | 0.0%          | 0.0%          | 0.0%          | 0.0%          | 0.0%          | 0.0%          | 0.0%          | 0.0%          | 1.0%          | 0.0%          | 0.0%          | 0.1%          |
|                   | 0.0%-0.0%     | 0.0%-0.0%     | 0.0%-0.0%     | 0.0%-0.0%     | 0.0%-0.0%     | 0.0%-0.0%     | 0.0%-0.0%     | 0.0%-0.0%     | 0.0%-0.0%     | 0.0%-0.0%     | 0.1%-2.0%     | 0.0%-0.0%     | 0.0%-0.0%     | 0.0%-0.3%     |
| dhfr-ts-Asn51Ile  | 82/89         | 109/113       | 550/558       | 57/57         | 155/155       | 114/115       | 508/511       | 80/100        | 236/241       | 39/39         | 248/249       | 341/346       | 28/28         | 2547/2601     |
|                   | 92.1%         | 96.5%         | 98.6%         | 100.0%        | 100.0%        | 99.1%         | 99.4%         | 80.0%         | 97.9%         | 100.0%        | 99.6%         | 98.6%         | 100.0%        | 97.9%         |
|                   | 87.4%-96.8%   | 93.6%-99.3%   | 97.7%-99.4%   | 100.0%-100.0% | 100.0%-100.0% | 97.7%-100.0%  | 98.9%-100.0%  | 73.4%-86.6%   | 96.4%-99.4%   | 100.0%-100.0% | 98.9%-100.0%  | 97.5%-99.6%   | 100.0%-100.0% | 97.5%-98.4%   |
| dhfr-ts-Cys59Arg  | 79/89         | 107/113       | 515/558       | 52/57         | 148/155       | 113/115       | 475/511       | 95/100        | 229/241       | 39/39         | 240/249       | 325/346       | 27/28         | 2444/2601     |
|                   | 88.8%         | 94.7%         | 92.3%         | 91.2%         | 95.5%         | 98.3%         | 93.0%         | 95.0%         | 95.0%         | 100.0%        | 96.4%         | 93.9%         | 96.4%         | 94.0%         |
|                   | 83.3%-94.3%   | 91.2%-98.2%   | 90.4%-94.2%   | 85.1%-97.4%   | 92.7%-98.2%   | 96.3%-100.0%  | 91.1%-94.8%   | 91.4%-98.6%   | 92.7%-97.3%   | 100.0%-100.0% | 94.4%-98.3%   | 91.8%-96.0%   | 90.7%-100.0%  | 93.2%-94.7%   |
| dhfr-ts-Ile164Leu | 0/2           | 0/73          | 63/401        | 0/55          | 0/133         | 0/61          | 14/493        | 0/19          | 0/161         | 0/25          | 0/120         | 5/304         | 0/16          | 82/1863       |
|                   | 0.0%          | 0.0%          | 15.7%         | 0.0%          | 0.0%          | 0.0%          | 2.8%          | 0.0%          | 0.0%          | 0.0%          | 0.0%          | 1.6%          | 0.0%          | 4.4%          |
|                   | 0.0%-0.0%     | 0.0%-0.0%     | 12.7%-18.7%   | 0.0%-0.0%     | 0.0%-0.0%     | 0.0%-0.0%     | 1.6%-4.1%     | 0.0%-0.0%     | 0.0%-0.0%     | 0.0%-0.0%     | 0.0%-0.0%     | 0.4%-2.8%     | 0.0%-0.0%     | 3.6%-5.2%     |
| dhfr-ts-Ser108Asn | 29/29         | 83/83         | 486/486       | 55/55         | 140/140       | 72/72         | 490/490       | 79/79         | 198/198       | 33/33         | 182/182       | 307/309       | 17/17         | 2171/2173     |
|                   | 100.0%        | 100.0%        | 100.0%        | 100.0%        | 100.0%        | 100.0%        | 100.0%        | 100.0%        | 100.0%        | 100.0%        | 100.0%        | 100.0%        | 100.0%        | 99.9%         |
|                   | 100.0%-100.0% | 100.0%-100.0% | 100.0%-100.0% | 100.0%-100.0% | 100.0%-100.0% | 100.0%-100.0% | 100.0%-100.0% | 100.0%-100.0% | 100.0%-100.0% | 100.0%-100.0% | 100.0%-100.0% | 100.0%-100.0% | 98.6%-100.0%  | 100.0%-100.0% |
| dhps-Ala437Gly    | 34/43         | 82/86         | 483/509       | 64/64         | 133/140       | 81/87         | 482/499       | 47/65         | 195/214       | 26/29         | 173/186       | 309/318       | 14/16         | 2123/2256     |
|                   | 79.1%         | 95.3%         | 94.9%         | 100.0%        | 95.0%         | 93.1%         | 96.6%         | 72.3%         | 91.1%         | 89.7%         | 93.0%         | 97.2%         | 87.5%         | 94.1%         |
|                   | 68.9%-89.3%   | 91.6%-99.1%   | 93.3%-96.5%   | 100.0%-100.0% | 92.0%-98.0%   | 88.6%-97.6%   | 95.3%-97.9%   | 63.2%-81.4%   | 87.9%-94.3%   | 80.4%-99.0%   | 89.9%-96.1%   | 95.6%-98.7%   | 73.9%-100.0%  | 93.3%-94.9%   |
| dhps-Ala581Gly    | 14/117        | 6/138         | 157/631       | 26/65         | 57/172        | 37/161        | 3/519         | 0/139         | 12/270        | 2/46          | 4/291         | 16/409        | 14/40         | 348/2998      |
|                   | 12.0%         | 4.3%          | 24.9%         | 40.0%         | 33.1%         | 23.0%         | 0.6%          | 0.0%          | 4.4%          | 4.3%          | 1.4%          | 3.9%          | 35.0%         | 11.6%         |
|                   | 7.0%-16.9%    | 1.5%-7.2%     | 22.1%-27.7%   | 30.0%-50.0%   | 27.2%-39.0%   | 17.5%-28.4%   | 0.0%-1.1%     | 0.0%-0.0%     | 2.4%-6.5%     | 0.0%-9.3%     | 0.3%-2.5%     | 2.3%-5.5%     | 22.6%-47.4%   | 10.6%-12.6%   |
| dhps-Ala613Ser    | 4/81          | 0/115         | 1/604         | 0/67          | 0/149         | 0/127         | 0/510         | 1/113         | 3/238         | 0/37          | 0/238         | 0/366         | 0/30          | 9/2675        |
|                   | 4.9%          | 0.0%          | 0.2%          | 0.0%          | 0.0%          | 0.0%          | 0.0%          | 0.9%          | 1.3%          | 0.0%          | 0.0%          | 0.0%          | 0.0%          | 0.3%          |
|                   | 1.0%-8.9%     | 0.0%-0.0%     | 0.0%-0.4%     | 0.0%-0.0%     | 0.0%-0.0%     | 0.0%-0.0%     | 0.0%-0.0%     | 0.0%-2.3%     | 0.1%-2.4%     | 0.0%-0.0%     | 0.0%-0.0%     | 0.0%-0.0%     | 0.0%-0.0%     | 0.2%-0.5%     |
| dhps-Lys540Glu    | 83/97         | 118/124       | 547/582       | 56/56         | 152/159       | 124/129       | 503/517       | 85/107        | 225/250       | 37/40         | 239/259       | 348/358       | 27/32         | 2544/2710     |
|                   | 85.6%         | 95.2%         | 94.0%         | 100.0%        | 95.6%         | 96.1%         | 97.3%         | 79.4%         | 90.0%         | 92.5%         | 92.3%         | 97.2%         | 84.4%         | 93.9%         |
|                   | 79.7%-91.4%   | 92.0%-98.3%   | 92.4%-95.6%   | 100.0%-100.0% | 92.9%-98.3%   | 93.3%-98.9%   | 96.1%-98.5%   | 73.0%-85.9%   | 86.9%-93.1%   | 85.6%-99.4%   | 89.5%-95.0%   | 95.8%-98.6%   | 73.8%-94.9%   | 93.1%-94.6%   |
| dhps-Ser436Ala    | 4/43          | 3/86          | 2/509         | 0/64          | 3/140         | 5/87          | 5/499         | 4/65          | 4/214         | 0/29          | 3/186         | 3/318         | 1/16          | 37/2256       |

|                |            |           |             |             |           |           |           |            |           |           |           |           |            |           |
|----------------|------------|-----------|-------------|-------------|-----------|-----------|-----------|------------|-----------|-----------|-----------|-----------|------------|-----------|
|                | 9.3%       | 3.5%      | 0.4%        | 0.0%        | 2.1%      | 5.7%      | 1.0%      | 6.2%       | 1.9%      | 0.0%      | 1.6%      | 0.9%      | 6.2%       | 1.6%      |
|                | 2.0%-16.6% | 0.2%-6.7% | 0.0%-0.8%   | 0.0%-0.0%   | 0.1%-4.2% | 1.6%-9.9% | 0.3%-1.7% | 1.3%-11.1% | 0.3%-3.4% | 0.0%-0.0% | 0.1%-3.1% | 0.1%-1.8% | 0.0%-16.2% | 1.2%-2.1% |
| dhps-Ser436Phe | 0/43       | 0/86      | 1/509       | 0/64        | 0/140     | 0/87      | 0/499     | 1/65       | 1/214     | 0/29      | 0/186     | 0/318     | 0/16       | 3/2256    |
|                | 0.0%       | 0.0%      | 0.2%        | 0.0%        | 0.0%      | 0.0%      | 0.0%      | 1.5%       | 0.5%      | 0.0%      | 0.0%      | 0.0%      | 0.0%       | 0.1%      |
|                | 0.0%-0.0%  | 0.0%-0.0% | 0.0%-0.5%   | 0.0%-0.0%   | 0.0%-0.0% | 0.0%-0.0% | 0.0%-0.0% | 0.0%-4.0%  | 0.0%-1.2% | 0.0%-0.0% | 0.0%-0.0% | 0.0%-0.0% | 0.0%-0.0%  | 0.0%-0.3% |
| dhps-Val622Leu | 0/81       | 0/115     | 0/604       | 0/67        | 0/149     | 0/127     | 1/510     | 0/113      | 3/238     | 0/37      | 0/238     | 0/366     | 0/30       | 4/2675    |
|                | 0.0%       | 0.0%      | 0.0%        | 0.0%        | 0.0%      | 0.0%      | 0.2%      | 0.0%       | 1.3%      | 0.0%      | 0.0%      | 0.0%      | 0.0%       | 0.1%      |
|                | 0.0%-0.0%  | 0.0%-0.0% | 0.0%-0.0%   | 0.0%-0.0%   | 0.0%-0.0% | 0.0%-0.0% | 0.0%-0.5% | 0.0%-0.0%  | 0.1%-2.4% | 0.0%-0.0% | 0.0%-0.0% | 0.0%-0.0% | 0.0%-0.0%  | 0.0%-0.3% |
| exo-Asn369Asp  | 0/111      | 0/146     | 1/532       | 0/15        | 0/160     | 0/158     | 1/179     | 1/114      | 0/290     | 0/37      | 0/314     | 0/115     | 0/32       | 3/2203    |
|                | 0.0%       | 0.0%      | 0.2%        | 0.0%        | 0.0%      | 0.0%      | 0.6%      | 0.9%       | 0.0%      | 0.0%      | 0.0%      | 0.0%      | 0.0%       | 0.1%      |
|                | 0.0%-0.0%  | 0.0%-0.0% | 0.0%-0.5%   | 0.0%-0.0%   | 0.0%-0.0% | 0.0%-0.0% | 0.0%-1.5% | 0.0%-2.3%  | 0.0%-0.0% | 0.0%-0.0% | 0.0%-0.0% | 0.0%-0.0% | 0.0%-0.0%  | 0.0%-0.3% |
| exo-Asp393Asn  | 0/112      | 3/146     | 0/534       | 0/15        | 1/162     | 0/159     | 0/179     | 0/114      | 0/292     | 0/37      | 2/316     | 2/115     | 0/32       | 8/2213    |
|                | 0.0%       | 2.1%      | 0.0%        | 0.0%        | 0.6%      | 0.0%      | 0.0%      | 0.0%       | 0.0%      | 0.0%      | 0.6%      | 1.7%      | 0.0%       | 0.4%      |
|                | 0.0%-0.0%  | 0.1%-4.0% | 0.0%-0.0%   | 0.0%-0.0%   | 0.0%-1.6% | 0.0%-0.0% | 0.0%-0.0% | 0.0%-0.0%  | 0.0%-0.0% | 0.0%-0.0% | 0.0%-1.4% | 0.0%-3.7% | 0.0%-0.0%  | 0.2%-0.6% |
| exo-Val394Ile  | 0/112      | 0/146     | 3/534       | 0/15        | 0/162     | 0/159     | 0/179     | 0/114      | 0/292     | 0/37      | 0/316     | 0/115     | 0/32       | 3/2213    |
|                | 0.0%       | 0.0%      | 0.6%        | 0.0%        | 0.0%      | 0.0%      | 0.0%      | 0.0%       | 0.0%      | 0.0%      | 0.0%      | 0.0%      | 0.0%       | 0.1%      |
|                | 0.0%-0.0%  | 0.0%-0.0% | 0.0%-1.1%   | 0.0%-0.0%   | 0.0%-0.0% | 0.0%-0.0% | 0.0%-0.0% | 0.0%-0.0%  | 0.0%-0.0% | 0.0%-0.0% | 0.0%-0.0% | 0.0%-0.0% | 0.0%-0.0%  | 0.0%-0.3% |
| exo-Val410Ile  | 0/112      | 0/146     | 0/534       | 0/15        | 3/162     | 0/159     | 1/179     | 0/114      | 0/292     | 0/37      | 0/316     | 0/115     | 0/32       | 4/2213    |
|                | 0.0%       | 0.0%      | 0.0%        | 0.0%        | 1.9%      | 0.0%      | 0.6%      | 0.0%       | 0.0%      | 0.0%      | 0.0%      | 0.0%      | 0.0%       | 0.2%      |
|                | 0.0%-0.0%  | 0.0%-0.0% | 0.0%-0.0%   | 0.0%-0.0%   | 0.1%-3.6% | 0.0%-0.0% | 0.0%-1.5% | 0.0%-0.0%  | 0.0%-0.0% | 0.0%-0.0% | 0.0%-0.0% | 0.0%-0.0% | 0.0%-0.0%  | 0.0%-0.3% |
| fd-Asp193Tyr   | 0/100      | 3/145     | 95/527      | 5/13        | 1/168     | 1/156     | 0/168     | 0/102      | 3/264     | 0/40      | 13/310    | 1/113     | 1/24       | 123/2130  |
|                | 0.0%       | 2.1%      | 18.0%       | 38.5%       | 0.6%      | 0.6%      | 0.0%      | 0.0%       | 1.1%      | 0.0%      | 4.2%      | 0.9%      | 4.2%       | 5.8%      |
|                | 0.0%-0.0%  | 0.1%-4.0% | 15.3%-20.8% | 16.3%-60.7% | 0.0%-1.6% | 0.0%-1.7% | 0.0%-0.0% | 0.0%-0.0%  | 0.1%-2.2% | 0.0%-0.0% | 2.3%-6.1% | 0.0%-2.3% | 0.0%-10.9% | 4.9%-6.6% |
| fd-Lys166Glu   | 0/100      | 0/145     | 0/527       | 0/13        | 4/168     | 0/156     | 0/168     | 0/102      | 0/264     | 1/40      | 0/310     | 0/113     | 0/24       | 5/2130    |
|                | 0.0%       | 0.0%      | 0.0%        | 0.0%        | 2.4%      | 0.0%      | 0.0%      | 0.0%       | 0.0%      | 2.5%      | 0.0%      | 0.0%      | 0.0%       | 0.2%      |
|                | 0.0%-0.0%  | 0.0%-0.0% | 0.0%-0.0%   | 0.0%-0.0%   | 0.4%-4.3% | 0.0%-0.0% | 0.0%-0.0% | 0.0%-0.0%  | 0.0%-0.0% | 0.0%-6.6% | 0.0%-0.0% | 0.0%-0.0% | 0.0%-0.0%  | 0.1%-0.4% |
| k13-Ala175Thr  | 0/2        | 0/66      | 8/311       | 0/40        | 0/111     | 0/56      | 0/440     | 0/1        | 0/111     | 0/18      | 0/80      | 0/247     | 0/10       | 8/1493    |
|                | 0.0%       | 0.0%      | 2.6%        | 0.0%        | 0.0%      | 0.0%      | 0.0%      | 0.0%       | 0.0%      | 0.0%      | 0.0%      | 0.0%      | 0.0%       | 0.5%      |
|                | 0.0%-0.0%  | 0.0%-0.0% | 1.1%-4.0%   | 0.0%-0.0%   | 0.0%-0.0% | 0.0%-0.0% | 0.0%-0.0% | 0.0%-0.0%  | 0.0%-0.0% | 0.0%-0.0% | 0.0%-0.0% | 0.0%-0.0% | 0.0%-0.0%  | 0.2%-0.8% |
| k13-Ala578Ser  | 0/81       | 0/127     | 1/596       | 0/67        | 0/137     | 0/115     | 4/504     | 1/105      | 0/254     | 0/31      | 1/299     | 1/372     | 0/11       | 8/2699    |
|                | 0.0%       | 0.0%      | 0.2%        | 0.0%        | 0.0%      | 0.0%      | 0.8%      | 1.0%       | 0.0%      | 0.0%      | 0.3%      | 0.3%      | 0.0%       | 0.3%      |
|                | 0.0%-0.0%  | 0.0%-0.0% | 0.0%-0.4%   | 0.0%-0.0%   | 0.0%-0.0% | 0.0%-0.0% | 0.1%-1.4% | 0.0%-2.5%  | 0.0%-0.0% | 0.0%-0.0% | 0.0%-0.9% | 0.0%-0.7% | 0.0%-0.0%  | 0.1%-0.5% |
| k13-Arg255Lys  | 1/110      | 1/120     | 9/519       | 3/57        | 3/159     | 3/133     | 28/511    | 1/116      | 9/217     | 1/41      | 3/224     | 7/339     | 3/37       | 72/2583   |
|                | 0.9%       | 0.8%      | 1.7%        | 5.3%        | 1.9%      | 2.3%      | 5.5%      | 0.9%       | 4.1%      | 2.4%      | 1.3%      | 2.1%      | 8.1%       | 2.8%      |
|                | 0.0%-2.4%  | 0.0%-2.2% | 0.8%-2.7%   | 0.4%-10.1%  | 0.1%-3.7% | 0.1%-4.4% | 3.8%-7.1% | 0.0%-2.3%  | 1.9%-6.4% | 0.0%-6.4% | 0.1%-2.6% | 0.8%-3.3% | 0.7%-15.5% | 2.3%-3.3% |
| k13-Arg561His  | 0/42       | 0/86      | 36/466      | 0/48        | 0/105     | 1/87      | 0/457     | 0/66       | 0/174     | 0/16      | 0/186     | 2/295     | 0/4        | 39/2032   |
|                | 0.0%       | 0.0%      | 7.7%        | 0.0%        | 0.7%      | 1.1%      | 0.0%      | 0.0%       | 0.0%      | 0.0%      | 0.0%      | 0.7%      | 0.0%       | 1.9%      |
|                | 0.0%-0.0%  | 0.0%-0.0% | 5.7%-9.8%   | 0.0%-0.0%   | 0.0%-0.0% | 0.0%-3.0% | 0.0%-0.0% | 0.0%-0.0%  | 0.0%-0.0% | 0.0%-0.0% | 0.0%-0.0% | 0.0%-1.5% | 0.0%-0.0%  | 1.4%-2.4% |
| k13-Asn133Lys  | 0/3        | 0/65      | 1/321       | 0/41        | 0/117     | 0/53      | 2/435     | 0/16       | 0/114     | 0/22      | 0/90      | 1/250     | 0/2        | 4/1529    |
|                | 0.0%       | 0.0%      | 0.3%        | 0.0%        | 0.0%      | 0.0%      | 0.5%      | 0.0%       | 0.0%      | 0.0%      | 0.0%      | 0.4%      | 0.0%       | 0.3%      |
|                | 0.0%-0.0%  | 0.0%-0.0% | 0.0%-0.8%   | 0.0%-0.0%   | 0.0%-0.0% | 0.0%-0.0% | 0.0%-1.0% | 0.0%-0.0%  | 0.0%-0.0% | 0.0%-0.0% | 0.0%-0.0% | 0.0%-1.1% | 0.0%-0.0%  | 0.0%-0.5% |
| k13-Asn137Asp  | 0/3        | 0/65      | 1/321       | 0/41        | 0/117     | 0/53      | 1/435     | 0/16       | 0/114     | 0/22      | 0/90      | 1/250     | 0/2        | 3/1529    |
|                | 0.0%       | 0.0%      | 0.3%        | 0.0%        | 0.0%      | 0.0%      | 0.2%      | 0.0%       | 0.0%      | 0.0%      | 0.0%      | 0.4%      | 0.0%       | 0.2%      |
|                | 0.0%-0.0%  | 0.0%-0.0% | 0.0%-0.8%   | 0.0%-0.0%   | 0.0%-0.0% | 0.0%-0.0% | 0.0%-0.6% | 0.0%-0.0%  | 0.0%-0.0% | 0.0%-0.0% | 0.0%-0.0% | 0.0%-1.1% | 0.0%-0.0%  | 0.0%-0.4% |
| k13-Asn137Lys  | 0/3        | 0/65      | 1/321       | 0/41        | 0/117     | 0/53      | 1/435     | 0/16       | 0/114     | 0/22      | 0/90      | 1/250     | 0/2        | 3/1529    |
|                | 0.0%       | 0.0%      | 0.3%        | 0.0%        | 0.0%      | 0.0%      | 0.2%      | 0.0%       | 0.0%      | 0.0%      | 0.0%      | 0.4%      | 0.0%       | 0.2%      |
|                | 0.0%-0.0%  | 0.0%-0.0% | 0.0%-0.8%   | 0.0%-0.0%   | 0.0%-0.0% | 0.0%-0.0% | 0.0%-0.6% | 0.0%-0.0%  | 0.0%-0.0% | 0.0%-0.0% | 0.0%-0.0% | 0.0%-1.1% | 0.0%-0.0%  | 0.0%-0.4% |
| k13-Asn217His  | 0/20       | 0/72      | 3/394       | 0/50        | 0/132     | 0/66      | 3/469     | 0/31       | 0/176     | 1/29      | 0/132     | 3/272     | 0/21       | 10/1864   |
|                | 0.0%       | 0.0%      | 0.8%        | 0.0%        | 0.0%      | 0.0%      | 0.6%      | 0.0%       | 0.0%      | 3.4%      | 0.0%      | 1.1%      | 0.0%       | 0.5%      |
|                | 0.0%-0.0%  | 0.0%-0.0% | 0.0%-1.5%   | 0.0%-0.0%   | 0.0%-0.0% | 0.0%-0.0% | 0.0%-1.2% | 0.0%-0.0%  | 0.0%-0.0% | 0.0%-9.0% | 0.0%-0.0% | 0.1%-2.1% | 0.0%-0.0%  | 0.3%-0.8% |

|               |           |            |             |             |             |            |             |           |            |            |            |             |             |             |
|---------------|-----------|------------|-------------|-------------|-------------|------------|-------------|-----------|------------|------------|------------|-------------|-------------|-------------|
| k13-Asn264Ser | 0/110     | 0/120      | 1/519       | 0/57        | 0/159       | 0/133      | 1/511       | 0/116     | 0/217      | 0/41       | 0/224      | 2/339       | 0/37        | 4/2583      |
|               | 0.0%      | 0.0%       | 0.2%        | 0.0%        | 0.0%        | 0.0%       | 0.2%        | 0.0%      | 0.0%       | 0.0%       | 0.0%       | 0.6%        | 0.0%        | 0.2%        |
|               | 0.0%-0.0% | 0.0%-0.0%  | 0.0%-0.5%   | 0.0%-0.0%   | 0.0%-0.0%   | 0.0%-0.0%  | 0.0%-0.5%   | 0.0%-0.0% | 0.0%-0.0%  | 0.0%-0.0%  | 0.0%-0.0%  | 0.0%-1.3%   | 0.0%-0.0%   | 0.0%-0.3%   |
| k13-Gln271Leu | 0/100     | 0/104      | 1/492       | 0/47        | 0/147       | 0/115      | 2/491       | 0/102     | 0/178      | 0/33       | 0/198      | 0/314       | 0/28        | 3/2349      |
|               | 0.0%      | 0.0%       | 0.2%        | 0.0%        | 0.0%        | 0.0%       | 0.4%        | 0.0%      | 0.0%       | 0.0%       | 0.0%       | 0.0%        | 0.0%        | 0.1%        |
|               | 0.0%-0.0% | 0.0%-0.0%  | 0.0%-0.5%   | 0.0%-0.0%   | 0.0%-0.0%   | 0.0%-0.0%  | 0.0%-0.9%   | 0.0%-0.0% | 0.0%-0.0%  | 0.0%-0.0%  | 0.0%-0.0%  | 0.0%-0.0%   | 0.0%-0.0%   | 0.0%-0.2%   |
| k13-Glu208Lys | 0/20      | 0/72       | 8/394       | 0/50        | 0/132       | 0/66       | 0/469       | 0/31      | 0/176      | 0/29       | 0/132      | 0/272       | 0/21        | 8/1864      |
|               | 0.0%      | 0.0%       | 2.0%        | 0.0%        | 0.0%        | 0.0%       | 0.0%        | 0.0%      | 0.0%       | 0.0%       | 0.0%       | 0.0%        | 0.0%        | 0.4%        |
|               | 0.0%-0.0% | 0.0%-0.0%  | 0.9%-3.2%   | 0.0%-0.0%   | 0.0%-0.0%   | 0.0%-0.0%  | 0.0%-0.0%   | 0.0%-0.0% | 0.0%-0.0%  | 0.0%-0.0%  | 0.0%-0.0%  | 0.0%-0.0%   | 0.0%-0.0%   | 0.2%-0.7%   |
| k13-Gly112Glu | 0/3       | 0/65       | 1/321       | 0/41        | 0/117       | 0/53       | 2/435       | 0/16      | 0/114      | 0/22       | 0/90       | 0/250       | 0/2         | 3/1529      |
|               | 0.0%      | 0.0%       | 0.3%        | 0.0%        | 0.0%        | 0.0%       | 0.5%        | 0.0%      | 0.0%       | 0.0%       | 0.0%       | 0.0%        | 0.0%        | 0.2%        |
|               | 0.0%-0.0% | 0.0%-0.0%  | 0.0%-0.8%   | 0.0%-0.0%   | 0.0%-0.0%   | 0.0%-0.0%  | 0.0%-1.0%   | 0.0%-0.0% | 0.0%-0.0%  | 0.0%-0.0%  | 0.0%-0.0%  | 0.0%-0.0%   | 0.0%-0.0%   | 0.0%-0.4%   |
| k13-His136Asn | 0/3       | 0/65       | 0/321       | 0/41        | 0/117       | 1/53       | 1/435       | 0/16      | 1/114      | 0/22       | 0/90       | 3/250       | 1/2         | 7/1529      |
|               | 0.0%      | 0.0%       | 0.0%        | 0.0%        | 0.0%        | 1.9%       | 0.2%        | 0.0%      | 0.9%       | 0.0%       | 0.0%       | 1.2%        | 50.0%       | 0.5%        |
|               | 0.0%-0.0% | 0.0%-0.0%  | 0.0%-0.0%   | 0.0%-0.0%   | 0.0%-0.0%   | 0.0%-5.0%  | 0.0%-0.6%   | 0.0%-0.0% | 0.0%-2.3%  | 0.0%-0.0%  | 0.0%-0.0%  | 0.1%-2.3%   | 0.0%-100.0% | 0.2%-0.7%   |
| k13-His384Arg | 0/17      | 0/72       | 4/411       | 0/46        | 0/129       | 0/58       | 0/468       | 0/62      | 0/187      | 0/25       | 1/157      | 0/282       | 0/4         | 5/1918      |
|               | 0.0%      | 0.0%       | 1.0%        | 0.0%        | 0.0%        | 0.0%       | 0.0%        | 0.0%      | 0.0%       | 0.0%       | 0.6%       | 0.0%        | 0.0%        | 0.3%        |
|               | 0.0%-0.0% | 0.0%-0.0%  | 0.2%-1.8%   | 0.0%-0.0%   | 0.0%-0.0%   | 0.0%-0.0%  | 0.0%-0.0%   | 0.0%-0.0% | 0.0%-0.0%  | 0.0%-0.0%  | 0.0%-1.7%  | 0.0%-0.0%   | 0.0%-0.0%   | 0.1%-0.5%   |
| k13-Ile205Thr | 0/2       | 0/66       | 6/306       | 0/40        | 0/110       | 0/53       | 0/427       | 0/1       | 0/107      | 0/16       | 0/77       | 1/246       | 0/9         | 7/1460      |
|               | 0.0%      | 0.0%       | 2.0%        | 0.0%        | 0.0%        | 0.0%       | 0.0%        | 0.0%      | 0.0%       | 0.0%       | 0.0%       | 0.4%        | 0.0%        | 0.5%        |
|               | 0.0%-0.0% | 0.0%-0.0%  | 0.7%-3.3%   | 0.0%-0.0%   | 0.0%-0.0%   | 0.0%-0.0%  | 0.0%-0.0%   | 0.0%-0.0% | 0.0%-0.0%  | 0.0%-0.0%  | 0.0%-0.0%  | 0.0%-1.1%   | 0.0%-0.0%   | 0.2%-0.8%   |
| k13-Leu116Ile | 0/3       | 0/65       | 1/321       | 0/41        | 0/117       | 0/53       | 3/435       | 0/16      | 0/114      | 0/22       | 0/90       | 2/250       | 0/2         | 6/1529      |
|               | 0.0%      | 0.0%       | 0.3%        | 0.0%        | 0.0%        | 0.0%       | 0.7%        | 0.0%      | 0.0%       | 0.0%       | 0.0%       | 0.8%        | 0.0%        | 0.4%        |
|               | 0.0%-0.0% | 0.0%-0.0%  | 0.0%-0.8%   | 0.0%-0.0%   | 0.0%-0.0%   | 0.0%-0.0%  | 0.0%-1.3%   | 0.0%-0.0% | 0.0%-0.0%  | 0.0%-0.0%  | 0.0%-0.0%  | 0.0%-1.7%   | 0.0%-0.0%   | 0.1%-0.7%   |
| k13-Leu177Ile | 0/2       | 0/66       | 0/306       | 0/40        | 0/110       | 0/53       | 3/427       | 0/1       | 0/107      | 0/16       | 0/77       | 0/246       | 0/9         | 3/1460      |
|               | 0.0%      | 0.0%       | 0.0%        | 0.0%        | 0.0%        | 0.0%       | 0.7%        | 0.0%      | 0.0%       | 0.0%       | 0.0%       | 0.0%        | 0.0%        | 0.2%        |
|               | 0.0%-0.0% | 0.0%-0.0%  | 0.0%-0.0%   | 0.0%-0.0%   | 0.0%-0.0%   | 0.0%-0.0%  | 0.0%-1.4%   | 0.0%-0.0% | 0.0%-0.0%  | 0.0%-0.0%  | 0.0%-0.0%  | 0.0%-0.0%   | 0.0%-0.0%   | 0.0%-0.4%   |
| k13-Leu258Met | 4/110     | 3/120      | 6/519       | 1/57        | 3/159       | 1/133      | 10/511      | 1/116     | 12/217     | 2/41       | 3/224      | 17/339      | 0/37        | 63/2583     |
|               | 3.6%      | 2.5%       | 1.2%        | 1.8%        | 1.9%        | 0.8%       | 2.0%        | 0.9%      | 5.5%       | 4.9%       | 1.3%       | 5.0%        | 0.0%        | 2.4%        |
|               | 0.7%-6.6% | 0.2%-4.8%  | 0.4%-1.9%   | 0.0%-4.6%   | 0.1%-3.7%   | 0.0%-2.0%  | 0.9%-3.0%   | 0.0%-2.3% | 3.0%-8.1%  | 0.0%-10.4% | 0.1%-2.6%  | 3.1%-7.0%   | 0.0%-0.0%   | 1.9%-2.9%   |
| k13-Leu99Val  | 0/2       | 0/68       | 0/359       | 0/54        | 0/120       | 0/53       | 1/470       | 0/20      | 0/153      | 0/22       | 0/99       | 4/295       | 0/2         | 5/1717      |
|               | 0.0%      | 0.0%       | 0.0%        | 0.0%        | 0.0%        | 0.0%       | 0.2%        | 0.0%      | 0.0%       | 0.0%       | 0.0%       | 1.4%        | 0.0%        | 0.3%        |
|               | 0.0%-0.0% | 0.0%-0.0%  | 0.0%-0.0%   | 0.0%-0.0%   | 0.0%-0.0%   | 0.0%-0.0%  | 0.0%-0.6%   | 0.0%-0.0% | 0.0%-0.0%  | 0.0%-0.0%  | 0.0%-0.0%  | 0.2%-2.5%   | 0.0%-0.0%   | 0.1%-0.5%   |
| k13-Lys108Glu | 0/3       | 0/65       | 0/321       | 0/41        | 4/117       | 0/53       | 1/435       | 0/16      | 0/114      | 0/22       | 0/90       | 0/250       | 0/2         | 5/1529      |
|               | 0.0%      | 0.0%       | 0.0%        | 0.0%        | 3.4%        | 0.0%       | 0.2%        | 0.0%      | 0.0%       | 0.0%       | 0.0%       | 0.0%        | 0.0%        | 0.3%        |
|               | 0.0%-0.0% | 0.0%-0.0%  | 0.0%-0.0%   | 0.0%-0.0%   | 0.7%-6.2%   | 0.0%-0.0%  | 0.0%-0.6%   | 0.0%-0.0% | 0.0%-0.0%  | 0.0%-0.0%  | 0.0%-0.0%  | 0.0%-0.0%   | 0.0%-0.0%   | 0.1%-0.6%   |
| k13-Lys124Asn | 0/3       | 0/65       | 0/321       | 0/41        | 0/117       | 0/53       | 5/435       | 0/16      | 0/114      | 0/22       | 0/90       | 1/250       | 0/2         | 6/1529      |
|               | 0.0%      | 0.0%       | 0.0%        | 0.0%        | 0.0%        | 0.0%       | 1.1%        | 0.0%      | 0.0%       | 0.0%       | 0.0%       | 0.4%        | 0.0%        | 0.4%        |
|               | 0.0%-0.0% | 0.0%-0.0%  | 0.0%-0.0%   | 0.0%-0.0%   | 0.0%-0.0%   | 0.0%-0.0%  | 0.3%-2.0%   | 0.0%-0.0% | 0.0%-0.0%  | 0.0%-0.0%  | 0.0%-0.0%  | 0.0%-1.1%   | 0.0%-0.0%   | 0.1%-0.7%   |
| k13-Lys189Asn | 0/2       | 0/66       | 1/306       | 0/40        | 0/110       | 0/53       | 2/427       | 0/1       | 0/107      | 3/16       | 0/77       | 5/246       | 0/9         | 11/1460     |
|               | 0.0%      | 0.0%       | 0.3%        | 0.0%        | 0.0%        | 0.0%       | 0.5%        | 0.0%      | 0.0%       | 18.8%      | 0.0%       | 2.0%        | 0.0%        | 0.8%        |
|               | 0.0%-0.0% | 0.0%-0.0%  | 0.0%-0.9%   | 0.0%-0.0%   | 0.0%-0.0%   | 0.0%-0.0%  | 0.0%-1.0%   | 0.0%-0.0% | 0.0%-0.0%  | 2.7%-34.8% | 0.0%-0.0%  | 0.6%-3.5%   | 0.0%-0.0%   | 0.4%-1.1%   |
| k13-Lys189Thr | 0/2       | 5/66       | 61/306      | 13/40       | 18/110      | 7/53       | 104/427     | 0/1       | 12/107     | 1/16       | 10/77      | 68/246      | 1/9         | 300/1460    |
|               | 0.0%      | 7.6%       | 19.9%       | 32.5%       | 16.4%       | 13.2%      | 24.4%       | 0.0%      | 11.2%      | 6.2%       | 13.0%      | 27.6%       | 11.1%       | 20.5%       |
|               | 0.0%-0.0% | 2.2%-12.9% | 16.2%-23.7% | 20.3%-44.7% | 10.6%-22.2% | 5.6%-20.9% | 20.9%-27.8% | 0.0%-0.0% | 6.2%-16.2% | 0.0%-16.2% | 6.7%-19.3% | 23.0%-32.3% | 0.0%-28.3%  | 18.8%-22.3% |
| k13-Lys9Arg   | 0/6       | 0/65       | 0/358       | 0/51        | 0/118       | 0/55       | 0/468       | 0/14      | 3/144      | 0/19       | 0/94       | 0/279       | 0/5         | 3/1676      |
|               | 0.0%      | 0.0%       | 0.0%        | 0.0%        | 0.0%        | 0.0%       | 0.0%        | 0.0%      | 2.1%       | 0.0%       | 0.0%       | 0.0%        | 0.0%        | 0.2%        |
|               | 0.0%-0.0% | 0.0%-0.0%  | 0.0%-0.0%   | 0.0%-0.0%   | 0.0%-0.0%   | 0.0%-0.0%  | 0.0%-0.0%   | 0.0%-0.0% | 0.1%-4.0%  | 0.0%-0.0%  | 0.0%-0.0%  | 0.0%-0.0%   | 0.0%-0.0%   | 0.0%-0.3%   |
| k13-Phe699Cys | 0/32      | 0/73       | 3/410       | 0/50        | 0/138       | 0/67       | 0/485       | 0/36      | 0/195      | 0/33       | 0/139      | 0/291       | 0/21        | 3/1970      |
|               | 0.0%      | 0.0%       | 0.7%        | 0.0%        | 0.0%        | 0.0%       | 0.0%        | 0.0%      | 0.0%       | 0.0%       | 0.0%       | 0.0%        | 0.0%        | 0.2%        |

|                   |             |            |           |           |           |            |           |             |           |           |           |           |           |           |
|-------------------|-------------|------------|-----------|-----------|-----------|------------|-----------|-------------|-----------|-----------|-----------|-----------|-----------|-----------|
| k13-Pro419Ser     | 0.0%-0.0%   | 0.0%-0.0%  | 0.0%-1.4% | 0.0%-0.0% | 0.0%-0.0% | 0.0%-0.0%  | 0.0%-0.0% | 0.0%-0.0%   | 0.0%-0.0% | 0.0%-0.0% | 0.0%-0.0% | 0.0%-0.0% | 0.0%-0.0% | 0.0%-0.3% |
|                   | 0/97        | 0/126      | 5/591     | 0/66      | 0/170     | 0/126      | 0/520     | 0/116       | 0/281     | 0/44      | 0/306     | 1/374     | 0/36      | 6/2853    |
|                   | 0.0%        | 0.0%       | 0.8%      | 0.0%      | 0.0%      | 0.0%       | 0.0%      | 0.0%        | 0.0%      | 0.0%      | 0.0%      | 0.3%      | 0.0%      | 0.2%      |
| k13-Pro667Ser     | 0.0%-0.0%   | 0.0%-0.0%  | 0.2%-1.5% | 0.0%-0.0% | 0.0%-0.0% | 0.0%-0.0%  | 0.0%-0.0% | 0.0%-0.0%   | 0.0%-0.0% | 0.0%-0.0% | 0.0%-0.0% | 0.0%-0.7% | 0.0%-0.0% | 0.1%-0.4% |
|                   | 0/51        | 0/101      | 2/531     | 0/69      | 0/161     | 0/104      | 3/509     | 0/76        | 0/250     | 0/42      | 0/236     | 0/336     | 0/31      | 5/2497    |
|                   | 0.0%        | 0.0%       | 0.4%      | 0.0%      | 0.0%      | 0.0%       | 0.0%      | 0.0%        | 0.0%      | 0.0%      | 0.0%      | 0.0%      | 0.0%      | 0.2%      |
| k13-Pro667Thr     | 0.0%-0.0%   | 0.0%-0.0%  | 0.0%-0.8% | 0.0%-0.0% | 0.0%-0.0% | 0.0%-0.0%  | 0.0%-1.1% | 0.0%-0.0%   | 0.0%-0.0% | 0.0%-0.0% | 0.0%-0.0% | 0.0%-0.0% | 0.0%-0.0% | 0.1%-0.3% |
|                   | 0/51        | 0/101      | 0/531     | 0/69      | 0/161     | 0/104      | 0/509     | 0/76        | 3/250     | 0/42      | 0/236     | 0/336     | 0/31      | 3/2497    |
|                   | 0.0%        | 0.0%       | 0.0%      | 0.0%      | 0.0%      | 0.0%       | 0.0%      | 0.0%        | 1.2%      | 0.0%      | 0.0%      | 0.0%      | 0.0%      | 0.1%      |
| k13-Ser182Thr     | 0.0%-0.0%   | 0.0%-0.0%  | 0.0%-0.0% | 0.0%-0.0% | 0.0%-0.0% | 0.0%-0.0%  | 0.0%-0.0% | 0.0%-0.0%   | 0.1%-2.3% | 0.0%-0.0% | 0.0%-0.0% | 0.0%-0.0% | 0.0%-0.0% | 0.0%-0.2% |
|                   | 0/2         | 0/66       | 4/306     | 0/40      | 0/110     | 0/53       | 2/427     | 0/1         | 1/107     | 0/16      | 1/77      | 2/246     | 0/9       | 10/1460   |
|                   | 0.0%        | 0.0%       | 1.3%      | 0.0%      | 0.0%      | 0.0%       | 0.5%      | 0.0%        | 0.9%      | 0.0%      | 1.3%      | 0.8%      | 0.0%      | 0.7%      |
| k13-Thr149Ser     | 0.0%-0.0%   | 0.0%-0.0%  | 0.2%-2.4% | 0.0%-0.0% | 0.0%-0.0% | 0.0%-0.0%  | 0.0%-1.0% | 0.0%-0.0%   | 0.0%-2.5% | 0.0%-0.0% | 0.0%-3.4% | 0.0%-1.8% | 0.0%-0.0% | 0.3%-1.0% |
|                   | 0/3         | 0/65       | 1/321     | 0/41      | 0/117     | 0/53       | 12/435    | 0/16        | 0/114     | 0/22      | 1/90      | 2/250     | 0/2       | 16/1529   |
|                   | 0.0%        | 0.0%       | 0.3%      | 0.0%      | 0.0%      | 0.0%       | 2.8%      | 0.0%        | 0.0%      | 0.0%      | 1.1%      | 0.8%      | 0.0%      | 1.0%      |
| k13-Thr207Lys     | 0.0%-0.0%   | 0.0%-0.0%  | 0.0%-0.8% | 0.0%-0.0% | 0.0%-0.0% | 0.0%-0.0%  | 1.5%-4.1% | 0.0%-0.0%   | 0.0%-0.0% | 0.0%-0.0% | 0.0%-2.9% | 0.0%-1.7% | 0.0%-0.0% | 0.6%-1.5% |
|                   | 0/20        | 0/72       | 3/394     | 0/50      | 0/132     | 0/66       | 1/469     | 0/31        | 0/175     | 0/29      | 0/131     | 0/272     | 0/21      | 4/1862    |
|                   | 0.0%        | 0.0%       | 0.8%      | 0.0%      | 0.0%      | 0.0%       | 0.2%      | 0.0%        | 0.0%      | 0.0%      | 0.0%      | 0.0%      | 0.0%      | 0.2%      |
| k13-Thr348Ile     | 0.0%-0.0%   | 0.0%-0.0%  | 0.0%-1.5% | 0.0%-0.0% | 0.0%-0.0% | 0.0%-0.0%  | 0.0%-0.6% | 0.0%-0.0%   | 0.0%-0.0% | 0.0%-0.0% | 0.0%-0.0% | 0.0%-0.0% | 0.0%-0.0% | 0.0%-0.4% |
|                   | 0/12        | 0/73       | 5/386     | 0/46      | 0/141     | 0/60       | 0/467     | 0/48        | 0/158     | 0/30      | 0/130     | 0/279     | 0/18      | 5/1848    |
|                   | 0.0%        | 0.0%       | 1.3%      | 0.0%      | 0.0%      | 0.0%       | 0.0%      | 0.0%        | 0.0%      | 0.0%      | 0.0%      | 0.0%      | 0.0%      | 0.3%      |
| k13-Val555Ala     | 0.0%-0.0%   | 0.0%-0.0%  | 0.3%-2.2% | 0.0%-0.0% | 0.0%-0.0% | 0.0%-0.0%  | 0.0%-0.0% | 0.0%-0.0%   | 0.0%-0.0% | 0.0%-0.0% | 0.0%-0.0% | 0.0%-0.0% | 0.0%-0.0% | 0.1%-0.5% |
|                   | 0/42        | 0/86       | 3/466     | 0/48      | 0/105     | 0/87       | 0/457     | 0/66        | 0/174     | 0/16      | 0/186     | 0/295     | 0/4       | 3/2032    |
|                   | 0.0%        | 0.0%       | 0.6%      | 0.0%      | 0.0%      | 0.0%       | 0.0%      | 0.0%        | 0.0%      | 0.0%      | 0.0%      | 0.0%      | 0.0%      | 0.1%      |
| kelch10-Glu668Lys | 0.0%-0.0%   | 0.0%-0.0%  | 0.0%-1.3% | 0.0%-0.0% | 0.0%-0.0% | 0.0%-0.0%  | 0.0%-0.0% | 0.0%-0.0%   | 0.0%-0.0% | 0.0%-0.0% | 0.0%-0.0% | 0.0%-0.0% | 0.0%-0.0% | 0.0%-0.3% |
|                   | 1/48        | 0/95       | 2/429     | 0/12      | 0/158     | 0/92       | 0/153     | 0/76        | 3/251     | 0/33      | 2/262     | 0/40      | 0/26      | 8/1675    |
|                   | 2.1%        | 0.0%       | 0.5%      | 0.0%      | 0.0%      | 0.0%       | 0.0%      | 0.0%        | 1.2%      | 0.0%      | 0.8%      | 0.0%      | 0.0%      | 0.5%      |
| kelch10-Leu622Ile | 0.0%-5.5%   | 0.0%-0.0%  | 0.0%-1.0% | 0.0%-0.0% | 0.0%-0.0% | 0.0%-0.0%  | 0.0%-0.0% | 0.0%-0.0%   | 0.1%-2.3% | 0.0%-0.0% | 0.0%-1.6% | 0.0%-0.0% | 0.0%-0.0% | 0.2%-0.8% |
|                   | 0/14        | 0/70       | 3/312     | 0/4       | 1/130     | 1/58       | 0/128     | 0/47        | 4/176     | 0/24      | 0/134     | 0/17      | 0/9       | 9/1123    |
|                   | 0.0%        | 0.0%       | 1.0%      | 0.0%      | 0.0%      | 1.7%       | 0.0%      | 0.0%        | 2.3%      | 0.0%      | 0.0%      | 0.0%      | 0.0%      | 0.8%      |
| kelch10-Thr636Ser | 0.0%-0.0%   | 0.0%-0.0%  | 0.1%-1.9% | 0.0%-0.0% | 0.0%-2.0% | 0.0%-4.5%  | 0.0%-0.0% | 0.0%-0.0%   | 0.4%-4.1% | 0.0%-0.0% | 0.0%-0.0% | 0.0%-0.0% | 0.0%-0.0% | 0.4%-1.2% |
|                   | 0/48        | 0/95       | 4/429     | 0/12      | 0/158     | 0/92       | 2/153     | 0/76        | 4/251     | 0/33      | 1/262     | 0/39      | 0/26      | 11/1674   |
|                   | 0.0%        | 0.0%       | 0.9%      | 0.0%      | 0.0%      | 0.0%       | 1.3%      | 0.0%        | 1.6%      | 0.0%      | 0.4%      | 0.0%      | 0.0%      | 0.7%      |
| mcp-Pro280Thr     | 0.0%-0.0%   | 0.0%-0.0%  | 0.2%-1.7% | 0.0%-0.0% | 0.0%-0.0% | 0.0%-0.0%  | 0.0%-2.8% | 0.0%-0.0%   | 0.3%-2.9% | 0.0%-0.0% | 0.0%-1.0% | 0.0%-0.0% | 0.0%-0.0% | 0.3%-1.0% |
|                   | 0/4         | 4/69       | 3/292     | 0/2       | 1/132     | 4/55       | 1/128     | 0/41        | 3/145     | 0/26      | 0/121     | 0/20      | 0/8       | 16/1043   |
|                   | 0.0%        | 5.8%       | 1.0%      | 0.0%      | 0.8%      | 7.3%       | 0.8%      | 0.0%        | 2.1%      | 0.0%      | 0.0%      | 0.0%      | 0.0%      | 1.5%      |
| mdr1-Ala891Thr    | 0.0%-0.0%   | 1.2%-10.4% | 0.1%-2.0% | 0.0%-0.0% | 0.0%-2.0% | 1.5%-13.0% | 0.0%-2.1% | 0.0%-0.0%   | 0.1%-4.0% | 0.0%-0.0% | 0.0%-0.0% | 0.0%-0.0% | 0.0%-0.0% | 0.9%-2.2% |
|                   | 0/23        | 0/66       | 0/333     | 0/41      | 2/122     | 1/58       | 0/460     | 0/20        | 0/134     | 0/22      | 0/92      | 0/270     | 0/10      | 3/1651    |
|                   | 0.0%        | 0.0%       | 0.0%      | 0.0%      | 1.6%      | 1.7%       | 0.0%      | 0.0%        | 0.0%      | 0.0%      | 0.0%      | 0.0%      | 0.0%      | 0.2%      |
| mdr1-Asn1042Asp   | 0.0%-0.0%   | 0.0%-0.0%  | 0.0%-0.0% | 0.0%-0.0% | 0.0%-3.5% | 0.0%-4.5%  | 0.0%-0.0% | 0.0%-0.0%   | 0.0%-0.0% | 0.0%-0.0% | 0.0%-0.0% | 0.0%-0.0% | 0.0%-0.0% | 0.0%-0.4% |
|                   | 0/146       | 0/169      | 2/629     | 0/71      | 0/198     | 0/187      | 0/536     | 0/185       | 3/276     | 0/62      | 0/276     | 0/430     | 0/56      | 5/3221    |
|                   | 0.0%        | 0.0%       | 0.3%      | 0.0%      | 0.0%      | 0.0%       | 0.0%      | 0.0%        | 1.1%      | 0.0%      | 0.0%      | 0.0%      | 0.0%      | 0.2%      |
| mdr1-Asn1199Ser   | 0.0%-0.0%   | 0.0%-0.0%  | 0.0%-0.7% | 0.0%-0.0% | 0.0%-0.0% | 0.0%-0.0%  | 0.0%-0.0% | 0.0%-0.0%   | 0.1%-2.1% | 0.0%-0.0% | 0.0%-0.0% | 0.0%-0.0% | 0.0%-0.0% | 0.0%-0.3% |
|                   | no coverage | 0/65       | 0/339     | 0/53      | 0/105     | 0/50       | 2/462     | no coverage | 1/108     | 0/13      | 0/70      | 0/289     | 0/1       | 3/1555    |
|                   | no coverage | 0.0%       | 0.0%      | 0.0%      | 0.0%      | 0.0%       | 0.4%      | no coverage | 0.9%      | 0.0%      | 0.0%      | 0.0%      | 0.0%      | 0.2%      |
| mdr1-Asn12Thr     | no coverage | 0.0%-0.0%  | 0.0%-0.0% | 0.0%-0.0% | 0.0%-0.0% | 0.0%-0.0%  | 0.0%-0.9% | no coverage | 0.0%-2.4% | 0.0%-0.0% | 0.0%-0.0% | 0.0%-0.0% | 0.0%-0.0% | 0.0%-0.4% |
|                   | 0/24        | 0/70       | 0/408     | 0/62      | 2/141     | 1/64       | 1/498     | 0/13        | 0/187     | 0/30      | 0/119     | 0/315     | 0/20      | 4/1951    |
|                   | 0.0%        | 0.0%       | 0.0%      | 0.0%      | 1.4%      | 1.6%       | 0.2%      | 0.0%        | 0.0%      | 0.0%      | 0.0%      | 0.0%      | 0.0%      | 0.2%      |
| mdr1-Asn504Lys    | 0.0%-0.0%   | 0.0%-0.0%  | 0.0%-0.0% | 0.0%-0.0% | 0.0%-3.1% | 0.0%-4.1%  | 0.0%-0.5% | 0.0%-0.0%   | 0.0%-0.0% | 0.0%-0.0% | 0.0%-0.0% | 0.0%-0.0% | 0.0%-0.0% | 0.0%-0.4% |
|                   | 0/5         | 0/74       | 5/365     | 0/39      | 0/137     | 0/63       | 4/442     | 0/26        | 0/166     | 0/29      | 3/125     | 5/250     | 0/23      | 17/1744   |

|                 |             |           |           |            |           |           |           |             |           |            |           |           |            |           |
|-----------------|-------------|-----------|-----------|------------|-----------|-----------|-----------|-------------|-----------|------------|-----------|-----------|------------|-----------|
| mdr1-Asn649Asp  | 0.0%        | 0.0%      | 1.4%      | 0.0%       | 0.0%      | 0.0%      | 0.9%      | 0.0%        | 0.0%      | 0.0%       | 2.4%      | 2.0%      | 0.0%       | 1.0%      |
|                 | 0.0%-0.0%   | 0.0%-0.0% | 0.4%-2.4% | 0.0%-0.0%  | 0.0%-0.0% | 0.0%-0.0% | 0.2%-1.6% | 0.0%-0.0%   | 0.0%-0.0% | 0.0%-0.0%  | 0.1%-4.7% | 0.5%-3.5% | 0.0%-0.0%  | 0.6%-1.4% |
|                 | 0/56        | 0/94      | 8/497     | 1/47       | 1/136     | 0/91      | 14/468    | 0/71        | 2/198     | 0/31       | 1/197     | 9/290     | 0/12       | 36/2188   |
| mdr1-Asn652Asp  | 0.0%        | 0.0%      | 1.6%      | 2.1%       | 0.7%      | 0.0%      | 3.0%      | 0.0%        | 1.0%      | 0.0%       | 0.5%      | 3.1%      | 0.0%       | 1.6%      |
|                 | 0.0%-0.0%   | 0.0%-0.0% | 0.7%-2.5% | 0.0%-5.6%  | 0.0%-1.9% | 0.0%-0.0% | 1.7%-4.3% | 0.0%-0.0%   | 0.0%-2.2% | 0.0%-0.0%  | 0.0%-1.3% | 1.4%-4.8% | 0.0%-0.0%  | 1.2%-2.1% |
|                 | 3/56        | 1/94      | 12/497    | 5/47       | 2/136     | 1/91      | 22/468    | 3/71        | 3/198     | 2/31       | 7/197     | 6/290     | 0/12       | 67/2188   |
| mdr1-Asn653Asp  | 5.4%        | 1.1%      | 2.4%      | 10.6%      | 1.5%      | 1.1%      | 4.7%      | 4.2%        | 1.5%      | 6.5%       | 3.6%      | 2.1%      | 0.0%       | 3.1%      |
|                 | 0.4%-10.3%  | 0.0%-2.8% | 1.3%-3.5% | 3.2%-18.0% | 0.0%-3.2% | 0.0%-2.9% | 3.1%-6.3% | 0.3%-8.2%   | 0.1%-2.9% | 0.0%-13.7% | 1.4%-5.7% | 0.7%-3.4% | 0.0%-0.0%  | 2.5%-3.7% |
|                 | 0/56        | 0/94      | 3/497     | 0/47       | 0/136     | 0/91      | 6/468     | 0/71        | 0/198     | 0/31       | 0/197     | 0/290     | 0/12       | 9/2188    |
| mdr1-Asn86Phe   | 0.0%        | 0.0%      | 0.6%      | 0.0%       | 0.0%      | 0.0%      | 1.3%      | 0.0%        | 0.0%      | 0.0%       | 0.0%      | 0.0%      | 0.0%       | 0.4%      |
|                 | 0.0%-0.0%   | 0.0%-0.0% | 0.0%-1.2% | 0.0%-0.0%  | 0.0%-0.0% | 0.0%-0.0% | 0.4%-2.1% | 0.0%-0.0%   | 0.0%-0.0% | 0.0%-0.0%  | 0.0%-0.0% | 0.0%-0.0% | 0.0%-0.0%  | 0.2%-0.6% |
|                 | 0/130       | 0/139     | 1/595     | 0/48       | 0/160     | 0/144     | 0/486     | 0/124       | 2/261     | 0/38       | 0/260     | 0/356     | 0/26       | 3/2767    |
| mdr1-Asn86Tyr   | 0.0%        | 0.2%      | 0.0%      | 0.0%       | 0.0%      | 0.0%      | 0.0%      | 0.0%        | 0.8%      | 0.0%       | 0.0%      | 0.0%      | 0.0%       | 0.1%      |
|                 | 0.0%-0.0%   | 0.0%-0.0% | 0.0%-0.4% | 0.0%-0.0%  | 0.0%-0.0% | 0.0%-0.0% | 0.0%-0.0% | 0.0%-0.0%   | 0.0%-1.7% | 0.0%-0.0%  | 0.0%-0.0% | 0.0%-0.0% | 0.0%-0.0%  | 0.0%-0.2% |
|                 | 0/130       | 0/139     | 3/595     | 0/48       | 1/160     | 0/144     | 1/486     | 0/124       | 2/261     | 0/38       | 0/260     | 1/356     | 0/26       | 8/2767    |
| mdr1-Asp1246Tyr | 0.0%        | 0.0%      | 0.5%      | 0.0%       | 0.6%      | 0.0%      | 0.2%      | 0.0%        | 0.8%      | 0.0%       | 0.0%      | 0.3%      | 0.0%       | 0.3%      |
|                 | 0.0%-0.0%   | 0.0%-0.0% | 0.0%-1.0% | 0.0%-0.0%  | 0.0%-1.6% | 0.0%-0.0% | 0.0%-0.5% | 0.0%-0.0%   | 0.0%-1.7% | 0.0%-0.0%  | 0.0%-0.0% | 0.0%-0.7% | 0.0%-0.0%  | 0.1%-0.5% |
|                 | 0/5         | 0/68      | 12/415    | 4/63       | 3/129     | 2/56      | 14/487    | 0/36        | 0/169     | 0/19       | 1/126     | 16/314    | 1/8        | 53/1895   |
| mdr1-Asp543Gly  | 0.0%        | 0.0%      | 2.9%      | 6.3%       | 2.3%      | 3.6%      | 2.9%      | 0.0%        | 0.0%      | 0.0%       | 0.8%      | 5.1%      | 12.5%      | 2.8%      |
|                 | 0.0%-0.0%   | 0.0%-0.0% | 1.5%-4.2% | 1.3%-11.4% | 0.1%-4.5% | 0.0%-7.7% | 1.6%-4.1% | 0.0%-0.0%   | 0.0%-0.0% | 0.0%-0.0%  | 0.0%-2.1% | 3.1%-7.1% | 0.0%-31.7% | 2.2%-3.4% |
|                 | 0/96        | 0/115     | 0/567     | 0/45       | 1/143     | 0/118     | 2/477     | 0/103       | 0/222     | 0/28       | 0/229     | 0/305     | 0/15       | 3/2463    |
| mdr1-Asp642Asn  | 0.0%        | 0.0%      | 0.0%      | 0.4%       | 0.7%      | 0.0%      | 0.4%      | 0.0%        | 0.0%      | 0.0%       | 0.0%      | 0.0%      | 0.0%       | 0.1%      |
|                 | 0.0%-0.0%   | 0.0%-0.0% | 0.0%-0.0% | 0.0%-0.0%  | 0.0%-1.8% | 0.0%-0.0% | 0.0%-0.9% | 0.0%-0.0%   | 0.0%-0.0% | 0.0%-0.0%  | 0.0%-0.0% | 0.0%-0.0% | 0.0%-0.0%  | 0.0%-0.2% |
|                 | 0/56        | 2/94      | 0/497     | 0/47       | 0/136     | 0/91      | 4/468     | 0/71        | 1/198     | 0/31       | 2/197     | 12/290    | 0/12       | 21/2188   |
| mdr1-Asp650Asn  | 0.0%        | 2.1%      | 0.0%      | 0.0%       | 0.0%      | 0.0%      | 0.9%      | 0.0%        | 0.5%      | 0.0%       | 1.0%      | 4.1%      | 0.0%       | 1.0%      |
|                 | 0.0%-0.0%   | 0.0%-4.6% | 0.0%-0.0% | 0.0%-0.0%  | 0.0%-0.0% | 0.0%-0.0% | 0.2%-1.6% | 0.0%-0.0%   | 0.0%-1.3% | 0.0%-0.0%  | 0.0%-2.2% | 2.2%-6.1% | 0.0%-0.0%  | 0.6%-1.3% |
|                 | 0/56        | 1/94      | 8/497     | 3/47       | 3/136     | 3/91      | 24/468    | 2/71        | 5/198     | 2/31       | 5/197     | 8/290     | 0/12       | 64/2188   |
| mdr1-Asp651Asn  | 0.0%        | 1.1%      | 1.6%      | 6.4%       | 2.2%      | 3.3%      | 5.1%      | 2.8%        | 2.5%      | 6.5%       | 2.5%      | 2.8%      | 0.0%       | 2.9%      |
|                 | 0.0%-0.0%   | 0.0%-2.8% | 0.7%-2.5% | 0.5%-12.2% | 0.1%-4.3% | 0.2%-6.4% | 3.5%-6.8% | 0.0%-6.0%   | 0.7%-4.4% | 0.0%-13.7% | 0.7%-4.4% | 1.2%-4.3% | 0.0%-0.0%  | 2.3%-3.5% |
|                 | 1/56        | 0/94      | 16/497    | 2/47       | 3/136     | 0/91      | 35/468    | 1/71        | 2/198     | 0/31       | 4/197     | 20/290    | 0/12       | 84/2188   |
| mdr1-Asp651Tyr  | 1.8%        | 0.0%      | 3.2%      | 4.3%       | 2.2%      | 0.0%      | 7.5%      | 1.4%        | 1.0%      | 0.0%       | 2.0%      | 6.9%      | 0.0%       | 3.8%      |
|                 | 0.0%-4.7%   | 0.0%-0.0% | 1.9%-4.5% | 0.0%-9.1%  | 0.1%-4.3% | 0.0%-0.0% | 5.5%-9.5% | 0.0%-3.7%   | 0.0%-2.2% | 0.0%-0.0%  | 0.4%-3.7% | 4.4%-9.3% | 0.0%-0.0%  | 3.2%-4.5% |
|                 | 0/56        | 0/94      | 0/497     | 2/47       | 0/136     | 0/91      | 1/468     | 0/71        | 0/198     | 0/31       | 0/197     | 1/290     | 0/12       | 4/2188    |
| mdr1-Gln1198Lys | 0.0%        | 0.0%      | 0.0%      | 4.3%       | 0.0%      | 0.0%      | 0.2%      | 0.0%        | 0.0%      | 0.0%       | 0.0%      | 0.3%      | 0.0%       | 0.2%      |
|                 | 0.0%-0.0%   | 0.0%-0.0% | 0.0%-0.0% | 0.0%-9.1%  | 0.0%-0.0% | 0.0%-0.0% | 0.0%-0.6% | 0.0%-0.0%   | 0.0%-0.0% | 0.0%-0.0%  | 0.0%-0.0% | 0.0%-0.9% | 0.0%-0.0%  | 0.0%-0.3% |
|                 | no coverage | 0/65      | 2/339     | 0/53       | 0/105     | 0/50      | 3/462     | no coverage | 0/108     | 0/13       | 0/70      | 0/289     | 0/1        | 5/1555    |
| mdr1-Glu348Gly  | no coverage | 0.0%      | 0.6%      | 0.0%       | 0.0%      | 0.0%      | 0.6%      | no coverage | 0.0%      | 0.0%       | 0.0%      | 0.0%      | 0.0%       | 0.3%      |
|                 | no coverage | 0.0%-0.0% | 0.0%-1.3% | 0.0%-0.0%  | 0.0%-0.0% | 0.0%-0.0% | 0.0%-1.3% | no coverage | 0.0%-0.0% | 0.0%-0.0%  | 0.0%-0.0% | 0.0%-0.0% | 0.0%-0.0%  | 0.1%-0.6% |
|                 | 0/21        | 0/80      | 0/475     | 0/50       | 0/136     | 0/75      | 0/480     | 0/54        | 3/214     | 0/30       | 0/206     | 0/292     | 0/10       | 3/2123    |
| mdr1-Glu751Asp  | 0.0%        | 0.0%      | 0.0%      | 0.0%       | 0.0%      | 0.0%      | 0.0%      | 0.0%        | 1.4%      | 0.0%       | 0.0%      | 0.0%      | 0.0%       | 0.1%      |
|                 | 0.0%-0.0%   | 0.0%-0.0% | 0.0%-0.0% | 0.0%-0.0%  | 0.0%-0.0% | 0.0%-0.0% | 0.0%-0.0% | 0.0%-0.0%   | 0.1%-2.7% | 0.0%-0.0%  | 0.0%-0.0% | 0.0%-0.0% | 0.0%-0.0%  | 0.0%-0.3% |
|                 | 0/90        | 5/127     | 5/568     | 0/49       | 0/158     | 0/128     | 7/489     | 0/103       | 0/231     | 0/36       | 0/222     | 0/319     | 0/32       | 17/2552   |
| mdr1-Glu7Gln    | 0.0%        | 3.9%      | 0.9%      | 0.0%       | 0.0%      | 0.0%      | 1.4%      | 0.0%        | 0.0%      | 0.0%       | 0.0%      | 0.0%      | 0.0%       | 0.7%      |
|                 | 0.0%-0.0%   | 1.1%-6.8% | 0.2%-1.5% | 0.0%-0.0%  | 0.0%-0.0% | 0.0%-0.0% | 0.5%-2.3% | 0.0%-0.0%   | 0.0%-0.0% | 0.0%-0.0%  | 0.0%-0.0% | 0.0%-0.0% | 0.0%-0.0%  | 0.4%-0.9% |
|                 | 0/24        | 0/70      | 1/408     | 0/62       | 0/141     | 0/64      | 7/498     | 0/13        | 1/187     | 0/30       | 1/119     | 1/315     | 1/20       | 12/1951   |
| mdr1-Gly968Ala  | 0.0%        | 0.0%      | 0.2%      | 0.0%       | 0.0%      | 0.0%      | 1.4%      | 0.0%        | 0.5%      | 0.0%       | 0.8%      | 0.3%      | 5.0%       | 0.6%      |
|                 | 0.0%-0.0%   | 0.0%-0.0% | 0.0%-0.6% | 0.0%-0.0%  | 0.0%-0.0% | 0.0%-0.0% | 0.5%-2.3% | 0.0%-0.0%   | 0.0%-1.4% | 0.0%-0.0%  | 0.0%-2.2% | 0.0%-0.8% | 0.0%-13.0% | 0.3%-0.9% |
|                 | 0/115       | 0/138     | 0/577     | 0/72       | 0/176     | 0/148     | 0/526     | 1/149       | 1/267     | 0/54       | 0/263     | 2/381     | 0/46       | 4/2912    |
| mdr1-Gly968Ala  | 0.0%        | 0.0%      | 0.0%      | 0.0%       | 0.0%      | 0.0%      | 0.0%      | 0.7%        | 0.4%      | 0.0%       | 0.0%      | 0.5%      | 0.0%       | 0.1%      |
|                 | 0.0%-0.0%   | 0.0%-0.0% | 0.0%-0.0% | 0.0%-0.0%  | 0.0%-0.0% | 0.0%-0.0% | 0.0%-0.0% | 0.0%-1.8%   | 0.0%-1.0% | 0.0%-0.0%  | 0.0%-0.0% | 0.0%-1.1% | 0.0%-0.0%  | 0.0%-0.3% |

|                   |             |             |             |             |             |             |             |             |             |             |             |             |             |             |
|-------------------|-------------|-------------|-------------|-------------|-------------|-------------|-------------|-------------|-------------|-------------|-------------|-------------|-------------|-------------|
| mdr1-Ile839Val    | 0/7         | 0/71        | 7/407       | 0/47        | 0/134       | 0/63        | 7/477       | 0/38        | 0/184       | 0/28        | 3/142       | 5/291       | 0/13        | 22/1902     |
|                   | 0.0%        | 0.0%        | 1.7%        | 0.0%        | 0.0%        | 0.0%        | 1.5%        | 0.0%        | 0.0%        | 0.0%        | 2.1%        | 1.7%        | 0.0%        | 1.2%        |
|                   | 0.0%-0.0%   | 0.0%-0.0%   | 0.7%-2.8%   | 0.0%-0.0%   | 0.0%-0.0%   | 0.0%-0.0%   | 0.6%-2.4%   | 0.0%-0.0%   | 0.0%-0.0%   | 0.0%-0.0%   | 0.0%-0.0%   | 0.1%-4.1%   | 0.5%-3.0%   | 0.0%-0.0%   |
| mdr1-Leu429Phe    | 0/55        | 1/91        | 0/460       | 0/50        | 1/152       | 2/75        | 0/489       | 0/67        | 0/213       | 0/40        | 0/186       | 1/306       | 0/29        | 5/2213      |
|                   | 0.0%        | 1.1%        | 0.0%        | 0.0%        | 0.7%        | 2.7%        | 0.0%        | 0.0%        | 0.0%        | 0.0%        | 0.0%        | 0.3%        | 0.0%        | 0.2%        |
|                   | 0.0%-0.0%   | 0.0%-2.9%   | 0.0%-0.0%   | 0.0%-0.0%   | 0.0%-1.7%   | 0.0%-5.7%   | 0.0%-0.0%   | 0.0%-0.0%   | 0.0%-0.0%   | 0.0%-0.0%   | 0.0%-0.0%   | 0.0%-0.9%   | 0.0%-0.0%   | 0.1%-0.4%   |
| mdr1-Leu836Phe    | 0/7         | 0/71        | 0/407       | 0/47        | 0/134       | 0/63        | 0/477       | 0/38        | 0/184       | 0/28        | 0/142       | 3/291       | 0/13        | 3/1902      |
|                   | 0.0%        | 0.0%        | 0.0%        | 0.0%        | 0.0%        | 0.0%        | 0.0%        | 0.0%        | 0.0%        | 0.0%        | 0.0%        | 1.0%        | 0.0%        | 0.2%        |
|                   | 0.0%-0.0%   | 0.0%-0.0%   | 0.0%-0.0%   | 0.0%-0.0%   | 0.0%-0.0%   | 0.0%-0.0%   | 0.0%-0.0%   | 0.0%-0.0%   | 0.0%-0.0%   | 0.0%-0.0%   | 0.0%-0.0%   | 0.1%-2.0%   | 0.0%-0.0%   | 0.0%-0.3%   |
| mdr1-Lys34Arg     | no coverage | 0/19        | 1/168       | 0/38        | 0/23        | 0/11        | 3/382       | no coverage | 0/62        | 0/9         | 0/28        | 1/241       | no coverage | 5/981       |
|                   | no coverage | 0.0%        | 0.6%        | 0.0%        | 0.0%        | 0.0%        | 0.8%        | no coverage | 0.0%        | 0.0%        | 0.0%        | 0.4%        | no coverage | 0.5%        |
|                   | no coverage | 0.0%-0.0%   | 0.0%-1.6%   | 0.0%-0.0%   | 0.0%-0.0%   | 0.0%-0.0%   | 0.0%-1.5%   | no coverage | 0.0%-0.0%   | 0.0%-0.0%   | 0.0%-0.0%   | 0.0%-1.1%   | no coverage | 0.1%-0.9%   |
| mdr1-Met239Ile    | 0/25        | 0/90        | 2/478       | 0/59        | 0/161       | 0/78        | 1/508       | 0/67        | 0/216       | 0/43        | 0/195       | 0/313       | 0/30        | 3/2263      |
|                   | 0.0%        | 0.0%        | 0.4%        | 0.0%        | 0.2%        | 0.0%        | 0.2%        | 0.0%        | 0.0%        | 0.0%        | 0.0%        | 0.0%        | 0.0%        | 0.1%        |
|                   | 0.0%-0.0%   | 0.0%-0.0%   | 0.0%-0.9%   | 0.0%-0.0%   | 0.0%-0.0%   | 0.0%-0.0%   | 0.0%-0.5%   | 0.0%-0.0%   | 0.0%-0.0%   | 0.0%-0.0%   | 0.0%-0.0%   | 0.0%-0.0%   | 0.0%-0.0%   | 0.0%-0.3%   |
| mdr1-Phe1194Leu   | no coverage | 0/65        | 1/339       | 0/53        | 0/105       | 0/50        | 0/462       | no coverage | 0/108       | 0/13        | 0/70        | 2/289       | 0/1         | 3/1555      |
|                   | no coverage | 0.0%        | 0.3%        | 0.0%        | 0.0%        | 0.0%        | 0.0%        | no coverage | 0.0%        | 0.0%        | 0.0%        | 0.7%        | 0.0%        | 0.2%        |
|                   | no coverage | 0.0%-0.0%   | 0.0%-0.8%   | 0.0%-0.0%   | 0.0%-0.0%   | 0.0%-0.0%   | 0.0%-0.0%   | no coverage | 0.0%-0.0%   | 0.0%-0.0%   | 0.0%-0.0%   | 0.0%-1.5%   | 0.0%-0.0%   | 0.0%-0.4%   |
| mdr1-Phe938Tyr    | 2/69        | 1/107       | 10/484      | 0/48        | 1/144       | 0/105       | 51/488      | 0/107       | 0/200       | 0/34        | 0/178       | 11/310      | 0/27        | 76/2301     |
|                   | 2.9%        | 0.9%        | 2.1%        | 0.0%        | 0.7%        | 0.0%        | 10.5%       | 0.0%        | 0.0%        | 0.0%        | 0.0%        | 3.5%        | 0.0%        | 3.3%        |
|                   | 0.0%-6.2%   | 0.0%-2.5%   | 1.0%-3.1%   | 0.0%-0.0%   | 0.0%-1.8%   | 0.0%-0.0%   | 8.2%-12.7%  | 0.0%-0.0%   | 0.0%-0.0%   | 0.0%-0.0%   | 0.0%-0.0%   | 1.8%-5.3%   | 0.0%-0.0%   | 2.7%-3.9%   |
| mdr1-Thr199Ser    | 1/125       | 0/164       | 5/629       | 1/60        | 0/188       | 0/165       | 5/525       | 0/155       | 0/272       | 0/55        | 0/288       | 3/380       | 0/42        | 15/3048     |
|                   | 0.8%        | 0.0%        | 0.8%        | 1.7%        | 0.0%        | 0.0%        | 1.0%        | 0.0%        | 0.0%        | 0.0%        | 0.0%        | 0.8%        | 0.0%        | 0.5%        |
|                   | 0.0%-2.1%   | 0.0%-0.0%   | 0.2%-1.4%   | 0.0%-4.4%   | 0.0%-0.0%   | 0.0%-0.0%   | 0.3%-1.6%   | 0.0%-0.0%   | 0.0%-0.0%   | 0.0%-0.0%   | 0.0%-0.0%   | 0.0%-1.5%   | 0.0%-0.0%   | 0.3%-0.7%   |
| mdr1-Tyr1197Asn   | no coverage | 0/65        | 1/339       | 0/53        | 0/105       | 0/50        | 0/462       | no coverage | 2/108       | 0/13        | 0/70        | 0/289       | 0/1         | 3/1555      |
|                   | no coverage | 0.0%        | 0.3%        | 0.0%        | 0.0%        | 0.0%        | 0.0%        | no coverage | 1.9%        | 0.0%        | 0.0%        | 0.0%        | 0.0%        | 0.2%        |
|                   | no coverage | 0.0%-0.0%   | 0.0%-0.8%   | 0.0%-0.0%   | 0.0%-0.0%   | 0.0%-0.0%   | 0.0%-0.0%   | no coverage | 0.0%-4.0%   | 0.0%-0.0%   | 0.0%-0.0%   | 0.0%-0.0%   | 0.0%-0.0%   | 0.0%-0.4%   |
| mdr1-Tyr184Phe    | 65/125      | 79/164      | 279/629     | 19/60       | 116/188     | 101/165     | 336/525     | 88/155      | 134/272     | 33/55       | 113/288     | 209/380     | 15/42       | 1587/3048   |
|                   | 52.0%       | 48.2%       | 44.4%       | 31.7%       | 61.7%       | 61.2%       | 64.0%       | 56.8%       | 49.3%       | 60.0%       | 39.2%       | 55.0%       | 35.7%       | 52.1%       |
|                   | 44.6%-59.4% | 41.8%-54.6% | 41.1%-47.6% | 21.8%-41.5% | 55.9%-67.5% | 55.0%-67.5% | 60.6%-67.4% | 50.2%-63.3% | 44.3%-54.3% | 49.1%-70.9% | 34.5%-44.0% | 50.8%-59.2% | 23.6%-47.9% | 50.6%-53.6% |
| mdr1-Val533Ile    | 0/96        | 0/115       | 0/567       | 0/45        | 0/143       | 0/118       | 2/477       | 0/103       | 0/222       | 0/28        | 0/229       | 1/305       | 0/15        | 3/2463      |
|                   | 0.0%        | 0.0%        | 0.0%        | 0.0%        | 0.0%        | 0.0%        | 0.4%        | 0.0%        | 0.0%        | 0.0%        | 0.0%        | 0.3%        | 0.0%        | 0.1%        |
|                   | 0.0%-0.0%   | 0.0%-0.0%   | 0.0%-0.0%   | 0.0%-0.0%   | 0.0%-0.0%   | 0.0%-0.0%   | 0.0%-0.9%   | 0.0%-0.0%   | 0.0%-0.0%   | 0.0%-0.0%   | 0.0%-0.0%   | 0.0%-0.9%   | 0.0%-0.0%   | 0.0%-0.2%   |
| mdr2-Ile492Val    | 1/3         | 25/65       | 139/254     | 0/2         | 47/119      | 16/52       | 66/118      | 2/17        | 53/127      | 7/14        | 39/93       | 9/19        | 0/3         | 404/886     |
|                   | 33.3%       | 38.5%       | 54.7%       | 0.0%        | 39.5%       | 30.8%       | 55.9%       | 11.8%       | 41.7%       | 50.0%       | 41.9%       | 47.4%       | 0.0%        | 45.6%       |
|                   | 0.0%-78.1%  | 28.5%-48.4% | 49.6%-59.9% | 0.0%-0.0%   | 32.1%-46.9% | 20.2%-41.3% | 48.4%-63.4% | 0.0%-24.6%  | 34.5%-48.9% | 28.0%-72.0% | 33.5%-50.4% | 28.5%-66.2% | 0.0%-0.0%   | 42.8%-48.4% |
| pfdpap1-Ala118Ser | 0/95        | 0/136       | 1/517       | 0/11        | 0/158       | 0/143       | 2/166       | 0/102       | 3/271       | 0/38        | 0/314       | 0/81        | 0/22        | 6/2054      |
|                   | 0.0%        | 0.0%        | 0.2%        | 0.0%        | 0.0%        | 0.0%        | 1.2%        | 0.0%        | 1.1%        | 0.0%        | 0.0%        | 0.0%        | 0.0%        | 0.3%        |
|                   | 0.0%-0.0%   | 0.0%-0.0%   | 0.0%-0.5%   | 0.0%-0.0%   | 0.0%-0.0%   | 0.0%-0.0%   | 0.0%-2.6%   | 0.0%-0.0%   | 0.1%-2.2%   | 0.0%-0.0%   | 0.0%-0.0%   | 0.0%-0.0%   | 0.0%-0.0%   | 0.1%-0.5%   |
| pfdpap1-Ala2Thr   | 0/2         | 24/67       | 108/258     | 1/2         | 40/119      | 22/53       | 47/118      | 8/19        | 29/126      | 8/22        | 36/97       | 8/17        | 3/6         | 334/906     |
|                   | 0.0%        | 35.8%       | 41.9%       | 50.0%       | 33.6%       | 41.5%       | 39.8%       | 42.1%       | 23.0%       | 36.4%       | 37.1%       | 47.1%       | 50.0%       | 36.9%       |
|                   | 0.0%-0.0%   | 26.2%-45.5% | 36.8%-46.9% | 0.0%-100.0% | 26.5%-40.7% | 30.4%-52.6% | 32.4%-47.2% | 23.5%-60.7% | 16.8%-29.2% | 19.5%-53.2% | 29.0%-45.2% | 27.1%-67.0% | 16.4%-83.6% | 34.2%-39.5% |
| pfdpap1-Asn144Thr | 0/70        | 0/119       | 1/458       | 0/5         | 0/132       | 0/110       | 0/138       | 1/86        | 0/224       | 0/28        | 2/235       | 0/52        | 0/10        | 4/1667      |
|                   | 0.0%        | 0.0%        | 0.2%        | 0.0%        | 0.0%        | 0.0%        | 0.0%        | 1.2%        | 0.0%        | 0.0%        | 0.9%        | 0.0%        | 0.0%        | 0.2%        |
|                   | 0.0%-0.0%   | 0.0%-0.0%   | 0.0%-0.6%   | 0.0%-0.0%   | 0.0%-0.0%   | 0.0%-0.0%   | 0.0%-0.0%   | 0.0%-3.1%   | 0.0%-0.0%   | 0.0%-0.0%   | 0.0%-1.8%   | 0.0%-0.0%   | 0.0%-0.0%   | 0.0%-0.4%   |
| pfdpap1-Asp295Ala | 8/16        | 17/52       | 64/239      | no coverage | 23/70       | 14/39       | 44/97       | 15/59       | 27/74       | 3/11        | 24/83       | 3/14        | 1/2         | 243/756     |
|                   | 50.0%       | 32.7%       | 26.8%       | no coverage | 32.9%       | 35.9%       | 45.4%       | 25.4%       | 36.5%       | 27.3%       | 28.9%       | 21.4%       | 50.0%       | 32.1%       |
|                   | 29.4%-70.6% | 22.0%-43.4% | 22.1%-31.5% | no coverage | 23.6%-42.1% | 23.3%-48.5% | 37.0%-53.7% | 16.1%-34.7% | 27.3%-45.7% | 5.2%-49.4%  | 20.7%-37.1% | 3.4%-39.5%  | 0.0%-100.0% | 29.3%-34.9% |
| pfdpap1-Glu497Lys | 0/67        | 0/105       | 0/434       | 0/1         | 0/112       | 0/95        | 0/121       | 0/88        | 0/188       | 0/21        | 4/218       | 0/61        | 0/4         | 4/1515      |
|                   | 0.0%        | 0.0%        | 0.0%        | 0.0%        | 0.0%        | 0.0%        | 0.0%        | 0.0%        | 0.0%        | 0.0%        | 1.8%        | 0.0%        | 0.0%        | 0.3%        |

|                   |             |            |             |             |            |             |             |             |            |            |            |            |            |             |
|-------------------|-------------|------------|-------------|-------------|------------|-------------|-------------|-------------|------------|------------|------------|------------|------------|-------------|
| pfdpap1-Glu596Lys | 0.0%-0.0%   | 0.0%-0.0%  | 0.0%-0.0%   | 0.0%-0.0%   | 0.0%-0.0%  | 0.0%-0.0%   | 0.0%-0.0%   | 0.0%-0.0%   | 0.0%-0.0%  | 0.0%-0.0%  | 0.3%-3.3%  | 0.0%-0.0%  | 0.0%-0.0%  | 0.0%-0.5%   |
|                   | 0/46        | 0/90       | 0/420       | 0/7         | 0/137      | 0/83        | 0/141       | 0/81        | 3/231      | 0/36       | 0/243      | 0/39       | 0/9        | 3/1563      |
|                   | 0.0%        | 0.0%       | 0.0%        | 0.0%        | 0.0%       | 0.0%        | 0.0%        | 0.0%        | 1.3%       | 0.0%       | 0.0%       | 0.0%       | 0.0%       | 0.2%        |
| pfdpap1-Glu692Gln | 0.0%-0.0%   | 0.0%-0.0%  | 0.0%-0.0%   | 0.0%-0.0%   | 0.0%-0.0%  | 0.0%-0.0%   | 0.0%-0.0%   | 0.0%-0.0%   | 0.1%-2.5%  | 0.0%-0.0%  | 0.0%-0.0%  | 0.0%-0.0%  | 0.0%-0.4%  | 0.0%-0.4%   |
|                   | no coverage | 7/57       | 22/236      | no coverage | 13/109     | 7/48        | 14/113      | no coverage | 4/89       | 0/24       | 6/67       | 3/13       | 0/2        | 76/758      |
|                   | no coverage | 12.3%      | 9.3%        | no coverage | 11.9%      | 14.6%       | 12.4%       | no coverage | 4.5%       | 0.0%       | 9.0%       | 23.1%      | 0.0%       | 10.0%       |
| pfdpap1-Glu692Lys | no coverage | 5.1%-19.4% | 6.2%-12.4%  | no coverage | 6.8%-17.0% | 6.2%-23.0%  | 7.3%-17.5%  | no coverage | 0.9%-8.1%  | 0.0%-0.0%  | 3.2%-14.7% | 3.9%-42.3% | 0.0%-0.0%  | 8.2%-11.8%  |
|                   | no coverage | 0/57       | 11/236      | no coverage | 2/109      | 0/48        | 8/113       | no coverage | 5/89       | 0/24       | 0/67       | 0/13       | 0/2        | 26/758      |
|                   | no coverage | 0.0%       | 4.7%        | no coverage | 1.8%       | 0.0%        | 7.1%        | no coverage | 5.6%       | 0.0%       | 0.0%       | 0.0%       | 0.0%       | 3.4%        |
| pfdpap1-Ile636Met | no coverage | 0.0%-0.0%  | 2.4%-6.9%   | no coverage | 0.0%-3.9%  | 0.0%-0.0%   | 3.1%-11.0%  | no coverage | 1.6%-9.6%  | 0.0%-0.0%  | 0.0%-0.0%  | 0.0%-0.0%  | 0.0%-0.0%  | 2.3%-4.5%   |
|                   | 1/17        | 0/66       | 0/355       | 0/2         | 0/117      | 0/63        | 1/123       | 0/65        | 1/189      | 0/30       | 0/160      | 1/26       | 0/4        | 4/1217      |
|                   | 5.9%        | 0.0%       | 0.0%        | 0.0%        | 0.0%       | 0.0%        | 0.8%        | 0.0%        | 0.5%       | 0.0%       | 0.0%       | 3.8%       | 0.0%       | 0.3%        |
| pfdpap1-Ile689Lys | 0.0%-15.3%  | 0.0%-0.0%  | 0.0%-0.0%   | 0.0%-0.0%   | 0.0%-0.0%  | 0.0%-0.0%   | 0.0%-2.1%   | 0.0%-0.0%   | 0.0%-1.4%  | 0.0%-0.0%  | 0.0%-0.0%  | 0.0%-10.0% | 0.0%-0.0%  | 0.1%-0.6%   |
|                   | no coverage | 10/57      | 40/236      | no coverage | 13/109     | 10/48       | 26/113      | no coverage | 10/89      | 1/24       | 3/67       | 2/13       | 0/2        | 115/758     |
|                   | no coverage | 17.5%      | 16.9%       | no coverage | 11.9%      | 20.8%       | 23.0%       | no coverage | 11.2%      | 4.2%       | 4.5%       | 15.4%      | 0.0%       | 15.2%       |
| pfdpap1-Leu218Val | no coverage | 9.3%-25.8% | 12.9%-21.0% | no coverage | 6.8%-17.0% | 11.2%-30.5% | 16.5%-29.5% | no coverage | 5.7%-16.7% | 0.0%-10.9% | 0.3%-8.6%  | 0.0%-31.8% | 0.0%-0.0%  | 13.0%-17.3% |
|                   | 0/6         | 2/71       | 3/298       | 0/5         | 1/135      | 0/65        | 0/130       | 2/25        | 5/188      | 0/32       | 4/134      | 0/19       | 0/14       | 17/1122     |
|                   | 0.0%        | 2.8%       | 1.0%        | 0.0%        | 0.7%       | 0.0%        | 0.0%        | 8.0%        | 2.7%       | 0.0%       | 3.0%       | 0.0%       | 0.0%       | 1.5%        |
| pfdpap1-Leu690Asn | 0.0%-0.0%   | 0.0%-6.0%  | 0.1%-2.0%   | 0.0%-0.0%   | 0.0%-2.0%  | 0.0%-0.0%   | 0.0%-0.0%   | 0.0%-16.9%  | 0.7%-4.6%  | 0.0%-0.0%  | 0.6%-5.4%  | 0.0%-0.0%  | 0.0%-0.0%  | 0.9%-2.1%   |
|                   | no coverage | 0/57       | 1/236       | no coverage | 1/109      | 1/48        | 1/113       | no coverage | 0/89       | 0/24       | 0/67       | 0/13       | 0/2        | 4/758       |
|                   | no coverage | 0.0%       | 0.4%        | no coverage | 0.9%       | 2.1%        | 0.9%        | no coverage | 0.0%       | 0.0%       | 0.0%       | 0.0%       | 0.0%       | 0.5%        |
| pfdpap1-Leu690His | no coverage | 0.0%-0.0%  | 0.0%-1.1%   | no coverage | 0.0%-2.4%  | 0.0%-5.5%   | 0.0%-2.3%   | no coverage | 0.0%-0.0%  | 0.0%-0.0%  | 0.0%-0.0%  | 0.0%-0.0%  | 0.0%-0.0%  | 0.1%-1.0%   |
|                   | no coverage | 2/57       | 0/236       | no coverage | 1/109      | 0/48        | 2/113       | no coverage | 1/89       | 1/24       | 1/67       | 0/13       | 0/2        | 8/758       |
|                   | no coverage | 3.5%       | 0.0%        | no coverage | 0.9%       | 0.0%        | 1.8%        | no coverage | 1.1%       | 4.2%       | 1.5%       | 0.0%       | 0.0%       | 1.1%        |
| pfdpap1-Leu690Ile | no coverage | 0.0%-7.5%  | 0.0%-0.0%   | no coverage | 0.0%-2.4%  | 0.0%-0.0%   | 0.0%-3.8%   | no coverage | 0.0%-3.0%  | 0.0%-10.9% | 0.0%-3.9%  | 0.0%-0.0%  | 0.0%-0.0%  | 0.4%-1.7%   |
|                   | no coverage | 5/57       | 32/236      | no coverage | 12/109     | 4/48        | 19/113      | no coverage | 13/89      | 3/24       | 5/67       | 3/13       | 0/2        | 96/758      |
|                   | no coverage | 8.8%       | 13.6%       | no coverage | 11.0%      | 8.3%        | 16.8%       | no coverage | 14.6%      | 12.5%      | 7.5%       | 23.1%      | 0.0%       | 12.7%       |
| pfdpap1-Leu691Phe | no coverage | 2.6%-14.9% | 9.9%-17.2%  | no coverage | 6.1%-15.9% | 1.8%-14.9%  | 11.0%-22.6% | no coverage | 8.4%-20.8% | 1.4%-23.6% | 2.2%-12.7% | 3.9%-42.3% | 0.0%-0.0%  | 10.7%-14.7% |
|                   | no coverage | 1/57       | 11/236      | no coverage | 1/109      | 1/48        | 6/113       | no coverage | 5/89       | 0/24       | 0/67       | 0/13       | 0/2        | 25/758      |
|                   | no coverage | 1.8%       | 4.7%        | no coverage | 0.9%       | 2.1%        | 5.3%        | no coverage | 5.6%       | 0.0%       | 0.0%       | 0.0%       | 0.0%       | 3.3%        |
| pfdpap1-Lys216Asn | no coverage | 0.0%-4.6%  | 2.4%-6.9%   | no coverage | 0.0%-2.4%  | 0.0%-5.5%   | 1.8%-8.8%   | no coverage | 1.6%-9.6%  | 0.0%-0.0%  | 0.0%-0.0%  | 0.0%-0.0%  | 0.0%-0.0%  | 2.2%-4.4%   |
|                   | 0/6         | 2/71       | 3/298       | 0/5         | 3/135      | 3/65        | 1/130       | 0/25        | 2/188      | 0/32       | 0/134      | 0/19       | 1/14       | 15/1122     |
|                   | 0.0%        | 2.8%       | 1.0%        | 0.0%        | 2.2%       | 4.6%        | 0.8%        | 0.0%        | 1.1%       | 0.0%       | 0.0%       | 0.0%       | 7.1%       | 1.3%        |
| pfdpap1-Lys216Thr | 0.0%-0.0%   | 0.0%-6.0%  | 0.1%-2.0%   | 0.0%-0.0%   | 0.1%-4.3%  | 0.3%-8.9%   | 0.0%-2.0%   | 0.0%-0.0%   | 0.0%-2.3%  | 0.0%-0.0%  | 0.0%-0.0%  | 0.0%-0.0%  | 0.0%-18.5% | 0.8%-1.9%   |
|                   | 0/6         | 0/71       | 1/298       | 0/5         | 0/135      | 1/65        | 0/130       | 0/25        | 0/188      | 0/32       | 0/134      | 1/19       | 0/14       | 3/1122      |
|                   | 0.0%        | 0.0%       | 0.3%        | 0.0%        | 0.0%       | 1.5%        | 0.0%        | 0.0%        | 0.0%       | 0.0%       | 0.0%       | 5.3%       | 0.0%       | 0.3%        |
| pfdpap1-Pro161Leu | 0.0%-0.0%   | 0.0%-0.0%  | 0.0%-0.9%   | 0.0%-0.0%   | 0.0%-0.0%  | 0.0%-4.0%   | 0.0%-0.0%   | 0.0%-0.0%   | 0.0%-0.0%  | 0.0%-0.0%  | 0.0%-0.0%  | 0.0%-13.7% | 0.0%-0.0%  | 0.0%-0.5%   |
|                   | 0/82        | 4/126      | 0/484       | 0/8         | 1/150      | 1/120       | 1/156       | 0/97        | 0/259      | 0/34       | 2/282      | 0/61       | 0/16       | 9/1875      |
|                   | 0.0%        | 3.2%       | 0.0%        | 0.0%        | 0.7%       | 0.8%        | 0.6%        | 0.0%        | 0.0%       | 0.0%       | 0.7%       | 0.0%       | 0.0%       | 0.5%        |
| pfdpap1-Ser292Tyr | 0.0%-0.0%   | 0.6%-5.7%  | 0.0%-0.0%   | 0.0%-0.0%   | 0.0%-1.8%  | 0.0%-2.2%   | 0.0%-1.7%   | 0.0%-0.0%   | 0.0%-0.0%  | 0.0%-0.0%  | 0.0%-1.5%  | 0.0%-0.0%  | 0.0%-0.0%  | 0.2%-0.7%   |
|                   | 0/16        | 2/52       | 8/239       | no coverage | 3/70       | 3/39        | 7/97        | 2/59        | 0/74       | 0/11       | 3/83       | 0/14       | 0/2        | 28/756      |
|                   | 0.0%        | 3.8%       | 3.3%        | no coverage | 4.3%       | 7.7%        | 7.2%        | 3.4%        | 0.0%       | 0.0%       | 3.6%       | 0.0%       | 0.0%       | 3.7%        |
| pfdpap1-Ser509Asn | 0.0%-0.0%   | 0.0%-8.2%  | 1.4%-5.3%   | no coverage | 0.3%-8.3%  | 0.7%-14.7%  | 2.9%-11.5%  | 0.0%-7.3%   | 0.0%-0.0%  | 0.0%-0.0%  | 0.2%-7.0%  | 0.0%-0.0%  | 0.0%-0.0%  | 2.6%-4.8%   |
|                   | 0/67        | 0/105      | 0/434       | 0/1         | 1/112      | 0/95        | 1/121       | 2/88        | 2/188      | 0/21       | 0/218      | 0/61       | 0/4        | 6/1515      |
|                   | 0.0%        | 0.0%       | 0.0%        | 0.0%        | 0.9%       | 0.0%        | 0.9%        | 2.3%        | 1.1%       | 0.0%       | 0.0%       | 0.0%       | 0.0%       | 0.4%        |
| pfdpap1-Thr222Ile | 0.0%-0.0%   | 0.0%-0.0%  | 0.0%-0.0%   | 0.0%-0.0%   | 0.0%-2.4%  | 0.0%-0.0%   | 0.0%-2.2%   | 0.0%-4.9%   | 0.0%-2.3%  | 0.0%-0.0%  | 0.0%-0.0%  | 0.0%-0.0%  | 0.0%-0.0%  | 0.1%-0.7%   |
|                   | no coverage | 1/66       | 0/248       | 0/2         | 2/114      | 1/55        | 2/114       | 0/2         | 1/131      | 0/23       | 0/98       | 0/16       | 0/2        | 7/871       |
|                   | no coverage | 1.5%       | 0.0%        | 0.0%        | 1.8%       | 1.8%        | 1.8%        | 0.0%        | 0.8%       | 0.0%       | 0.0%       | 0.0%       | 0.0%       | 0.8%        |
| pfdpap1-Thr327Ser | no coverage | 0.0%-4.0%  | 0.0%-0.0%   | 0.0%-0.0%   | 0.0%-3.8%  | 0.0%-4.8%   | 0.0%-3.8%   | 0.0%-0.0%   | 0.0%-2.0%  | 0.0%-0.0%  | 0.0%-0.0%  | 0.0%-0.0%  | 0.0%-0.0%  | 0.3%-1.3%   |
|                   | 1/54        | 0/92       | 0/389       | 0/9         | 1/128      | 1/87        | 1/128       | 0/87        | 0/179      | 0/30       | 2/186      | 1/35       | 0/12       | 7/1416      |



|                   |           |           |           |             |           |            |           |           |           |           |           |           |           |           |
|-------------------|-----------|-----------|-----------|-------------|-----------|------------|-----------|-----------|-----------|-----------|-----------|-----------|-----------|-----------|
|                   | 1.9%      | 0.0%      | 0.0%      | 0.0%        | 0.8%      | 1.1%       | 0.8%      | 0.0%      | 0.0%      | 0.0%      | 1.1%      | 2.9%      | 0.0%      | 0.5%      |
|                   | 0.0%-4.9% | 0.0%-0.0% | 0.0%-0.0% | 0.0%-0.0%   | 0.0%-2.1% | 0.0%-3.0%  | 0.0%-2.1% | 0.0%-0.0% | 0.0%-0.0% | 0.0%-0.0% | 0.0%-2.3% | 0.0%-7.5% | 0.0%-0.0% | 0.2%-0.8% |
| pfdpap1-Val523Ile | 0/67      | 1/105     | 0/434     | 0/1         | 2/112     | 2/95       | 0/121     | 0/88      | 4/188     | 0/21      | 0/218     | 0/61      | 0/4       | 9/1515    |
|                   | 0.0%      | 1.0%      | 0.0%      | 0.0%        | 1.8%      | 2.1%       | 0.0%      | 0.0%      | 2.1%      | 0.0%      | 0.0%      | 0.0%      | 0.0%      | 0.6%      |
|                   | 0.0%-0.0% | 0.0%-2.5% | 0.0%-0.0% | 0.0%-0.0%   | 0.0%-3.8% | 0.0%-4.5%  | 0.0%-0.0% | 0.0%-0.0% | 0.4%-3.9% | 0.0%-0.0% | 0.0%-0.0% | 0.0%-0.0% | 0.0%-0.0% | 0.3%-0.9% |
| pph-Asp1147Asn    | 0/7       | 0/60      | 6/230     | no coverage | 2/96      | 0/50       | 1/103     | 0/24      | 2/155     | 0/24      | 0/101     | 0/17      | 0/2       | 11/869    |
|                   | 0.0%      | 0.0%      | 2.6%      | no coverage | 2.1%      | 0.0%       | 1.0%      | 0.0%      | 1.3%      | 0.0%      | 0.0%      | 0.0%      | 0.0%      | 1.3%      |
|                   | 0.0%-0.0% | 0.0%-0.0% | 0.9%-4.3% | no coverage | 0.0%-4.5% | 0.0%-0.0%  | 0.0%-2.6% | 0.0%-0.0% | 0.0%-2.8% | 0.0%-0.0% | 0.0%-0.0% | 0.0%-0.0% | 0.0%-0.0% | 0.6%-1.9% |
| pph-Glu1097Lys    | 0/7       | 3/60      | 0/230     | no coverage | 0/96      | 3/50       | 0/103     | 0/24      | 0/155     | 0/24      | 0/101     | 0/17      | 0/2       | 6/869     |
|                   | 0.0%      | 5.0%      | 0.0%      | no coverage | 0.0%      | 6.0%       | 0.0%      | 0.0%      | 0.0%      | 0.0%      | 0.0%      | 0.0%      | 0.0%      | 0.7%      |
|                   | 0.0%-0.0% | 0.4%-9.6% | 0.0%-0.0% | no coverage | 0.0%-0.0% | 0.5%-11.5% | 0.0%-0.0% | 0.0%-0.0% | 0.0%-0.0% | 0.0%-0.0% | 0.0%-0.0% | 0.0%-0.0% | 0.0%-0.0% | 0.2%-1.2% |
| pph-Met1146Lys    | 0/7       | 1/60      | 1/230     | no coverage | 0/96      | 0/50       | 2/103     | 0/24      | 0/155     | 0/24      | 0/101     | 0/17      | 0/2       | 4/869     |
|                   | 0.0%      | 1.7%      | 0.4%      | no coverage | 0.0%      | 0.0%       | 1.9%      | 0.0%      | 0.0%      | 0.0%      | 0.0%      | 0.0%      | 0.0%      | 0.5%      |
|                   | 0.0%-0.0% | 0.0%-4.4% | 0.0%-1.1% | no coverage | 0.0%-0.0% | 0.0%-0.0%  | 0.0%-4.2% | 0.0%-0.0% | 0.0%-0.0% | 0.0%-0.0% | 0.0%-0.0% | 0.0%-0.0% | 0.0%-0.0% | 0.1%-0.8% |
| pph-Ser1095Ile    | 0/7       | 0/60      | 0/230     | no coverage | 1/96      | 0/50       | 1/103     | 0/24      | 2/155     | 0/24      | 0/101     | 0/17      | 0/2       | 4/869     |
|                   | 0.0%      | 0.0%      | 0.0%      | no coverage | 1.0%      | 0.0%       | 1.0%      | 0.0%      | 1.3%      | 0.0%      | 0.0%      | 0.0%      | 0.0%      | 0.5%      |
|                   | 0.0%-0.0% | 0.0%-0.0% | 0.0%-0.0% | no coverage | 0.0%-2.7% | 0.0%-0.0%  | 0.0%-2.6% | 0.0%-0.0% | 0.0%-2.8% | 0.0%-0.0% | 0.0%-0.0% | 0.0%-0.0% | 0.0%-0.0% | 0.1%-0.8% |

## Study Regions

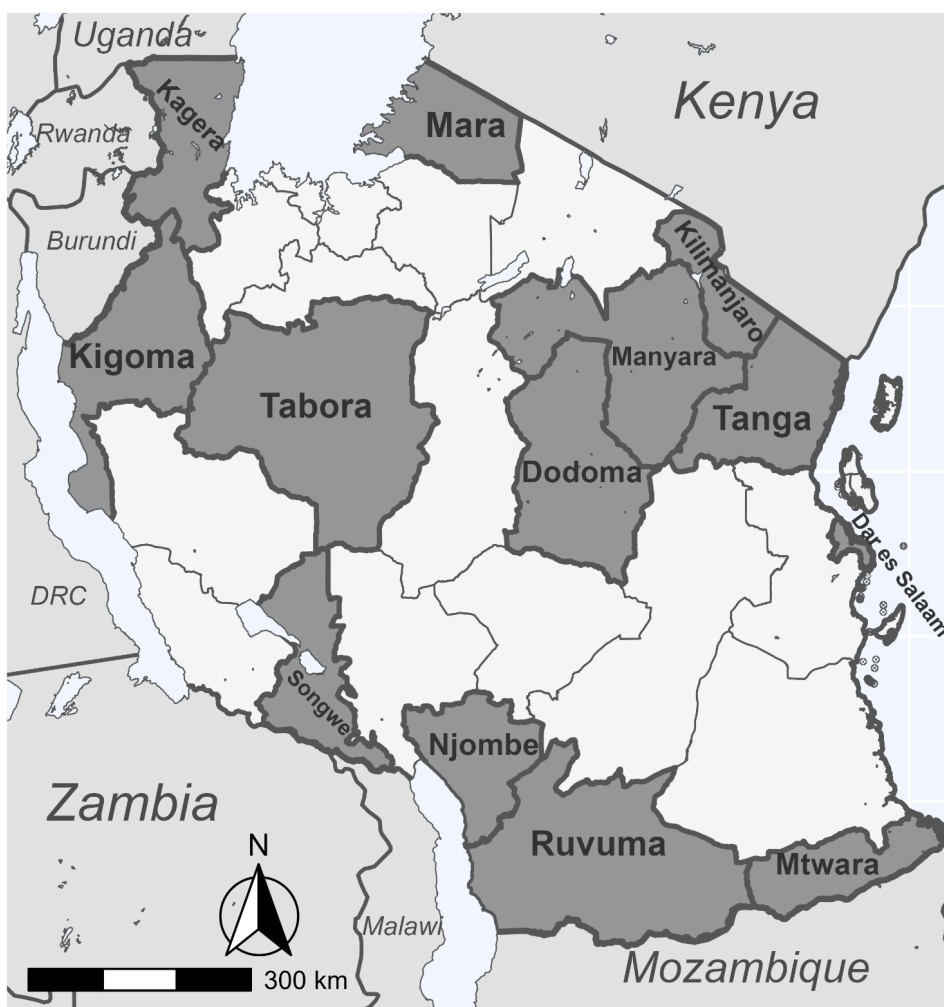

**Figure S1. Regions with sampling in the study.** The regions of Tanga, Ruvuma, and Kigoma involved community survey samples. The remaining regions involved sample collections in health facilities.

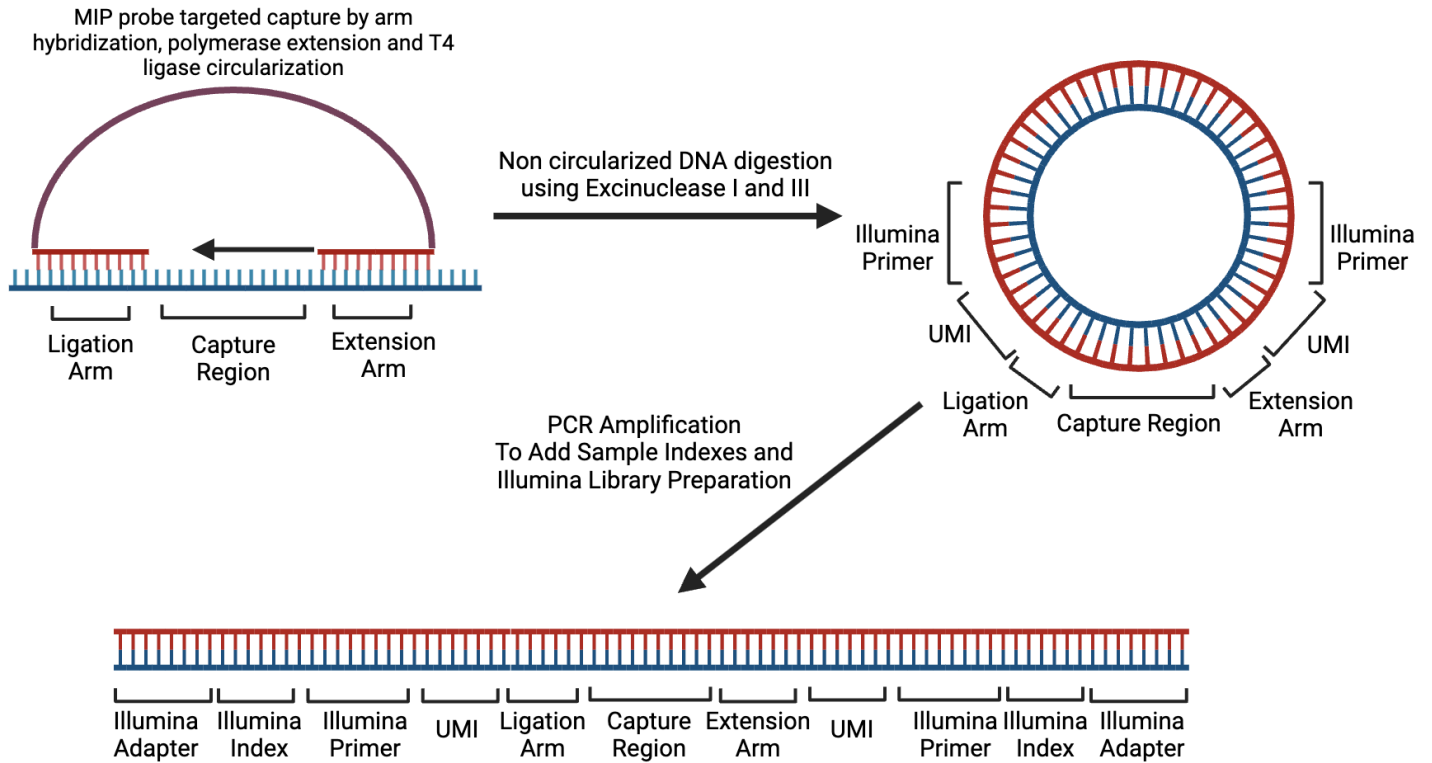

**Figure S2. Schematic of Molecular Inversion Probe Method.** UMI: Unique Molecular Identifier. The 3'-end of the molecular inversion probe ends in the extension arm where polymerase primes and extends while the 5' end of the MIP represents the ligation arm where after extension the circle is ligated closed. Both arms hybridized based on complementary sequence to the sequence flanking the target. Generated with Biorender academic license to University of North Carolina.

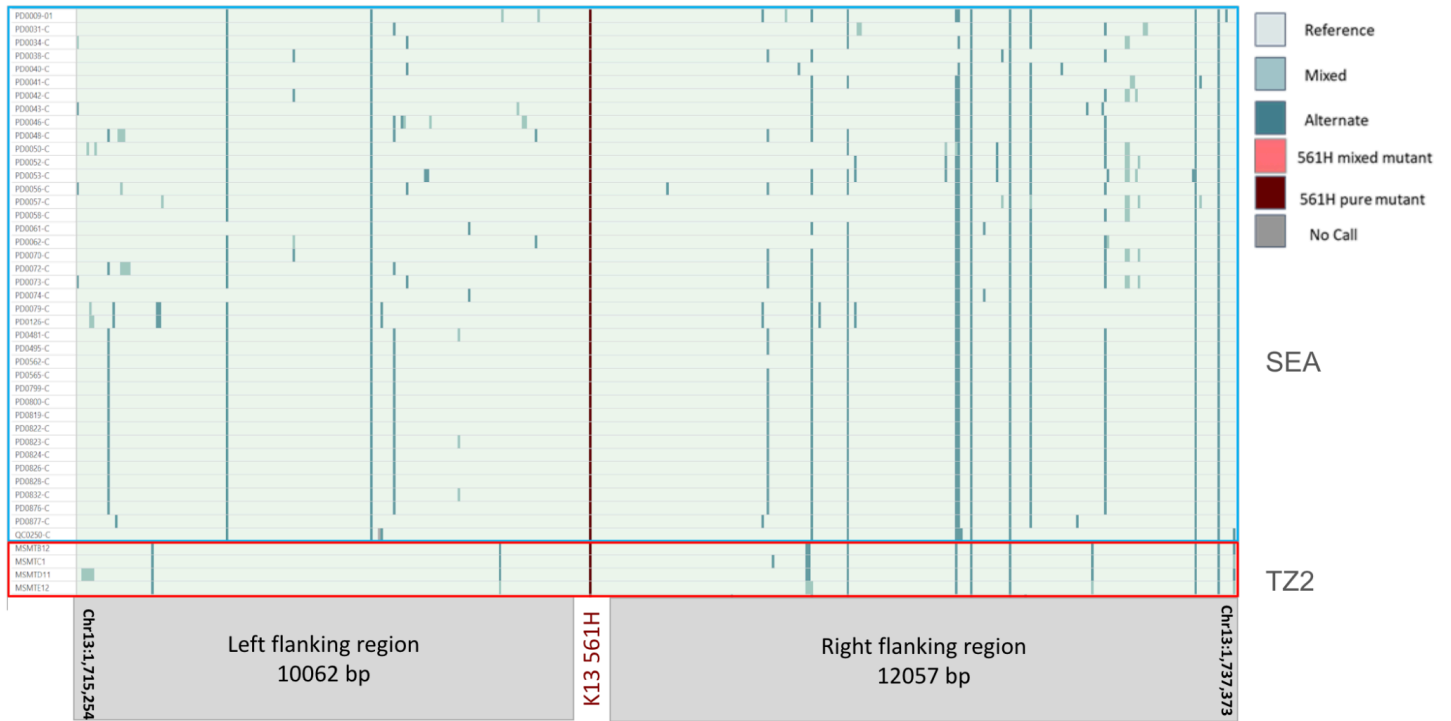

**Figure S3. Extended haplotype comparison between TZ2 and Southeast Asian (SEA) isolates.** R561H mutant parasites collected in SEA from Pf7K (blue box) are compared to TZ2 isolates (red box) from this study. Extended haplotypes show two distinct groups.

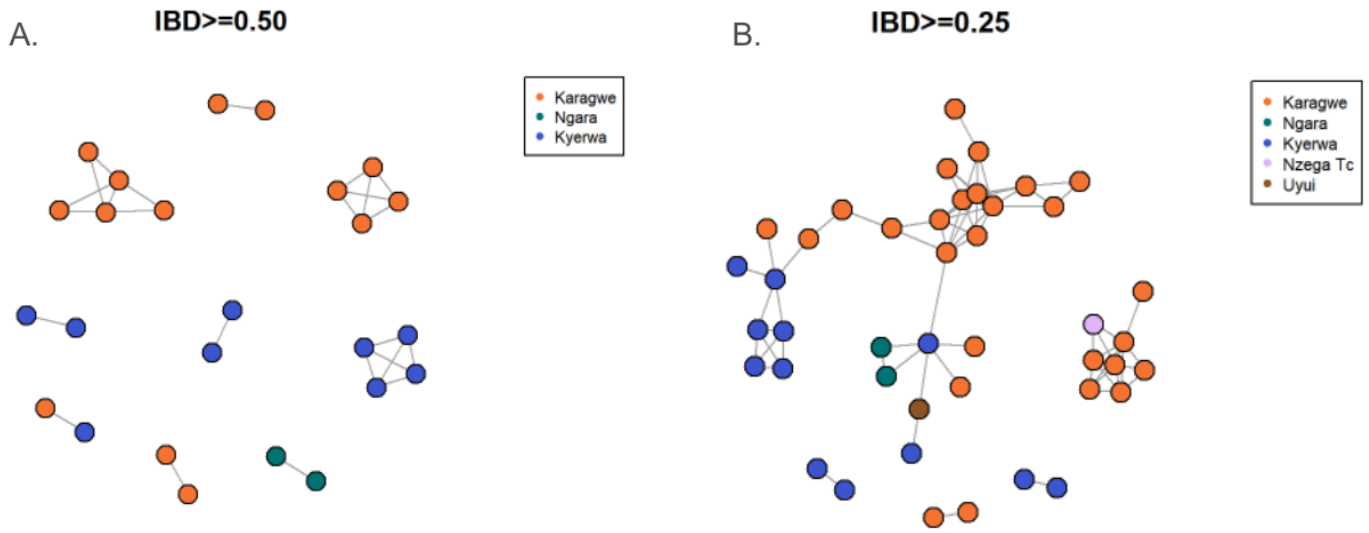

**Figure S4. Inheritance by descent relatedness among R561H parasite infection in Kagera.** IBD ranges from 0 (completely unrelated) to 1 (identical) for infections. Panel A and B show networks of parasites with 0.5 and 0.25 IBD, respectively. Isolates are colored by the district that they are from.

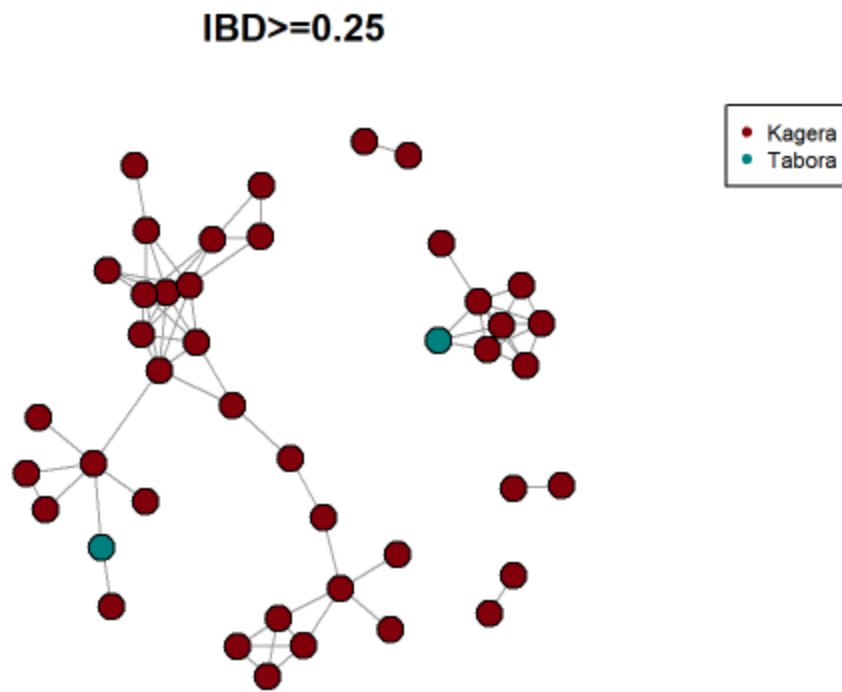

**Figure S5. IBD relatedness of R561H infections between regions.** At an IBD level of 0.25, the two parasite isolates from Tabora cluster with isolates from Kagera. The isolates in other regions remain not connected to the network demonstrating lower levels of relatedness.

## REFERENCES

1. Popkin Hall ZR, Seth MD, Madebe RA, Budodo R, Bakari C, Francis F, et al. Malaria species positivity rates among symptomatic individuals across regions of differing transmission intensities in Mainland Tanzania. *J Infect Dis* [Internet]. 2023 Nov 22; Available from: <http://dx.doi.org/10.1093/infdis/jiad522>
2. Rogier E, Battle N, Bakari C, Seth MD, Nace D, Herman C, et al. Plasmodium falciparum pfhpr2 and pfhpr3 gene deletions among patients enrolled at 100 health facilities throughout Tanzania: February to July 2021 [Internet]. medRxiv. 2023 [cited 2024 Mar 14]. p. 2023.07.29.23293322. Available from: <https://www.medrxiv.org/content/10.1101/2023.07.29.23293322v1.abstract>
3. Popkin-Hall ZR, Seth MD, Madebe RA, Budodo R, Bakari C, Francis F, et al. Prevalence of non-falciparum malaria infections among asymptomatic individuals in four regions of Mainland Tanzania. *Parasit Vectors*. 2024 Mar 23;17(1):153.
4. Ishengoma DS, Mmbando BP, Mandara CI, Chiduo MG, Francis F, Timiza W, et al. Trends of Plasmodium falciparum prevalence in two communities of Muheza district North-eastern Tanzania: correlation between parasite prevalence, malaria interventions and rainfall in the context of re-emergence of malaria after two decades of progressively declining transmission. *Malar J*. 2018 Jul 6;17(1):252.
5. Moser KA, Madebe RA, Aydemir O, Chiduo MG, Mandara CI, Rumisha SF, et al. Describing the current status of Plasmodium falciparum population structure and drug resistance within mainland Tanzania using molecular inversion probes. *Mol Ecol* [Internet]. 2020 Oct 26; Available from: <http://dx.doi.org/10.1111/mec.15706>
6. Fola AA, Feleke SM, Mohammed H, Brhane BG, Hennelly CM, Assefa A, et al. Plasmodium falciparum resistant to artemisinin and diagnostics have emerged in Ethiopia. *Nat Microbiol*. 2023 Oct;8(10):1911–9.
7. Verity R, Aydemir O, Brazeau NF, Watson OJ, Hathaway NJ, Mwandagalirwa MK, et al. The impact of antimalarial resistance on the genetic structure of Plasmodium falciparum in the DRC. *Nat Commun*. 2020 Apr 30;11(1):2107.
8. Oyola SO, Ariani CV, Hamilton WL, Kekre M, Amenga-Etego LN, Ghansah A, et al. Whole genome sequencing of Plasmodium falciparum from dried blood spots using selective whole genome amplification. *Malar J*. 2016 Dec 20;15(1):597.
9. Miotto O, Amato R, Ashley EA, MacInnis B, Almagro-Garcia J, Amaratunga C, et al. Genetic architecture of artemisinin-resistant Plasmodium falciparum. *Nat Genet*. 2015 Mar;47(3):226–34.
10. Ross LS, Fidock DA. Elucidating Mechanisms of Drug-Resistant Plasmodium falciparum. *Cell Host Microbe*. 2019 Jul 10;26(1):35–47.
11. Rosenthal PJ, Asua V, Conrad MD. Emergence, transmission dynamics and mechanisms of artemisinin partial resistance in malaria parasites in Africa. *Nat Rev Microbiol* [Internet]. 2024 Feb 6; Available from: <http://dx.doi.org/10.1038/s41579-024-01008-2>
12. Blasco B, Leroy D, Fidock DA. Antimalarial drug resistance: linking Plasmodium falciparum parasite biology to the clinic. *Nat Med*. 2017 Aug 4;23(8):917–28.
13. Website [Internet]. Available from: <https://iris.who.int/bitstream/handle/10665/336692/9789240012813-eng.pdf?sequence=1>
